# Supplementary material for: Density Functional Method Study on the Cooperativity of Intermolecular H-bonding and π-π+ Stacking Interactions in Thymine-[Cnmim]Br (n = 2, 4, 6, 8, 10) Microhydrates
Source: MDPI journal article supplement (doi:10.3390/molecules27196242), 2022-09-22
Supplement: s1 [file s1]

# Density Functional Method Study on the Cooperativity of Intermolecular H-bonding and $\pi$ - $\pi^+$ Stacking Interactions in Thymine- $[\text{C}_n\text{mim}]\text{Br}$ ( $n = 2, 4, 6, 8, 10$ ) Microhydrates

Yanni Wang<sup>1</sup>, Chaowu Dai<sup>1</sup>, Wei Huang<sup>1</sup>, Tingting Ni<sup>2</sup>, Jianping Cao<sup>2</sup>, Jiangmei Pang<sup>2</sup>, Huining Wei<sup>2</sup> and Chaojie Wang<sup>2\*</sup>

<sup>1</sup>The Third Affiliated Hospital of Wenzhou Medical University; the Pharmacy Department of Ruian People's Hospital, Wenzhou 325000, Zhejiang, China.

<sup>2</sup>School of Pharmaceutical Sciences, Wenzhou Medical University, Wenzhou 325035, Zhejiang, China.

\*Correspondence: chjwang@wmu.edu.cn

## Contents

|                 |                                                                                                                                                                                                                                                                                                                                                                                                                                                                                                                                                                              |    |
|-----------------|------------------------------------------------------------------------------------------------------------------------------------------------------------------------------------------------------------------------------------------------------------------------------------------------------------------------------------------------------------------------------------------------------------------------------------------------------------------------------------------------------------------------------------------------------------------------------|----|
| <b>Table S1</b> | Calculated geometrical parameters of the isolated thymine at the M06-2X/6-311++G(2d, p)/PCM/water level. Bond lengths in angstrom (Å) and angles in degree (°).                                                                                                                                                                                                                                                                                                                                                                                                              | 1  |
| <b>Table S2</b> | Calculated energetic characteristics of the ionic T-y $[\text{C}_n\text{mim}]^+-x\text{Br}^-$ ( $n = 2, 4, 6, 8, 10$ ) for three stacking, perpendicular, and coplanar configurations at the M06-2X/6-311++G(2d, p)/PCM/water level (in kJ/mol).                                                                                                                                                                                                                                                                                                                             | 3  |
| <b>Table S3</b> | Calculated geometrical parameters of the ionic T-y $[\text{C}_n\text{mim}]^+-x\text{Br}^-$ ( $n = 2, 4, 6, 8, 10$ ) for the most stable stacking configuration at the M06-2X/6-311++G(2d, p)/PCM/water level. Bond lengths in angstrom (Å).                                                                                                                                                                                                                                                                                                                                  | 4  |
| <b>Table S4</b> | Calculated energetic characteristics of the stepwise microhydrated T-wH <sub>2</sub> O-y $[\text{C}_n\text{mim}]^+-x\text{Br}^-$ ( $w = 1, 2, 3, 4, 5$ and $n = 2, 4, 6, 8, 10$ ) for each most stable configuration at the M06-2X/6-311++G(2d, p)/PCM/water level (in kJ/mol).                                                                                                                                                                                                                                                                                              | 5  |
| <b>Table S5</b> | Calculated geometrical parameters of the microhydrated T-wH <sub>2</sub> O-y $[\text{C}_n\text{mim}]^+-x\text{Br}^-$ ( $w = 1, 2, 3, 4, 5$ and $n = 2, 4, 6, 8, 10$ ) for the most stable configuration at the M06-2X/6-311++G(2d, p)/PCM/water level. Bond lengths in angstrom (Å).                                                                                                                                                                                                                                                                                         | 6  |
| <b>Table S6</b> | Calculated wavenumbers (Wave, cm <sup>-1</sup> ), intensities (Intens., km/mol) of vibrational modes and the corresponding main contributions (Contri., %) to the absorption maxima (Absorp., cm <sup>-1</sup> ) for the isolated thymine.                                                                                                                                                                                                                                                                                                                                   | 7  |
| <b>Table S7</b> | Calculated wavenumbers (Wave, cm <sup>-1</sup> ), intensities (Intens., km/mol) of vibrational modes and the corresponding main contributions (Contri., %) to the absorption maxima (Absorp., cm <sup>-1</sup> ) located within 3700-3300 cm <sup>-1</sup> and 1800-1700 cm <sup>-1</sup> for the thymine in the most stable T-4H <sub>2</sub> O-Br-1, T-3H <sub>2</sub> O- $[\text{C}_n\text{mim}]^+-\text{Br}^-$ -1, T-2H <sub>2</sub> O- $[\text{C}_n\text{mim}]^+-2\text{Br}^-$ -1, and T-1H <sub>2</sub> O-2 $[\text{C}_n\text{mim}]^+-2\text{Br}^-$ -1 micro-hydrates. | 9  |
| <b>Table S8</b> | NPA charge and charge transfer in the most stable T-4H <sub>2</sub> O-Br-1, T-3H <sub>2</sub> O- $[\text{C}_n\text{mim}]^+-\text{Br}^-$ -1, T-2H <sub>2</sub> O- $[\text{C}_n\text{mim}]^+-2\text{Br}^-$ -1, and T-1H <sub>2</sub> O-2 $[\text{C}_n\text{mim}]^+-2\text{Br}^-$ -1 micro-hydrates with respect to the corresponding isolated fragment, respectively (in a.u.).                                                                                                                                                                                                | 12 |

**Table S1.** Calculated geometrical parameters of the isolated thymine at the M06-2X/6-311++G(2*d*, *p*)/PCM/water level. Bond lengths in angstrom (Å) and angles in degree (°).

| Bond distance (Å) | Exp. <sup>a</sup> | Calc. <sup>a1</sup> | Calc. <sup>a2</sup> | Calc. <sup>c</sup> | Bond angles (°) | Exp. <sup>a</sup> | Calc. <sup>a1</sup> | Calc. <sup>a2</sup> | Calc. <sup>c</sup> |
|-------------------|-------------------|---------------------|---------------------|--------------------|-----------------|-------------------|---------------------|---------------------|--------------------|
| <b>N1-C2</b>      | 1.358             | 1.367               | 1.407               | 1.379              | <b>C2-N1-C6</b> | 122.5             | 123.5               | 124.2               | 123.6              |
| <b>C2-N3</b>      | 1.361             | 1.369               | 1.400               | 1.379              | <b>N1-C2-N3</b> | 115.5             | 113.2               | 111.9               | 113.0              |
| <b>N3-C4</b>      | 1.401             | 1.387               | 1.426               | 1.398              | <b>C2-N3-C4</b> | 126.3             | 127.8               | 128.5               | 127.7              |
| <b>C4-C5</b>      | 1.453             | 1.471               | 1.476               | 1.466              | <b>N3-C4-C5</b> | 115.1             | 114.8               | 114.3               | 114.9              |
| <b>C5=C6</b>      | 1.343             | 1.328               | 1.365               | 1.340              | <b>C4-C5=C6</b> | 118.4             | 117.7               | 118.4               | 118.0              |
| <b>C6-N1</b>      | 1.384             | 1.375               | 1.389               | 1.377              | <b>N1-C6=C5</b> | 122.3             | 123.0               | 122.6               | 122.8              |
| <b>C2=O7</b>      | 1.244             | 1.192               | 1.23                | 1.207              | <b>N1-C2=O7</b> | 122.4             | 123.3               | 123.2               | 123.2              |
| <b>C4=O8</b>      | 1.225             | 1.193               | 1.235               | 1.209              | <b>N3-C4=O8</b> | 119.2             | 120.6               | 120.3               | 120.5              |
| <b>C5-C9</b>      | 1.502             | 1.508               | 1.511               | 1.495              |                 |                   |                     |                     |                    |
| <b>N1-H</b>       |                   | 0.995               | 1.019               | 1.008              |                 |                   |                     |                     |                    |
| <b>N3-H</b>       |                   | 0.998               | 1.022               | 1.012              |                 |                   |                     |                     |                    |
| <b>C6-H</b>       |                   | 1.073               | 1.093               | 1.083              |                 |                   |                     |                     |                    |

Exp.<sup>a</sup> observed values cited from X-ray data of thymine from ref. [75]

Cal.<sup>a1</sup> and Cal.<sup>a2</sup> predicted values of thymine based on HF/4-31G\*\* and B3LYP/6-31G\*\* levels are both from ref. [75]

Cal.<sup>c</sup> this work

**Table S2.** Calculated energetic characteristics of the ionic  $T\gamma[C_n\text{mim}]^+-x\text{Br}^-$  ( $n = 2, 4, 6, 8, 10$ ) for three stacking, perpendicular, and coplanar configurations at the M06-2X/6-311++G(2*d*, *p*)/PCM/water level (in kJ/mol).

| Complexes                                    | Config. | $E_B$   | $E_D^T$ | $E_{BSSE}$ | Complexes                                    | Config. | $E_B$  | $E_D^T$ | $E_{BSSE}$ | Complexes                                    | Config. | $E_B$  | $E_D^T$ | $E_{BSSE}$ |
|----------------------------------------------|---------|---------|---------|------------|----------------------------------------------|---------|--------|---------|------------|----------------------------------------------|---------|--------|---------|------------|
| <b>T-Br-1</b>                                | front   | -22.16  | 1.11    | 1.13       |                                              |         |        |         |            |                                              |         |        |         |            |
| T-[C <sub>2</sub> mim] <sup>+</sup> -1       | S1      | -16.49  | 0.35    | 3.70       | T-[C <sub>2</sub> mim] <sup>+</sup> -5       | P1      | -13.12 | 0.08    | 1.54       | T-[C <sub>2</sub> mim] <sup>+</sup> -9       | H1      | -12.00 | 0.04    | 1.28       |
| T-[C <sub>4</sub> mim] <sup>+</sup> -1       | S1      | -15.35  | 0.31    | 3.79       | T-[C <sub>4</sub> mim] <sup>+</sup> -5       | P1      | -11.24 | 0.07    | 1.60       | T-[C <sub>4</sub> mim] <sup>+</sup> -9       | H1      | -11.49 | 0.04    | 1.29       |
| T-[C <sub>6</sub> mim] <sup>+</sup> -1       | S1      | -16.86  | 0.28    | 3.87       | T-[C <sub>6</sub> mim] <sup>+</sup> -5       | P1      | -13.33 | 0.10    | 1.65       | T-[C <sub>6</sub> mim] <sup>+</sup> -9       | H1      | -12.62 | 0.05    | 1.30       |
| T-[C <sub>8</sub> mim] <sup>+</sup> -1       | S1      | -16.66  | 0.29    | 3.91       | T-[C <sub>8</sub> mim] <sup>+</sup> -5       | P1      | -13.06 | 0.08    | 1.66       | T-[C <sub>8</sub> mim] <sup>+</sup> -9       | H1      | -12.00 | 0.04    | 1.31       |
| T-[C <sub>10</sub> mim] <sup>+</sup> -1      | S1      | -16.28  | 0.29    | 3.90       | T-[C <sub>10</sub> mim] <sup>+</sup> -5      | P1      | -11.64 | 0.08    | 1.65       | T-[C <sub>10</sub> mim] <sup>+</sup> -9      | H1      | -10.62 | 0.05    | 1.28       |
| T-[C <sub>2</sub> mim] <sup>+</sup> -Br-1    | S1      | -54.41  | 1.32    | 5.22       | T-[C <sub>2</sub> mim] <sup>+</sup> -Br-5    | P1      | -50.46 | 2.42    | 1.28       | T-[C <sub>2</sub> mim] <sup>+</sup> -Br-9    | H1      | -46.33 | 2.31    | 0.88       |
| T-[C <sub>4</sub> mim] <sup>+</sup> -Br-1    | S1      | -53.16  | 1.32    | 5.26       | T-[C <sub>4</sub> mim] <sup>+</sup> -Br-5    | P1      | -49.37 | 2.39    | 1.29       | T-[C <sub>4</sub> mim] <sup>+</sup> -Br-9    | H1      | -47.55 | 2.25    | 0.91       |
| T-[C <sub>6</sub> mim] <sup>+</sup> -Br-1    | S1      | -54.69  | 1.28    | 5.28       | T-[C <sub>6</sub> mim] <sup>+</sup> -Br-5    | P1      | -50.54 | 2.41    | 1.33       | T-[C <sub>6</sub> mim] <sup>+</sup> -Br-9    | H1      | -48.54 | 2.24    | 0.92       |
| T-[C <sub>8</sub> mim] <sup>+</sup> -Br-1    | S1      | -54.61  | 1.30    | 5.32       | T-[C <sub>8</sub> mim] <sup>+</sup> -Br-5    | P1      | -49.90 | 2.44    | 1.33       | T-[C <sub>8</sub> mim] <sup>+</sup> -Br-9    | H1      | -48.96 | 2.24    | 0.91       |
| T-[C <sub>10</sub> mim] <sup>+</sup> -Br-1   | S1      | -53.40  | 1.33    | 5.33       | T-[C <sub>10</sub> mim] <sup>+</sup> -Br-5   | P1      | -48.95 | 2.45    | 1.32       | T-[C <sub>10</sub> mim] <sup>+</sup> -Br-9   | H1      | -47.75 | 2.20    | 0.91       |
| T-[C <sub>2</sub> mim] <sup>+</sup> -2Br-1   | S       | -79.08  | 2.09    | 6.99       | T-[C <sub>2</sub> mim] <sup>+</sup> -2Br-5   | P       | -66.65 | 2.22    | 5.07       | T-[C <sub>2</sub> mim] <sup>+</sup> -2Br-9   | H       | -63.77 | 1.94    | 4.51       |
| T-[C <sub>4</sub> mim] <sup>+</sup> -2Br-1   | S       | -74.42  | 3.17    | 6.51       | T-[C <sub>4</sub> mim] <sup>+</sup> -2Br-5   | P       | -65.63 | 1.97    | 3.53       | T-[C <sub>4</sub> mim] <sup>+</sup> -2Br-9   | H       | -64.50 | 1.56    | 3.29       |
| T-[C <sub>6</sub> mim] <sup>+</sup> -2Br-1   | S       | -75.04  | 3.14    | 6.53       | T-[C <sub>6</sub> mim] <sup>+</sup> -2Br-5   | P       | -67.26 | 1.96    | 3.55       | T-[C <sub>6</sub> mim] <sup>+</sup> -2Br-9   | H       | -66.24 | 1.54    | 3.28       |
| T-[C <sub>8</sub> mim] <sup>+</sup> -2Br-1   | S       | -79.67  | 2.93    | 7.06       | T-[C <sub>8</sub> mim] <sup>+</sup> -2Br-5   | P       | -64.58 | 1.97    | 3.59       | T-[C <sub>8</sub> mim] <sup>+</sup> -2Br-9   | H       | -65.53 | 1.57    | 3.28       |
| T-[C <sub>10</sub> mim] <sup>+</sup> -2Br-1  | S       | -74.29  | 3.09    | 6.65       | T-[C <sub>10</sub> mim] <sup>+</sup> -2Br-5  | P       | -64.85 | 1.96    | 3.56       | T-[C <sub>10</sub> mim] <sup>+</sup> -2Br-9  | H       | -65.07 | 1.60    | 3.24       |
| T-2[C <sub>2</sub> mim] <sup>+</sup> -2Br-1  | S       | -109.47 | 2.09    | 11.17      | T-2[C <sub>2</sub> mim] <sup>+</sup> -2Br-5  | P       | -96.88 | 2.22    | 5.07       | T-2[C <sub>2</sub> mim] <sup>+</sup> -2Br-9  | H       | -90.75 | 1.94    | 4.51       |
| T-2[C <sub>4</sub> mim] <sup>+</sup> -2Br-1  | S       | -107.80 | 2.09    | 11.15      | T-2[C <sub>4</sub> mim] <sup>+</sup> -2Br-5  | P       | -94.79 | 2.41    | 4.98       | T-2[C <sub>4</sub> mim] <sup>+</sup> -2Br-9  | H       | -92.70 | 2.00    | 4.29       |
| T-2[C <sub>6</sub> mim] <sup>+</sup> -2Br-1  | S       | -109.91 | 2.11    | 11.13      | T-2[C <sub>6</sub> mim] <sup>+</sup> -2Br-5  | P       | -96.87 | 2.40    | 5.04       | T-2[C <sub>6</sub> mim] <sup>+</sup> -2Br-9  | H       | -95.68 | 1.94    | 4.31       |
| T-2[C <sub>8</sub> mim] <sup>+</sup> -2Br-1  | S       | -109.71 | 2.10    | 11.25      | T-2[C <sub>8</sub> mim] <sup>+</sup> -2Br-5  | P       | -95.67 | 2.33    | 5.08       | T-2[C <sub>8</sub> mim] <sup>+</sup> -2Br-9  | H       | -95.01 | 1.99    | 4.34       |
| T-2[C <sub>10</sub> mim] <sup>+</sup> -2Br-1 | S       | -107.61 | 2.10    | 11.27      | T-2[C <sub>10</sub> mim] <sup>+</sup> -2Br-5 | P       | -93.96 | 2.40    | 5.00       | T-2[C <sub>10</sub> mim] <sup>+</sup> -2Br-9 | H       | -92.95 | 1.94    | 4.36       |

**Table S3.** Calculated geometrical parameters of the ionic T- $\gamma$ [C<sub>n</sub>mim]<sup>+</sup>-xBr<sup>-</sup> (n = 2, 4, 6, 8, 10) for the most stable stacking configuration at the M06-2X/6-311++G(2d, p)/PCM/water level. Bond lengths in angstrom (Å).

| Geometries                                      | T     |       |       |       |       | [C <sub>n</sub> mim] <sup>+</sup> |                     |                     | T-[C <sub>n</sub> mim] <sup>+</sup> |
|-------------------------------------------------|-------|-------|-------|-------|-------|-----------------------------------|---------------------|---------------------|-------------------------------------|
|                                                 | N1-H  | C2=O7 | N3-H  | C4=O8 | C6-H  | <sup>+</sup> C(2)-H               | <sup>+</sup> C(6)-H | <sup>+</sup> C(7)-H | $\pi \cdots \pi^+$                  |
| <b>Monomer</b>                                  | 1.010 | 1.216 | 1.013 | 1.219 | 1.082 | 1.078                             | 1.086               | 1.088               | -                                   |
| <b>T-Br-1</b>                                   | 1.025 | 1.219 | 1.013 | 1.221 | 1.083 | -                                 | -                   | -                   | -                                   |
| <b>T-[C<sub>2</sub>mim]<sup>+</sup>-1</b>       | 1.011 | 1.217 | 1.013 | 1.217 | 1.083 | 1.078                             | 1.086               | 1.088               | 3.411                               |
| <b>T-[C<sub>4</sub>mim]<sup>+</sup>-1</b>       | 1.011 | 1.217 | 1.013 | 1.217 | 1.083 | 1.078                             | 1.086               | 1.090               | 3.420                               |
| <b>T-[C<sub>6</sub>mim]<sup>+</sup>-1</b>       | 1.011 | 1.217 | 1.013 | 1.217 | 1.083 | 1.078                             | 1.086               | 1.090               | 3.399                               |
| <b>T-[C<sub>8</sub>mim]<sup>+</sup>-1</b>       | 1.011 | 1.217 | 1.013 | 1.217 | 1.083 | 1.078                             | 1.086               | 1.090               | 3.383                               |
| <b>T-[C<sub>10</sub>mim]<sup>+</sup>-1</b>      | 1.011 | 1.217 | 1.013 | 1.217 | 1.082 | 1.078                             | 1.086               | 1.090               | 3.413                               |
| <b>T-[C<sub>2</sub>mim]<sup>+</sup>-Br-1</b>    | 1.022 | 1.219 | 1.013 | 1.219 | 1.084 | 1.078                             | 1.076               | 1.090               | 3.446                               |
| <b>T-[C<sub>4</sub>mim]<sup>+</sup>-Br-1</b>    | 1.022 | 1.219 | 1.013 | 1.219 | 1.084 | 1.078                             | 1.076               | 1.092               | 3.424                               |
| <b>T-[C<sub>6</sub>mim]<sup>+</sup>-Br-1</b>    | 1.022 | 1.219 | 1.013 | 1.219 | 1.084 | 1.078                             | 1.076               | 1.092               | 3.449                               |
| <b>T-[C<sub>8</sub>mim]<sup>+</sup>-Br-1</b>    | 1.022 | 1.219 | 1.013 | 1.219 | 1.084 | 1.078                             | 1.076               | 1.092               | 3.395                               |
| <b>T-[C<sub>10</sub>mim]<sup>+</sup>-Br-1</b>   | 1.022 | 1.219 | 1.013 | 1.219 | 1.084 | 1.078                             | 1.076               | 1.091               | 3.412                               |
| <b>T-[C<sub>2</sub>mim]<sup>+</sup>-2Br-1</b>   | 1.021 | 1.220 | 1.027 | 1.221 | 1.083 | 1.083                             | 1.086               | 1.091               | 3.306                               |
| <b>T-[C<sub>4</sub>mim]<sup>+</sup>-2Br-1</b>   | 1.023 | 1.220 | 1.024 | 1.222 | 1.084 | 1.078                             | 1.086               | 1.091               | 3.347                               |
| <b>T-[C<sub>6</sub>mim]<sup>+</sup>-2Br-1</b>   | 1.023 | 1.221 | 1.024 | 1.222 | 1.084 | 1.078                             | 1.086               | 1.091               | 3.369                               |
| <b>T-[C<sub>8</sub>mim]<sup>+</sup>-2Br-1</b>   | 1.021 | 1.220 | 1.027 | 1.221 | 1.083 | 1.082                             | 1.086               | 1.091               | 3.331                               |
| <b>T-[C<sub>10</sub>mim]<sup>+</sup>-2Br-1</b>  | 1.023 | 1.221 | 1.024 | 1.222 | 1.084 | 1.078                             | 1.086               | 1.091               | 3.336                               |
| <b>T-2[C<sub>2</sub>mim]<sup>+</sup>-2Br-1</b>  | 1.022 | 1.222 | 1.028 | 1.222 | 1.084 | 1.078                             | 1.087               | 1.090               | 3.358                               |
| <b>T-2[C<sub>4</sub>mim]<sup>+</sup>-2Br-1</b>  | 1.023 | 1.222 | 1.028 | 1.222 | 1.084 | 1.078                             | 1.086               | 1.091               | 3.397                               |
| <b>T-2[C<sub>6</sub>mim]<sup>+</sup>-2Br-1</b>  | 1.022 | 1.222 | 1.028 | 1.222 | 1.084 | 1.078                             | 1.086               | 1.091               | 3.410                               |
| <b>T-2[C<sub>8</sub>mim]<sup>+</sup>-2Br-1</b>  | 1.022 | 1.222 | 1.028 | 1.222 | 1.084 | 1.078                             | 1.086               | 1.091               | 3.419                               |
| <b>T-2[C<sub>10</sub>mim]<sup>+</sup>-2Br-1</b> | 1.022 | 1.222 | 1.028 | 1.222 | 1.084 | 1.078                             | 1.086               | 1.091               | 3.388                               |

**Table S4.** Calculated energetic characteristics of the stepwise micro-hydrated  $T-wH_2O-y[C_nmim]^+-xBr^-$  ( $w = 1, 2, 3, 4, 5$  and  $n = 2, 4, 6, 8, 10$ ) for each most stable configuration at the M06-2X/6-311++G(2d, p)/PCM/water level (in kJ/mol).

| Complexes                 |                                                                            |         |      |       | Complexes                     |                                                                              |         |      |       |
|---------------------------|----------------------------------------------------------------------------|---------|------|-------|-------------------------------|------------------------------------------------------------------------------|---------|------|-------|
|                           |                                                                            |         |      |       |                               |                                                                              |         |      |       |
| $E_B$                     |                                                                            |         |      |       | $E_B$                         |                                                                              |         |      |       |
| $E_D^T$                   |                                                                            |         |      |       | $E_D^T$                       |                                                                              |         |      |       |
| $E_{BSSE}$                |                                                                            |         |      |       | $E_{BSSE}$                    |                                                                              |         |      |       |
| $T-wH_2O-1$               | T-1H <sub>2</sub> O-1                                                      | -15.45  | 0.50 | 2.83  | $T-wH_2O-Br^-1$               | T-1H <sub>2</sub> O-Br <sup>-</sup> -1                                       | -43.39  | 1.34 | 2.43  |
|                           | T-2H <sub>2</sub> O-1                                                      | -28.27  | 1.67 | 4.14  |                               | T-2H <sub>2</sub> O-Br <sup>-</sup> -1                                       | -58.93  | 2.06 | 5.38  |
|                           | T-3H <sub>2</sub> O-1                                                      | -43.79  | 2.37 | 6.88  |                               | T-3H <sub>2</sub> O-Br <sup>-</sup> -1                                       | -81.29  | 2.80 | 6.09  |
|                           | T-4H <sub>2</sub> O-1                                                      | -55.32  | 3.41 | 8.52  |                               | T-4H <sub>2</sub> O-Br <sup>-</sup> -1                                       | -102.74 | 4.89 | 7.74  |
|                           | T-5H <sub>2</sub> O-1                                                      | -97.39  | 5.44 | 9.12  |                               | -                                                                            | -       | -    | -     |
| $T-wH_2O-[C_nmim]^+Br^-1$ | T-1H <sub>2</sub> O-[C <sub>2</sub> mim] <sup>+</sup> -Br <sup>-</sup> -1  | -79.13  | 1.69 | 6.41  | $T-w-H_2O-[C_nmim]^+-2Br^-1$  | T-1H <sub>2</sub> O-[C <sub>2</sub> mim] <sup>+</sup> -2Br <sup>-</sup> -1   | -106.12 | 3.12 | 8.37  |
|                           | T-1H <sub>2</sub> O-[C <sub>4</sub> mim] <sup>+</sup> -Br <sup>-</sup> -1  | -78.69  | 1.73 | 6.52  |                               | T-1H <sub>2</sub> O-[C <sub>4</sub> mim] <sup>+</sup> -2Br <sup>-</sup> -1   | -106.04 | 3.13 | 8.28  |
|                           | T-1H <sub>2</sub> O-[C <sub>6</sub> mim] <sup>+</sup> -Br <sup>-</sup> -1  | -80.12  | 1.68 | 6.60  |                               | T-1H <sub>2</sub> O-[C <sub>6</sub> mim] <sup>+</sup> -2Br <sup>-</sup> -1   | -107.90 | 3.10 | 8.41  |
|                           | T-1H <sub>2</sub> O-[C <sub>8</sub> mim] <sup>+</sup> -Br <sup>-</sup> -1  | -79.65  | 1.73 | 6.65  |                               | T-1H <sub>2</sub> O-[C <sub>8</sub> mim] <sup>+</sup> -2Br <sup>-</sup> -1   | -106.90 | 3.12 | 8.46  |
|                           | T-1H <sub>2</sub> O-[C <sub>10</sub> mim] <sup>+</sup> -Br <sup>-</sup> -1 | -79.00  | 1.74 | 6.66  |                               | T-1H <sub>2</sub> O-[C <sub>10</sub> mim] <sup>+</sup> -2Br <sup>-</sup> -1  | -106.17 | 3.15 | 8.48  |
|                           | T-2H <sub>2</sub> O-[C <sub>2</sub> mim] <sup>+</sup> -Br <sup>-</sup> -1  | -96.55  | 3.20 | 9.34  | $T-w-H_2O-2[C_nmim]^+-2Br^-1$ | T-2H <sub>2</sub> O-[C <sub>2</sub> mim] <sup>+</sup> -2Br <sup>-</sup> -1   | -131.01 | 3.35 | 9.59  |
|                           | T-2H <sub>2</sub> O-[C <sub>4</sub> mim] <sup>+</sup> -Br <sup>-</sup> -1  | -94.36  | 2.42 | 9.07  |                               | T-2H <sub>2</sub> O-[C <sub>4</sub> mim] <sup>+</sup> -2Br <sup>-</sup> -1   | -130.93 | 3.28 | 9.69  |
|                           | T-2H <sub>2</sub> O-[C <sub>6</sub> mim] <sup>+</sup> -Br <sup>-</sup> -1  | -97.94  | 3.15 | 9.38  |                               | T-2H <sub>2</sub> O-[C <sub>6</sub> mim] <sup>+</sup> -2Br <sup>-</sup> -1   | -132.30 | 3.31 | 9.69  |
|                           | T-2H <sub>2</sub> O-[C <sub>8</sub> mim] <sup>+</sup> -Br <sup>-</sup> -1  | -97.86  | 3.15 | 9.40  |                               | T-2H <sub>2</sub> O-[C <sub>8</sub> mim] <sup>+</sup> -2Br <sup>-</sup> -1   | -132.97 | 3.28 | 9.62  |
|                           | T-2H <sub>2</sub> O-[C <sub>10</sub> mim] <sup>+</sup> -Br <sup>-</sup> -1 | -93.82  | 2.41 | 9.08  |                               | T-2H <sub>2</sub> O-[C <sub>10</sub> mim] <sup>+</sup> -2Br <sup>-</sup> -1  | -131.32 | 3.30 | 9.75  |
|                           | T-3H <sub>2</sub> O-[C <sub>2</sub> mim] <sup>+</sup> -Br <sup>-</sup> -1  | -126.09 | 4.00 | 10.37 | $T-w-H_2O-2[C_nmim]^+-2Br^-1$ | T-1H <sub>2</sub> O-2[C <sub>2</sub> mim] <sup>+</sup> -2Br <sup>-</sup> -1  | -137.46 | 2.89 | 12.33 |
|                           | T-3H <sub>2</sub> O-[C <sub>4</sub> mim] <sup>+</sup> -Br <sup>-</sup> -1  | -125.90 | 4.00 | 10.40 |                               | T-1H <sub>2</sub> O-2[C <sub>4</sub> mim] <sup>+</sup> -2Br <sup>-</sup> -1  | -134.71 | 2.81 | 12.41 |
|                           | T-3H <sub>2</sub> O-[C <sub>6</sub> mim] <sup>+</sup> -Br <sup>-</sup> -1  | -127.37 | 3.97 | 10.48 |                               | T-1H <sub>2</sub> O-2[C <sub>6</sub> mim] <sup>+</sup> -2Br <sup>-</sup> -1  | -137.63 | 2.83 | 12.40 |
|                           | T-3H <sub>2</sub> O-[C <sub>8</sub> mim] <sup>+</sup> -Br <sup>-</sup> -1  | -126.52 | 4.00 | 10.36 |                               | T-1H <sub>2</sub> O-2[C <sub>8</sub> mim] <sup>+</sup> -2Br <sup>-</sup> -1  | -136.71 | 2.86 | 12.46 |
|                           | T-3H <sub>2</sub> O-[C <sub>10</sub> mim] <sup>+</sup> -Br <sup>-</sup> -1 | -126.32 | 3.98 | 10.45 |                               | T-1H <sub>2</sub> O-2[C <sub>10</sub> mim] <sup>+</sup> -2Br <sup>-</sup> -1 | -136.29 | 2.85 | 12.48 |

**Table S5.** Calculated geometrical parameters of the micro-hydrated T- $w\text{H}_2\text{O}$ - $y[\text{C}_n\text{mim}]^+-x\text{Br}^-$  ( $w = 1, 2, 3, 4, 5$  and  $n = 2, 4, 6, 8, 10$ ) for the most stable configuration at the M06-2X/6-311++G(2*d*, *p*)/PCM/water level. Bond lengths in angstrom (Å)

| Geometrics                                                                   | T     |       |       |       |       | $[\text{C}_n\text{mim}]^+$ |                          |                          | $\text{T}-[\text{C}_n\text{mim}]^+$ |
|------------------------------------------------------------------------------|-------|-------|-------|-------|-------|----------------------------|--------------------------|--------------------------|-------------------------------------|
|                                                                              | N1-H  | C2=O7 | N3-H  | C4=O8 | C6-H  | $^+\text{C}(2)\text{-H}$   | $^+\text{C}(6)\text{-H}$ | $^+\text{C}(7)\text{-H}$ | $\pi\cdots\pi^+$                    |
| Monomer                                                                      | 1.010 | 1.216 | 1.013 | 1.219 | 1.082 | 1.08                       | 1.09                     | 1.09                     | -                                   |
| T-5H <sub>2</sub> O-1                                                        | 1.030 | 1.237 | 1.037 | 1.228 | 1.082 | -                          | -                        | -                        | -                                   |
| T-4H <sub>2</sub> O-Br <sup>-</sup> -1                                       | 1.026 | 1.234 | 1.036 | 1.229 | 1.083 | -                          | -                        | -                        | -                                   |
| T-3H <sub>2</sub> O-[C <sub>2</sub> mim] <sup>+</sup> -Br <sup>-</sup> -1    | 1.021 | 1.225 | 1.030 | 1.228 | 1.083 | 1.081                      | 1.086                    | 1.091                    | 3.320                               |
| T-3H <sub>2</sub> O-[C <sub>4</sub> mim] <sup>+</sup> -Br <sup>-</sup> -1    | 1.021 | 1.225 | 1.030 | 1.228 | 1.083 | 1.081                      | 1.086                    | 1.091                    | 3.312                               |
| T-3H <sub>2</sub> O-[C <sub>6</sub> mim] <sup>+</sup> -Br <sup>-</sup> -1    | 1.021 | 1.225 | 1.030 | 1.228 | 1.083 | 1.081                      | 1.087                    | 1.091                    | 3.327                               |
| T-3H <sub>2</sub> O-[C <sub>8</sub> mim] <sup>+</sup> -Br <sup>-</sup> -1    | 1.021 | 1.225 | 1.030 | 1.228 | 1.083 | 1.081                      | 1.086                    | 1.091                    | 3.322                               |
| T-3H <sub>2</sub> O-[C <sub>10</sub> mim] <sup>+</sup> -Br <sup>-</sup> -1   | 1.021 | 1.225 | 1.030 | 1.228 | 1.083 | 1.081                      | 1.086                    | 1.091                    | 3.306                               |
| T-2H <sub>2</sub> O-[C <sub>2</sub> mim] <sup>+</sup> -2Br <sup>-</sup> -1   | 1.020 | 1.225 | 1.029 | 1.225 | 1.083 | 1.081                      | 1.086                    | 1.091                    | 3.306                               |
| T-2H <sub>2</sub> O-[C <sub>4</sub> mim] <sup>+</sup> -2Br <sup>-</sup> -1   | 1.020 | 1.225 | 1.029 | 1.225 | 1.083 | 1.081                      | 1.087                    | 1.092                    | 3.318                               |
| T-2H <sub>2</sub> O-[C <sub>6</sub> mim] <sup>+</sup> -2Br <sup>-</sup> -1   | 1.020 | 1.225 | 1.029 | 1.225 | 1.083 | 1.081                      | 1.086                    | 1.091                    | 3.297                               |
| T-2H <sub>2</sub> O-[C <sub>8</sub> mim] <sup>+</sup> -2Br <sup>-</sup> -1   | 1.020 | 1.225 | 1.029 | 1.225 | 1.083 | 1.081                      | 1.086                    | 1.092                    | 3.322                               |
| T-2H <sub>2</sub> O-[C <sub>10</sub> mim] <sup>+</sup> -2Br <sup>-</sup> -1  | 1.020 | 1.225 | 1.029 | 1.225 | 1.083 | 1.081                      | 1.086                    | 1.091                    | 3.304                               |
| T-1H <sub>2</sub> O-2[C <sub>2</sub> mim] <sup>+</sup> -2Br <sup>-</sup> -1  | 1.023 | 1.220 | 1.029 | 1.228 | 1.084 | 1.079                      | 1.086                    | 1.088                    | 3.405                               |
| T-1H <sub>2</sub> O-2[C <sub>4</sub> mim] <sup>+</sup> -2Br <sup>-</sup> -1  | 1.023 | 1.220 | 1.029 | 1.228 | 1.084 | 1.078                      | 1.086                    | 1.089                    | 3.393                               |
| T-1H <sub>2</sub> O-2[C <sub>6</sub> mim] <sup>+</sup> -2Br <sup>-</sup> -1  | 1.023 | 1.220 | 1.029 | 1.228 | 1.084 | 1.078                      | 1.085                    | 1.089                    | 3.386                               |
| T-1H <sub>2</sub> O-2[C <sub>8</sub> mim] <sup>+</sup> -2Br <sup>-</sup> -1  | 1.023 | 1.220 | 1.029 | 1.228 | 1.084 | 1.079                      | 1.085                    | 1.089                    | 3.385                               |
| T-1H <sub>2</sub> O-2[C <sub>10</sub> mim] <sup>+</sup> -2Br <sup>-</sup> -1 | 1.023 | 1.220 | 1.029 | 1.228 | 1.084 | 1.079                      | 1.086                    | 1.089                    | 3.402                               |

**Table S6.** Calculated wavenumbers (Wave, cm<sup>-1</sup>), intensities (Intens., km/mol) of vibrational modes and the corresponding main contributions (Contri., %) to the absorption maxima (Absorp., cm<sup>-1</sup>) for the isolated thymine

| Max. | Mode.     | Contri. | Wave | Intens. | Assign.                       |
|------|-----------|---------|------|---------|-------------------------------|
| 3636 | <b>v1</b> | 96      | 3636 | 233     | <b>vN1-H</b>                  |
| 3599 | <b>v2</b> | 89      | 3599 | 135     | <b>vN3-H</b>                  |
| 3244 | v3        | 79      | 3244 | 3       | vC6-H                         |
| 3150 | v4        | 90      | 3150 | 12      | v <sup>as</sup> CH3           |
| 3114 | v5        | 84      | 3114 | 10      | v <sup>as</sup> CH3           |
| 3054 | v6        | 97      | 3054 | 23      | v <sup>s</sup> CH3            |
| 1774 | <b>v7</b> | 90      | 1774 | 871     | <b>vC2=O7 + ρN1-H</b>         |
| 1734 | <b>v8</b> | 44      | 1735 | 617     | <b>vC4=O8 + ρN3-H</b>         |
| 1723 | <b>v9</b> | 84      | 1723 | 1629    | <b>vC5=C6 + ρN3-H + ρC6-H</b> |
| 1523 | v10       | 96      | 1523 | 235     | βN1-H                         |
| 1486 | v11       | 30      | 1487 | 1       | δ <sup>as</sup> CH3           |
| 1470 | v12       | 21      | 1471 | 13      | δ <sup>as</sup> CH3           |
| 1451 | v13       | 92      | 1451 | 153     | ρN1-H                         |
|      | v14       |         | 1422 | 5       | ρN3-H + δ <sup>s</sup> CH3    |
| 1420 | v15       | 21      | 1420 | 7       | δ <sup>s</sup> CH3 + ρN3-H    |
| 1388 | v16       | 47      | 1388 | 9       | β C6-H                        |
| 1251 | v17       | 13      | 1251 | 4       | vC5-CH3                       |
| 1215 | v18       | 99      | 1215 | 342     | v ring                        |
| 1172 | v19       | 51      | 1173 | 20      | v ring                        |
| 1076 | v20       | 38      | 1077 | 3       | ρCH3                          |
| 1034 | v21       | 69      | 1034 | 9       | ρCH3                          |
| 991  | v22       | 84      | 991  | 21      | ρCH3                          |
| 956  | v23       | 84      | 957  | 20      | γC6-H + γCH3                  |
| 818  | v24       | 64      | 818  | 17      | α ring                        |
| 790  | v25       | 78      | 790  | 49      | γC4=O8                        |

**Table S6.** *(continued)*

|     |            |    |     |     |                         |
|-----|------------|----|-----|-----|-------------------------|
| 771 | $\nu_{26}$ | 71 | 771 | 39  | $\gamma_{\text{C2=O7}}$ |
| 752 | $\nu_{27}$ | 36 | 752 | 9   | $\nu_{\text{C4-C5}}$    |
| 671 | $\nu_{28}$ | 98 | 671 | 138 | $\gamma_{\text{N3-H}}$  |
| 616 | $\nu_{29}$ | 18 | 616 | 2   | $\gamma_{\text{N3-H}}$  |
| 559 | $\nu_{30}$ | 86 | 559 | 93  | $\alpha$ ring           |
|     | $\nu_{31}$ |    | 558 | 13  | $\gamma_{\text{N1-H}}$  |

---

$\nu_{as}$ : asymmetric stretching;  $\nu_s$ : symmetric stretching;  $\alpha$ : angle bending;  $\beta$ : in-plane bending;  $\gamma$ : out-of-plane bending;  $\delta$ : deformation;  $\rho$ : rocking



**Table S7.** Calculated wavenumbers (Wave,  $\text{cm}^{-1}$ ), intensities (Intens.,  $\text{km/mol}$ ) of vibrational modes and the corresponding main contributions (Contri., %) to the absorption maxima (Absorp.,  $\text{cm}^{-1}$ ) located within  $3700\text{-}3300\text{ cm}^{-1}$  and  $1800\text{-}1700\text{ cm}^{-1}$  for the thymine in the most stable T-4H<sub>2</sub>O-Br<sup>-</sup>-1, T-3H<sub>2</sub>O-[C<sub>n</sub>mim]<sup>+</sup>-Br<sup>-</sup>-1, T-2H<sub>2</sub>O-[C<sub>n</sub>mim]<sup>+</sup>-2Br<sup>-</sup>-1, and T-1H<sub>2</sub>O-2[C<sub>n</sub>mim]<sup>+</sup>-2Br<sup>-</sup>-1 microhydrates.

| Absorp.                                                                  | Mode | Contri. | Assign.                                             | Wave | Intens. | Absorp.                                                                   | Mode | Contri. | Assign.                               | Wave | Intens. |
|--------------------------------------------------------------------------|------|---------|-----------------------------------------------------|------|---------|---------------------------------------------------------------------------|------|---------|---------------------------------------|------|---------|
| <b>T-4H<sub>2</sub>O-Br<sup>-</sup>-1</b>                                |      |         |                                                     |      |         | <b>T-3H<sub>2</sub>O-[C<sub>2</sub>mim]<sup>+</sup>-Br<sup>-</sup>-1</b>  |      |         |                                       |      |         |
| 3336                                                                     | v9   | 100     | vN1-H                                               | 3336 | 1833    | 3436                                                                      | v7   | 100     | vN1-H                                 | 3436 | 1055    |
| 3125                                                                     | v13  | 99      | vN3-H                                               | 3125 | 1622    | 3277                                                                      | v10  | 99      | vN3-H                                 | 3277 | 1098    |
| 1722                                                                     | v16  | 83      | vC2=O7 + $\rho$ N3-H<br>+ $\rho$ C6-H + $\rho$ N1-H | 1722 | 882     | 1747                                                                      | v24  | 98      | vC2=O7 + $\rho$ N1-H<br>+ $\rho$ N3-H | 1748 | 997     |
| 1705                                                                     | v15  | 97      | vC4=O8 + $\rho$ N3-H                                | 1705 | 1677    | 1713                                                                      | v26  | 98      | vC4=O8 + $\rho$ N3-H                  | 1713 | 1246    |
|                                                                          | v17  |         | vC5=C6 + $\rho$ N1-H +<br>$\rho$ C6-H + $\rho$ N3-H | 1729 | 332     |                                                                           | v25  |         | vC5=C6 + $\rho$ C6-H<br>+ $\rho$ N1-H | 1726 | 110     |
| <b>T-3H<sub>2</sub>O-[C<sub>4</sub>mim]<sup>+</sup>-Br<sup>-</sup>-1</b> |      |         |                                                     |      |         | <b>T-3H<sub>2</sub>O-[C<sub>6</sub>mim]<sup>+</sup>-Br<sup>-</sup>-1</b>  |      |         |                                       |      |         |
| 3453                                                                     | v7   | 100     | vN1-H                                               | 3453 | 975     | 3453                                                                      | v7   | 100     | vN1-H                                 | 3453 | 956     |
| 3278                                                                     | v10  | 99      | vN3-H                                               | 3278 | 1094    | 3281                                                                      | v10  | 100     | vN3-H                                 | 3281 | 1085    |
| 1749                                                                     | v28  | 98      | vC2=O7 + $\rho$ N1-H +<br>$\rho$ N3-H               | 1748 | 998     | 1749                                                                      | v32  | 98      | vC2=O7 + $\rho$ N1-H<br>+ $\rho$ N3-H | 1749 | 1006    |
| 1713                                                                     | v30  | 98      | vC4=O8 + $\rho$ N3-H                                | 1713 | 1263    | 1713                                                                      | v34  | 98      | vC4=O8 + $\rho$ N3-H                  | 1712 | 1260    |
|                                                                          | v29  |         | vC5=C6 + $\rho$ C6-H +<br>$\rho$ N1-H               | 1726 | 106     |                                                                           | v33  |         | vC5=C6 + $\rho$ C6-H<br>+ $\rho$ N1-H | 1726 | 100     |
| <b>T-3H<sub>2</sub>O-[C<sub>8</sub>mim]<sup>+</sup>-Br<sup>-</sup>-1</b> |      |         |                                                     |      |         | <b>T-3H<sub>2</sub>O-[C<sub>10</sub>mim]<sup>+</sup>-Br<sup>-</sup>-1</b> |      |         |                                       |      |         |
| 3444                                                                     | v7   | 100     | vN1-H                                               | 3443 | 1016    | 3444                                                                      | v7   | 100     | vN1-H                                 | 3444 | 1008    |
| 3280                                                                     | v10  | 99      | vN3-H                                               | 3279 | 1099    | 3281                                                                      | v10  | 99      | vN3-H                                 | 3280 | 1096    |
| 1749                                                                     | v36  | 98      | vC2=O7 + $\rho$ N1-H<br>+ $\rho$ N3-H               | 1749 | 990     | 1749                                                                      | v40  | 98      | vC2=O7 + $\rho$ N1-H<br>+ $\rho$ N3-H | 1749 | 993     |
| 1713                                                                     | v38  | 98      | vC4=O8 + $\rho$ N3-H                                | 1712 | 1254    | 1713                                                                      | v42  | 98      | vC4=O8 + $\rho$ N3-H                  | 1712 | 1251    |
|                                                                          | v37  |         | vC5=C6 + $\rho$ C6-H +<br>$\rho$ N1-H               | 1726 | 107     |                                                                           | v41  |         | vC5=C6 + $\rho$ C6-H<br>+ $\rho$ N1-H | 1726 | 112     |

**Table S7.** (continued)

| T-2H <sub>2</sub> O-[C <sub>2</sub> mim] <sup>+</sup> -2Br <sup>-</sup> -1 |    |     |                                       |      |      | T-1H <sub>2</sub> O-2[C <sub>2</sub> mim] <sup>+</sup> -2Br <sup>-</sup> -1 |     |     |                                           |      |      |
|----------------------------------------------------------------------------|----|-----|---------------------------------------|------|------|-----------------------------------------------------------------------------|-----|-----|-------------------------------------------|------|------|
| 3453                                                                       | 5  | 100 | vN1-H                                 | 3453 | 968  | 3388                                                                        | v3  | 100 | vN1-H                                     | 3388 | 1306 |
| 3320                                                                       | 7  | 98  | vN3-H                                 | 3319 | 1414 | 3310                                                                        | v5  | 95  | vN3-H                                     | 3311 | 1488 |
| 1747                                                                       | 12 | 98  | vC2=O7 + ρN1-H<br>+ ρN3-H             | 1747 | 806  | 1758                                                                        | v30 | 99  | vC2=O7 +<br>ρN1-H + ρN3-H                 | 1757 | 931  |
| 1727                                                                       | 14 | 43  | vC4=O8 + ρN3-H                        | 1708 | 1581 | 1702                                                                        | v32 | 99  | vC4=O8 + ρN3-<br>H                        | 1702 | 1484 |
| 1707                                                                       | 13 | 99  | vC5=C6 + ρC6-H<br>+ ρN1-H             | 1728 | 56   | 1722                                                                        | v31 | 42  | vC5=C6 +<br>ρC6-H + ρN1-H                 | 1722 | 65   |
| T-2H <sub>2</sub> O-[C <sub>4</sub> mim] <sup>+</sup> -2Br <sup>-</sup> -1 |    |     |                                       |      |      | T-1H <sub>2</sub> O-2[C <sub>4</sub> mim] <sup>+</sup> -2Br <sup>-</sup> -1 |     |     |                                           |      |      |
| 3461                                                                       | 5  | 100 | vN1-H                                 | 3462 | 902  | 3401                                                                        | v3  | 100 | vN1-H                                     | 3402 | 1246 |
| 3322                                                                       | 7  | 86  | vN3-H                                 | 3323 | 1251 | 3312                                                                        | v5  | 97  | vN3-H                                     | 3311 | 1514 |
| 1747                                                                       | 15 | 97  | vC2=O7 + ρN1-H<br>+ ρN3-H             | 1747 | 801  | 1758                                                                        | v38 | 99  | vC2=O7 +<br>ρN1-H + ρN3-H                 | 1758 | 936  |
| 1709                                                                       | 17 | 99  | vC4=O8 + ρN3-H                        | 1709 | 1572 | 1722                                                                        | v40 | 50  | vC4=O8 + ρN3-<br>H                        | 1703 | 1482 |
| 1729                                                                       | 16 | 39  | vC5=C6 + ρC6-H<br>+ vC4=O8 +<br>ρN1-H | 1729 | 59   | 1703                                                                        | v39 | 99  | vC5=C6 +<br>ρC6-H +<br>vC4=O8 + ρN1-<br>H | 1723 | 78   |
| T-2H <sub>2</sub> O-[C <sub>6</sub> mim] <sup>+</sup> -2Br <sup>-</sup> -1 |    |     |                                       |      |      | T-1H <sub>2</sub> O-2[C <sub>6</sub> mim] <sup>+</sup> -2Br <sup>-</sup> -1 |     |     |                                           |      |      |
| 3460                                                                       | 5  | 100 | vN1-H                                 | 3460 | 919  | 3400                                                                        | v3  | 100 | vN1-H                                     | 3399 | 1245 |
| 3320                                                                       | 7  | 99  | vN3-H                                 | 3319 | 1419 | 3314                                                                        | v5  | 95  | vN3-H                                     | 3315 | 1497 |
| 1749                                                                       | 30 | 98  | vC2=O7 + ρN1-H<br>+ ρN3-H             | 1748 | 805  | 1758                                                                        | v48 | 99  | vC2=O7 +<br>ρN1-H + ρN3-H                 | 1758 | 942  |

|                                                                            |    |     |                           |      |      |                                                                             |     |     |                           |      |      |
|----------------------------------------------------------------------------|----|-----|---------------------------|------|------|-----------------------------------------------------------------------------|-----|-----|---------------------------|------|------|
| 1710                                                                       | 32 | 99  | vC4=O8 + ρN3-H            | 1709 | 1544 | 1721                                                                        | v50 | 46  | vC4=O8 + ρN3-H            | 1703 | 1479 |
| 1727                                                                       | 31 | 48  | vC5=C6 + ρC6-H<br>+ρN1-H  | 1728 | 50   | 1702                                                                        | v49 | 99  | vC5=C6 +<br>ρC6-H +ρN1-H  | 1721 | 73   |
| <b>T-2H<sub>2</sub>O-[C<sub>8</sub>mim]<sup>+</sup>-2Br<sup>-</sup>-1</b>  |    |     |                           |      |      | <b>T-1H<sub>2</sub>O-2[C<sub>8</sub>mim]<sup>+</sup>-2Br<sup>-</sup>-1</b>  |     |     |                           |      |      |
| 3450                                                                       | 5  | 100 | vN1-H                     | 3451 | 956  | 3394                                                                        | v3  | 100 | vN1-H                     | 3394 | 1273 |
| 3317                                                                       | 7  | 99  | vN3-H                     | 3317 | 1433 | 3310                                                                        | v5  | 91  | vN3-H                     | 3310 | 1437 |
| 1749                                                                       | 34 | 98  | vC2=O7 + ρN1-H<br>+ ρN3-H | 1749 | 807  | 1758                                                                        | v54 | 99  | vC2=O7 +<br>ρN1-H + ρN3-H | 1758 | 936  |
| 1709                                                                       | 36 | 99  | vC4=O8 + ρN3-H            | 1709 | 1522 | 1703                                                                        | v51 | 99  | vC4=O8 + ρN3-H            | 1703 | 1480 |
| 1729                                                                       | 35 | 39  | vC5=C6 + ρC6-H<br>+ ρN1-H | 1729 | 62   | 1721                                                                        | v50 | 48  | vC5=C6 +<br>ρC6-H +ρN1-H  | 1722 | 70   |
| <b>T-2H<sub>2</sub>O-[C<sub>10</sub>mim]<sup>+</sup>-2Br<sup>-</sup>-1</b> |    |     |                           |      |      | <b>T-1H<sub>2</sub>O-2[C<sub>10</sub>mim]<sup>+</sup>-2Br<sup>-</sup>-1</b> |     |     |                           |      |      |
| 3454                                                                       | 5  | 100 | vN1-H                     | 3455 | 914  | 3396                                                                        | v3  | 100 | vN1-H                     | 310  | 1257 |
| 3318                                                                       | 7  | 98  | vN3-H                     | 3318 | 1407 | 3313                                                                        | v5  | 84  | vN3-H                     | 3313 | 1330 |
| 1749                                                                       | 38 | 98  | vC2=O7 + ρN1-H<br>+ ρN3-H | 1748 | 800  | 1758                                                                        | v63 | 99  | vC2=O7 +<br>ρN1-H + ρN3-H | 1757 | 934  |
| 1727                                                                       | 40 | 46  | vC4=O8 + ρN3-H            | 1709 | 1540 | 1703                                                                        | v65 | 99  | vC4=O8 + ρN3-H            | 1703 | 1488 |
| 1709                                                                       | 39 | 99  | vC5=C6 + ρC6-H<br>+ρN1-H  | 1728 | 52   | 1722                                                                        | v64 | 48  | vC5=C6 +<br>ρC6-H + ρN1-H | 1723 | 73   |

**Table S8.** NPA charge and charge transfer in the most stable T-4H<sub>2</sub>O-Br<sup>-</sup>-1, T-3H<sub>2</sub>O-[C<sub>n</sub>mim]<sup>+</sup>-Br<sup>-</sup>-1, T-2H<sub>2</sub>O-[C<sub>n</sub>mim]<sup>+</sup>-2Br<sup>-</sup>-1, and T-1H<sub>2</sub>O-2[C<sub>n</sub>mim]<sup>+</sup>-2Br<sup>-</sup>-1 micro-hydrates with respect to the corresponding isolated fragment, respectively (in a.u.).

|                                                                             | <b>T</b> | <b>[C<sub>n</sub>mim]<sup>+</sup></b> | <b>Br<sup>-</sup></b> | <b>H<sub>2</sub>O</b> |
|-----------------------------------------------------------------------------|----------|---------------------------------------|-----------------------|-----------------------|
| <b>Monomer</b>                                                              | 0.000    | 1.000                                 | -1.000                | 0.000                 |
| <b>T-4H<sub>2</sub>O-Br<sup>-</sup>-1</b>                                   | -0.041   | -                                     | -0.929                | -0.030                |
| <b>T-3H<sub>2</sub>O-[C<sub>2</sub>mim]<sup>+</sup>-Br<sup>-</sup>-1</b>    | -0.028   | 0.965                                 | -0.931                | -0.005                |
| <b>T-3H<sub>2</sub>O-[C<sub>4</sub>mim]<sup>+</sup>-Br<sup>-</sup>-1</b>    | -0.025   | 0.963                                 | -0.932                | -0.005                |
| <b>T-3H<sub>2</sub>O-[C<sub>6</sub>mim]<sup>+</sup>-Br<sup>-</sup>-1</b>    | -0.025   | 0.963                                 | -0.932                | -0.006                |
| <b>T-3H<sub>2</sub>O-[C<sub>8</sub>mim]<sup>+</sup>-Br<sup>-</sup>-1</b>    | -0.027   | 0.963                                 | -0.931                | -0.005                |
| <b>T-3H<sub>2</sub>O-[C<sub>10</sub>mim]<sup>+</sup>-Br<sup>-</sup>-1</b>   | -0.027   | 0.963                                 | -0.931                | -0.005                |
| <b>T-2H<sub>2</sub>O-[C<sub>2</sub>mim]<sup>+</sup>-2Br<sup>-</sup>-1</b>   | -0.046   | 0.957                                 | -1.858                | -0.053                |
| <b>T-2H<sub>2</sub>O-[C<sub>4</sub>mim]<sup>+</sup>-2Br<sup>-</sup>-1</b>   | -0.044   | 0.955                                 | -1.859                | -0.052                |
| <b>T-2H<sub>2</sub>O-[C<sub>6</sub>mim]<sup>+</sup>-2Br<sup>-</sup>-1</b>   | -0.044   | 0.955                                 | -1.859                | -0.052                |
| <b>T-2H<sub>2</sub>O-[C<sub>8</sub>mim]<sup>+</sup>-2Br<sup>-</sup>-1</b>   | -0.046   | 0.955                                 | -1.858                | -0.052                |
| <b>T-2H<sub>2</sub>O-[C<sub>10</sub>mim]<sup>+</sup>-2Br<sup>-</sup>-1</b>  | -0.044   | 0.955                                 | -1.859                | -0.052                |
| <b>T-1H<sub>2</sub>O-2[C<sub>2</sub>mim]<sup>+</sup>-2Br<sup>-</sup>-1</b>  | -0.080   | 1.967                                 | -1.862                | -0.025                |
| <b>T-1H<sub>2</sub>O-2[C<sub>4</sub>mim]<sup>+</sup>-2Br<sup>-</sup>-1</b>  | -0.077   | 1.965                                 | -1.863                | -0.025                |
| <b>T-1H<sub>2</sub>O-2[C<sub>6</sub>mim]<sup>+</sup>-2Br<sup>-</sup>-1</b>  | -0.077   | 1.964                                 | -1.863                | -0.025                |
| <b>T-1H<sub>2</sub>O-2[C<sub>8</sub>mim]<sup>+</sup>-2Br<sup>-</sup>-1</b>  | -0.078   | 1.966                                 | -1.863                | -0.025                |
| <b>T-1H<sub>2</sub>O-2[C<sub>10</sub>mim]<sup>+</sup>-2Br<sup>-</sup>-1</b> | -0.077   | 1.965                                 | -1.863                | -0.025                |
