# Supplementary material for: Density Functional Method Study on the Cooperativity of Intermolecular H-bonding and π-π+ Stacking Interactions in Thymine-[Cnmim]Br (n = 2, 4, 6, 8, 10) Microhydrates
Source: MDPI journal article supplement (doi:10.3390/molecules27196242), 2022-09-22
Supplement: s1 [file s1]

## Density Functional Method Study on the Cooperativity of Intermolecular H-bonding and $\pi$ - $\pi^+$ Stacking Interactions in Thymine- $[\text{C}_n\text{mim}]\text{Br}$ ( $n = 2, 4, 6, 8, 10$ ) Microhydrates

Yanni Wang<sup>1</sup>, Chaowu Dai<sup>1</sup>, Wei Huang<sup>1</sup>, Tingting Ni<sup>2</sup>, Jianping Cao<sup>2</sup>, Jiangmei Pang<sup>2</sup>, Huining Wei<sup>2</sup> and Chaojie Wang<sup>2\*</sup>

<sup>1</sup>The Third Affiliated Hospital of Wenzhou Medical University; the Pharmacy Department of Ruian People's Hospital, Wenzhou 325000, Zhejiang, China.

<sup>2</sup>School of Pharmaceutical Sciences, Wenzhou Medical University, Wenzhou 325035, Zhejiang, China.

\* Correspondence: chjwang@wmu.edu.cn

### Contents

|                                                                                                                                                                                                                                                                                                                                                                                                                                                                     |    |
|---------------------------------------------------------------------------------------------------------------------------------------------------------------------------------------------------------------------------------------------------------------------------------------------------------------------------------------------------------------------------------------------------------------------------------------------------------------------|----|
| <b>Figure S1.</b> Optimized molecular structures of micro-hydrated T- $w\text{H}_2\text{O}$ ( $w = 1, 2, 3, 4, 5$ ) at the M06-2X/6-311++G(2d, p)/PCM/water level. The ZPVE-corrected stability decreases from left to right (in kJ/mol). .....                                                                                                                                                                                                                     | 2  |
| <b>Figure S2.</b> Optimized molecular structures of mono-anionic T- $w\text{H}_2\text{O}-\text{Br}^-$ ( $w = 1, 2, 3$ ) at the M06-2X/6-311++G(2d, p)/PCM/water level. The ZPVE-corrected stability decreases from left to right (in kJ/mol). .....                                                                                                                                                                                                                 | 5  |
| <b>Figure S3.</b> 11 of the mono-cationic structures of thymine with five imidazolium cations (T- $[\text{C}_n\text{mim}]^+$ , $n = 2, 4, 6, 8, 10$ ) calculated at the M06-2X/6-311++G(2d, p)/PCM/water level of theory. The ZPVE-corrected stability decreases from top to bottom for each configuration (in kJ/mol). .....                                                                                                                                       | 15 |
| <b>Figure S4.</b> 12 of the di-ionic structures of thymine with five imidazolium ILs (T- $[\text{C}_n\text{mim}]^+-\text{Br}^-$ , $n = 2, 4, 6, 8, 10$ ) calculated at the M06-2X/6-311++G(2d, p)/PCM/water level of theory. The ZPVE-corrected stability decreases from top to bottom for each configuration (in kJ/mol). .....                                                                                                                                    | 25 |
| <b>Figure S5.</b> 3 of the tri-ionic structures of thymine with five imidazolium ILs (T- $[\text{C}_n\text{mim}]^+-2\text{Br}^-$ , $n = 2, 4, 6, 8, 10$ ) based on the stacking, perpendicular, and coplanar configurations and calculated at the M06-2X/6-311++G(2d, p)/PCM/water level of theory. The ZPVE-corrected stability decreases from left to right (in kJ/mol). .....                                                                                    | 28 |
| <b>Figure S6.</b> 3 of the tetra-ionic structures of thymine with five imidazolium ILs (T- $2[\text{C}_n\text{mim}]^+-2\text{Br}^-$ , $n = 2, 4, 6, 8, 10$ ) based on the stacking, perpendicular, and coplanar configurations and calculated at the M06-2X/6-311++G(2d, p)/PCM/water level of theory. The ZPVE-corrected stability decreases from left to right (in kJ/mol). .....                                                                                 | 32 |
| <b>Figure S7.</b> Optimized molecular structures of micro-hydrated T- $w\text{H}_2\text{O}-[\text{C}_n\text{mim}]^+-\text{Br}^-$ ( $w = 1, 2$ and $n = 2, 4, 6, 8, 10$ ) at the M06-2X/6-311++G(2d, p)/PCM/water level. The ZPVE-corrected stability decreases from left to right (in kJ/mol). .....                                                                                                                                                                | 37 |
| <b>Figure S8.</b> The isosurface maps of the frontier molecular orbitals for the isolated T, micro-hydrated T- $4\text{H}_2\text{O}-\text{Br}^-$ -1, T- $3\text{H}_2\text{O}-[\text{C}_n\text{mim}]^+-\text{Br}^-$ -1, T- $2\text{H}_2\text{O}-[\text{C}_n\text{mim}]^+-2\text{Br}^-$ -1, and T- $1\text{H}_2\text{O}-2[\text{C}_n\text{mim}]^+-2\text{Br}^-$ -1 species calculated at the TD-M06-2X/6-311++G(2d, p)/PCM/water level (isovalues = 0.01 a.u.). ..... | 43 |

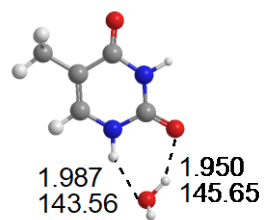

T-1H<sub>2</sub>O-1 (0.00)

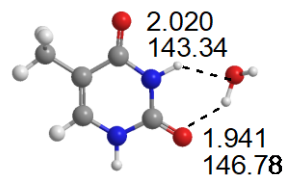

T-1H<sub>2</sub>O-2 (0.65)

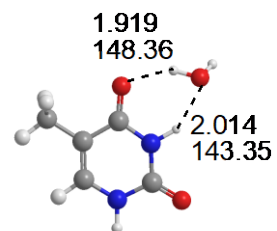

T-1H<sub>2</sub>O-3 (0.80)

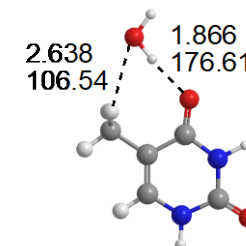

T-1H<sub>2</sub>O-4 (4.92)

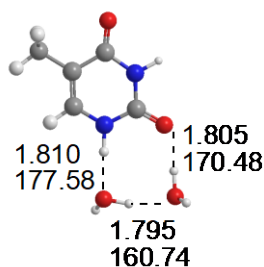

T-2H<sub>2</sub>O-1 (0.00)

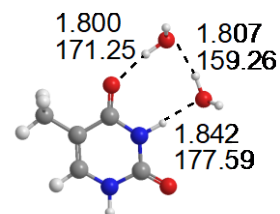

T-2H<sub>2</sub>O-2 (1.71)

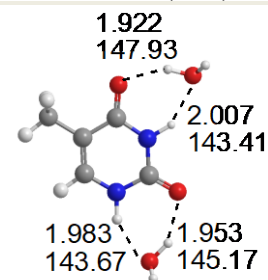

T-2H<sub>2</sub>O-3 (6.50)

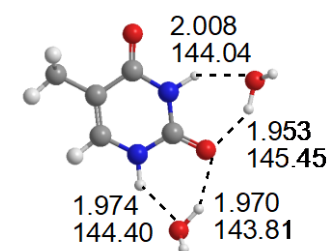

T-2H<sub>2</sub>O-4 (6.80)

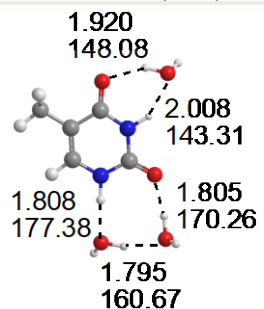

T-3H<sub>2</sub>O-1 (0.00)

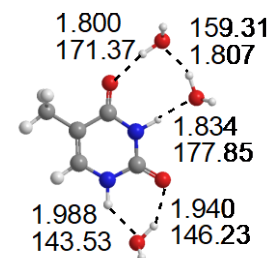

T-3H<sub>2</sub>O-2 (0.80)

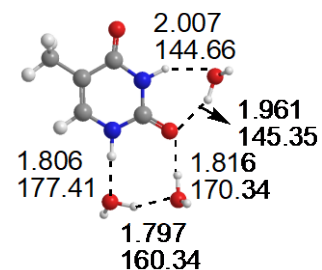

T-3H<sub>2</sub>O-3 (1.25)

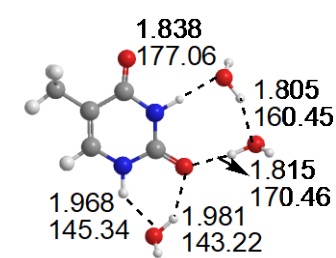

T-3H<sub>2</sub>O-4 (2.10)

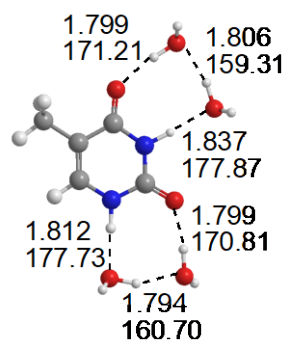

T-4H<sub>2</sub>O-1 (0.00)

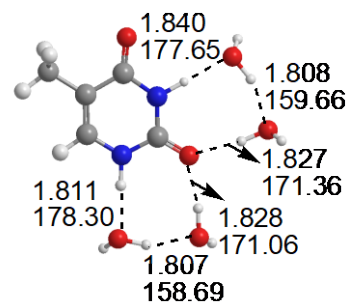

T-4H<sub>2</sub>O-2 (2.21)

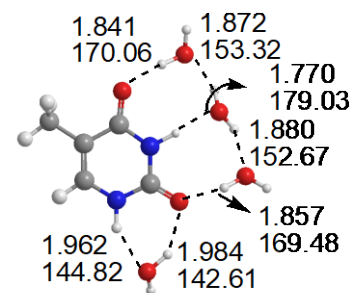

T-4H<sub>2</sub>O-3 (4.07)

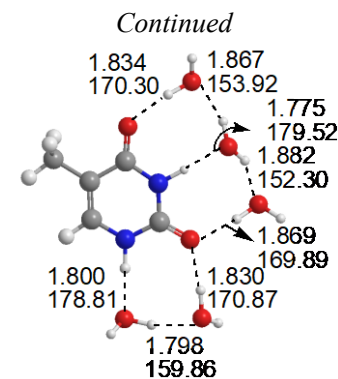

T-5H<sub>2</sub>O-1 (-97.39 kJ/mol)

**Figure S1.** Optimized molecular structures of micro-hydrated T- $w$ H<sub>2</sub>O ( $w = 1, 2, 3, 4, 5$ ) at the M06-2X/6-311++G(2*d*, *p*)/PCM/water level. The ZPVE-corrected stability decreases from left to right (in kJ/mol), but T-5H<sub>2</sub>O-1 system the binding energy listed.

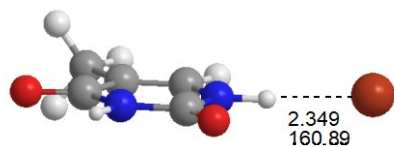

T-Br-1 (0.00)

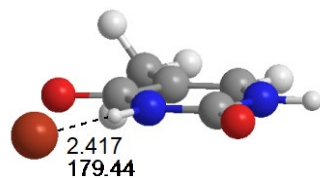

T-Br-2 (5.71)

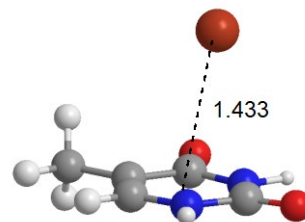

T-Br-3 (15.75)

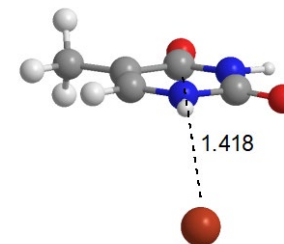

T-Br-4 (15.76)

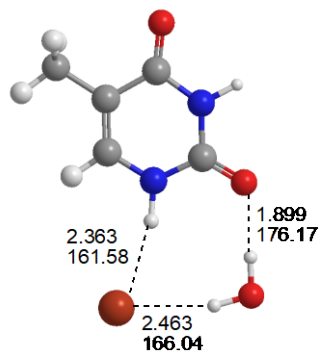

T-1H<sub>2</sub>O-Br-1 (0.00)

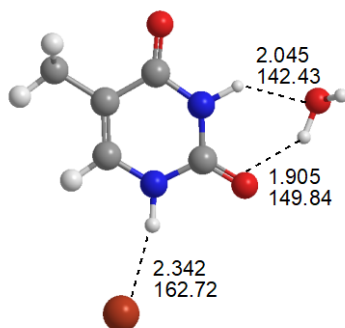

T-1H<sub>2</sub>O-Br-2 (5.58)

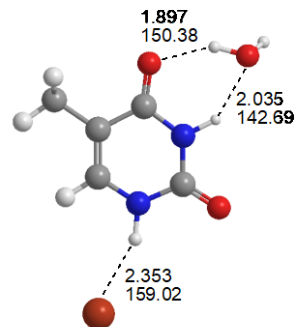

T-1H<sub>2</sub>O-Br-3 (5.56)

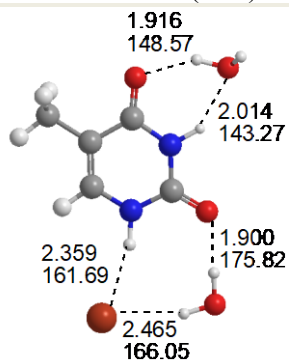

T-2H<sub>2</sub>O-Br-1 (0.00)

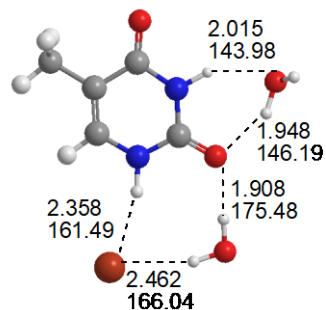

T-2H<sub>2</sub>O-Br-2 (0.66)

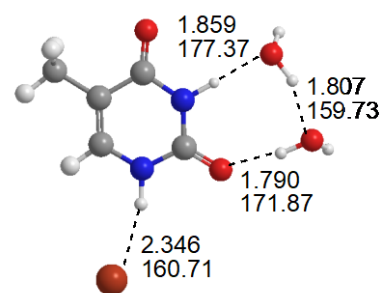

T-2H<sub>2</sub>O-Br-3 (0.79)

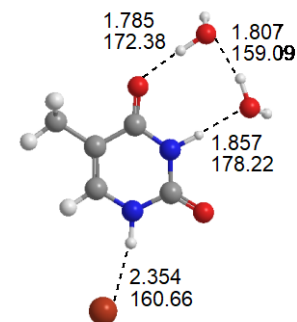

T-2H<sub>2</sub>O-Br-4 (1.17)



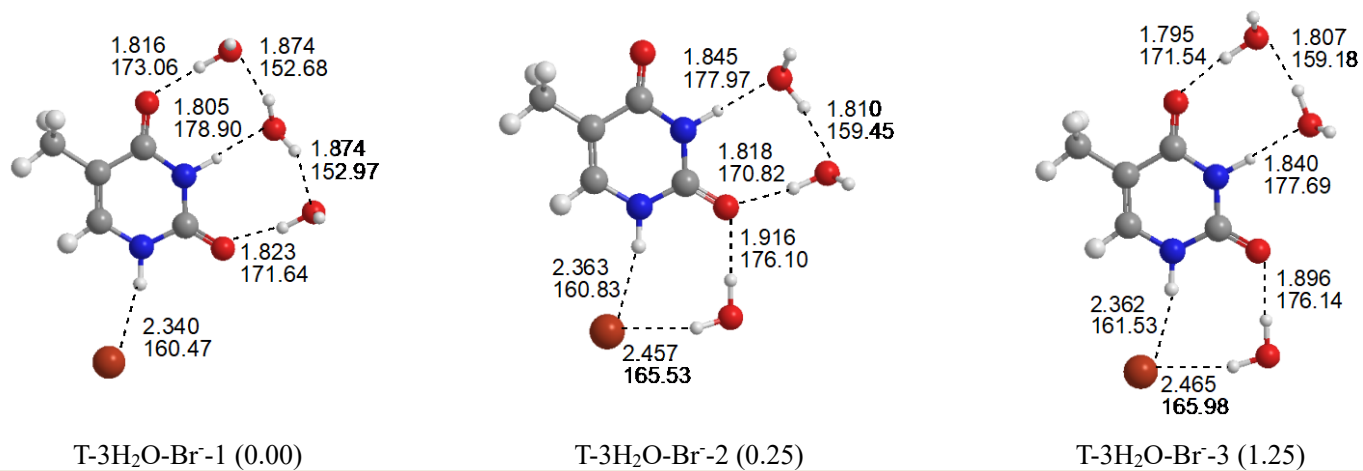

**Figure S2.** Optimized molecular structures of mono-anionic T- $w$ H<sub>2</sub>O-Br<sup>-</sup> ( $w = 1, 2, 3$ ) at the M06-2X/6-311++G(2d, p)/PCM/water level. The ZPVE-corrected stability decreases from left to right (in kJ/mol).

### Stacking (S)

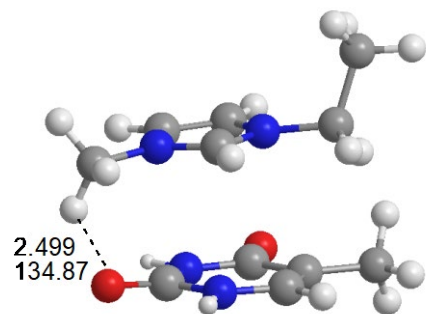

T-[C<sub>2</sub>mim]<sup>+</sup>-1 (0.00)

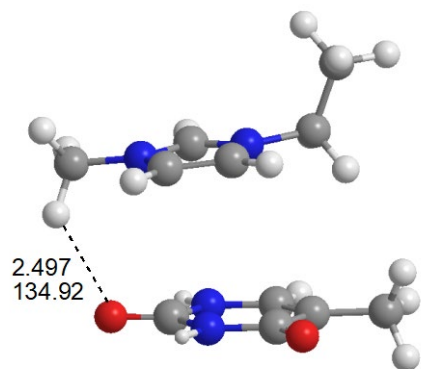

T-[C<sub>2</sub>mim]<sup>+</sup>-2 (0.10)

### Perpendicular (P)

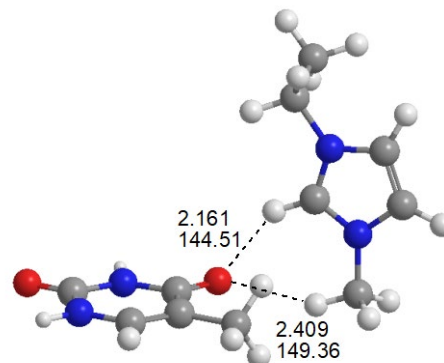

T-[C<sub>2</sub>mim]<sup>+</sup>-5 (0.00)

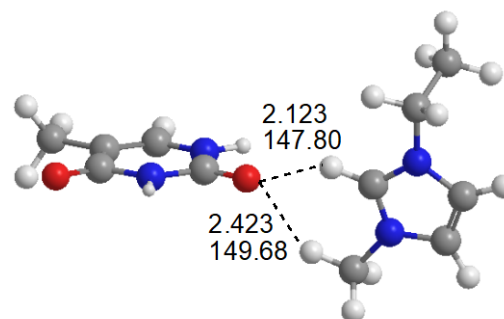

T-[C<sub>2</sub>mim]<sup>+</sup>-6 (3.07)

### Coplanar (H)

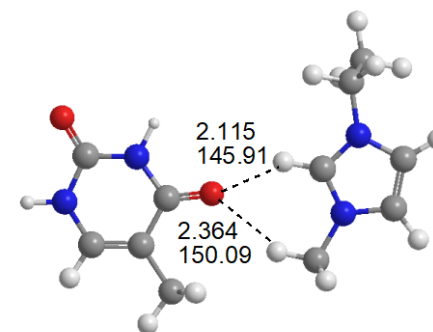

T-[C<sub>2</sub>mim]<sup>+</sup>-9 (0.00)

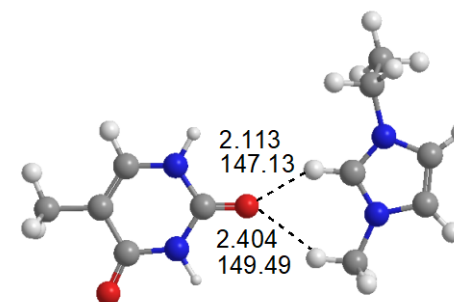

T-[C<sub>2</sub>mim]<sup>+</sup>-10 (1.79)

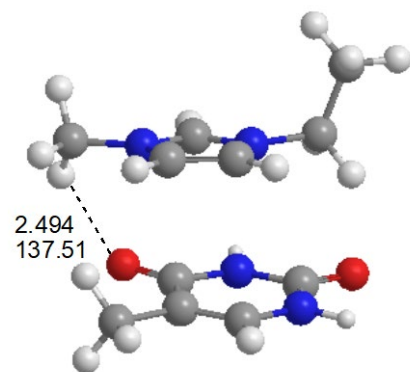

T-[C<sub>2</sub>mim]<sup>+</sup>-3 (0.23)

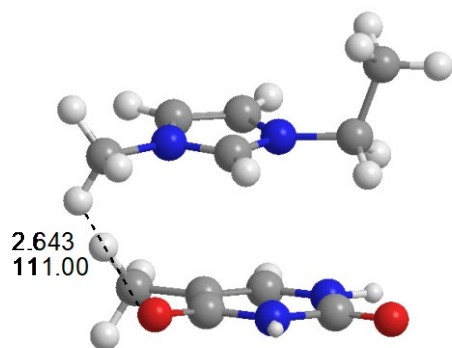

T-[C<sub>2</sub>mim]<sup>+</sup>-4 (0.24)

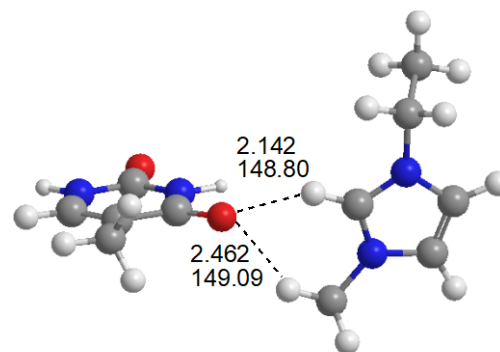

T-[C<sub>2</sub>mim]<sup>+</sup>-7 (3.10)

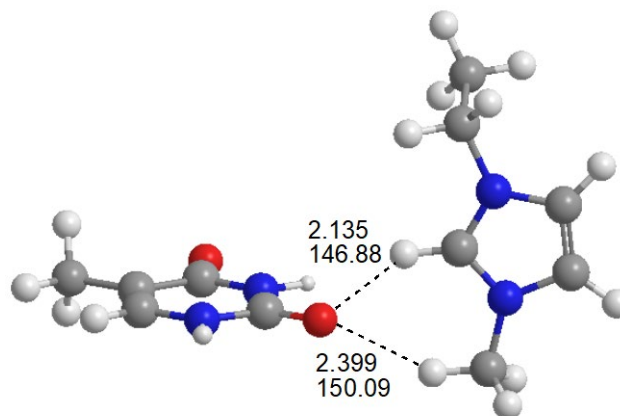

T-[C<sub>2</sub>mim]<sup>+</sup>-8 (3.40)

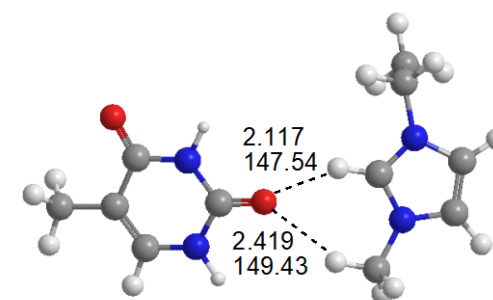

T-[C<sub>2</sub>mim]<sup>+</sup>-11 (2.15)

*Continued*

### Stacking (S)

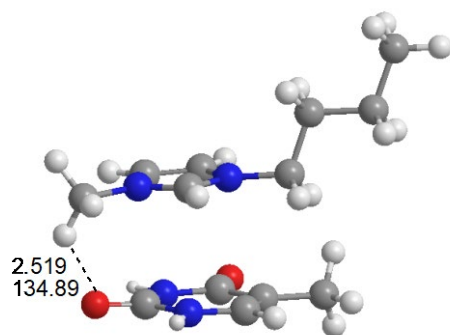

T-[C4mim]<sup>+</sup>-1 (0.00)

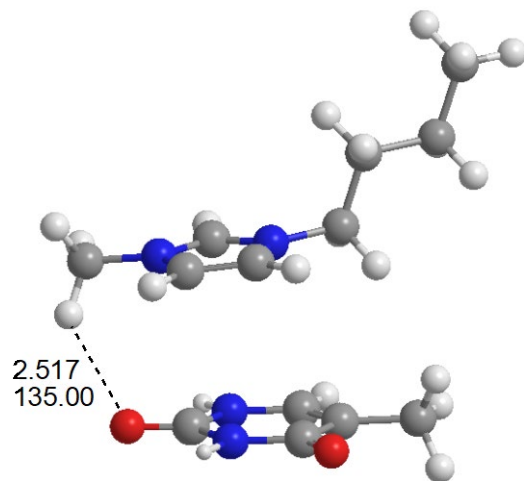

T-[C4mim]<sup>+</sup>-2 (0.01)

### Perpendicular (P)

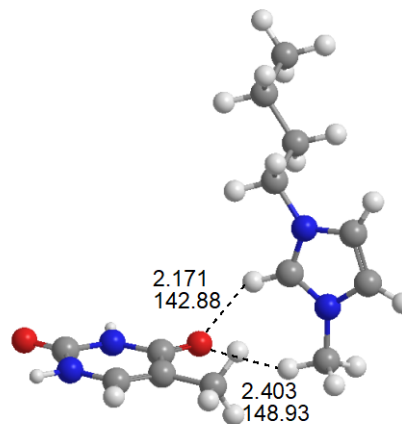

T-[C4mim]<sup>+</sup>-5 (0.00)

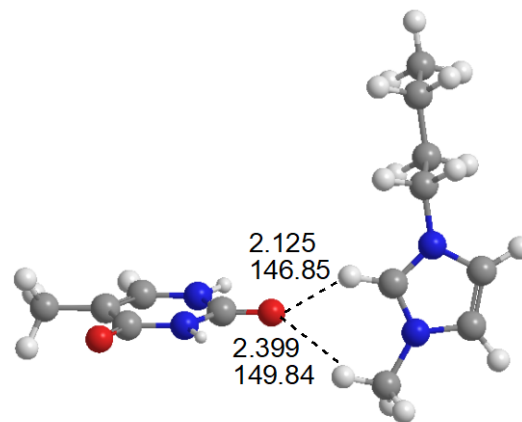

T-[C4mim]<sup>+</sup>-6 (2.13)

### Coplanar (H)

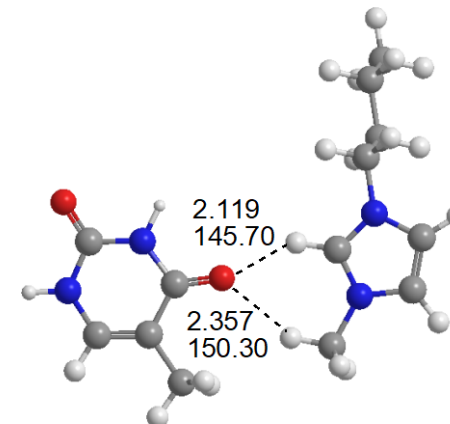

T-[C4mim]<sup>+</sup>-9 (0.00)

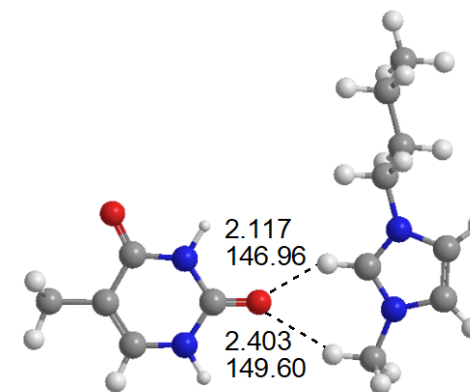

T-[C4mim]<sup>+</sup>-10 (2.13)

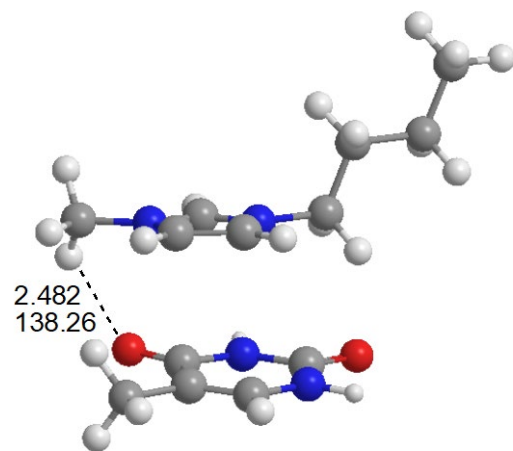

T-[C4mim]<sup>+</sup>-3 (0.02)

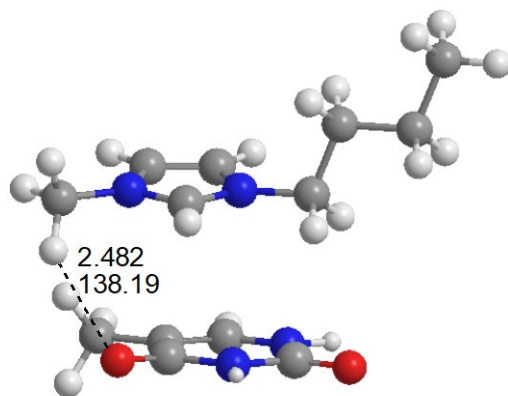

T-[C4mim]<sup>+</sup>-4 (0.04)

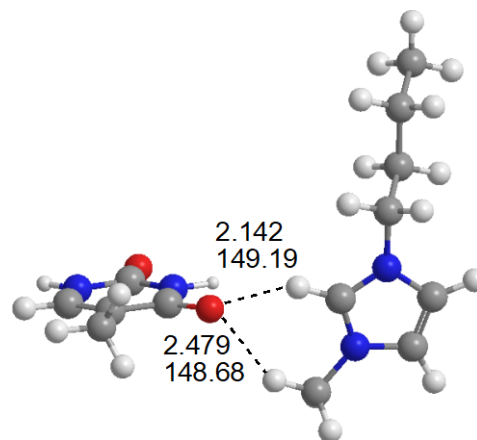

T-[C4mim]<sup>+</sup>-7 (2.61)

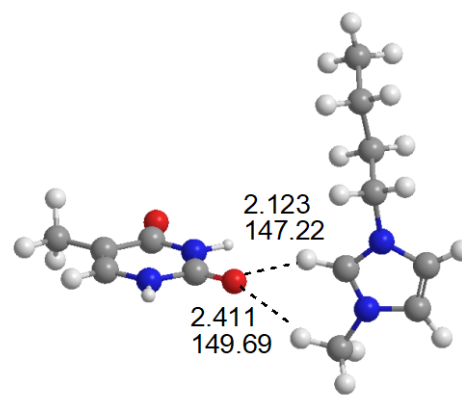

T-[C4mim]<sup>+</sup>-8 (2.91)

*Continued*

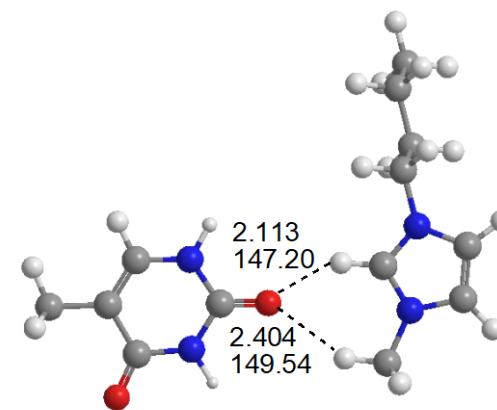

T-[C4mim]<sup>+</sup>-11 (2.40)

### Stacking (S)

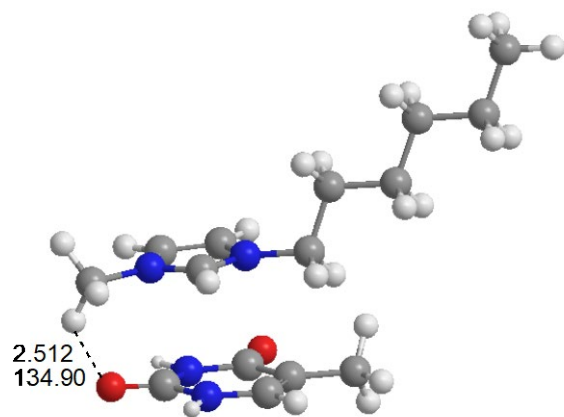

T-[C<sub>6</sub>mim]<sup>+</sup>-1 (0.00)

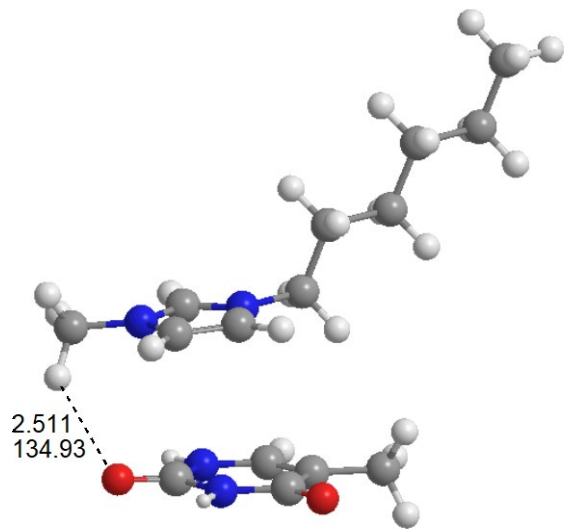

T-[C<sub>6</sub>mim]<sup>+</sup>-2 (0.04)

### Perpendicular (P)

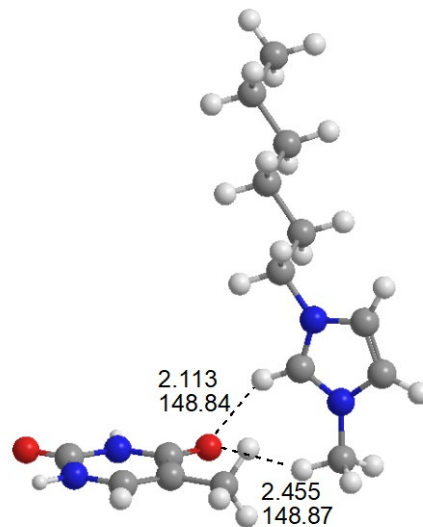

T-[C<sub>6</sub>mim]<sup>+</sup>-5 (0.00)

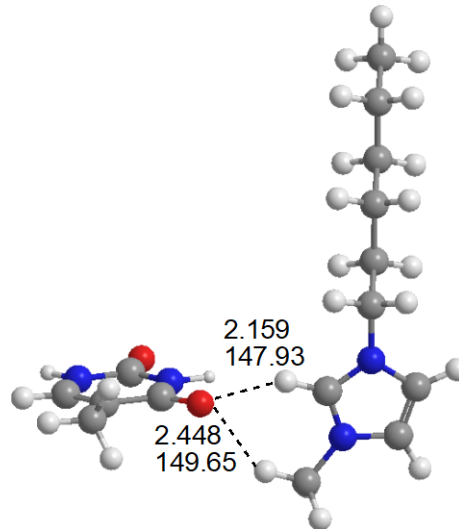

T-[C<sub>6</sub>mim]<sup>+</sup>-6 (3.29)

### Coplanar (H)

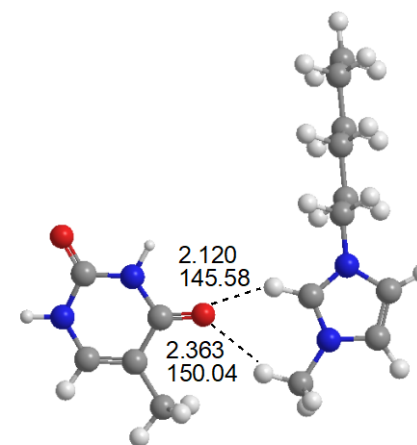

T-[C<sub>6</sub>mim]<sup>+</sup>-9 (0.00)

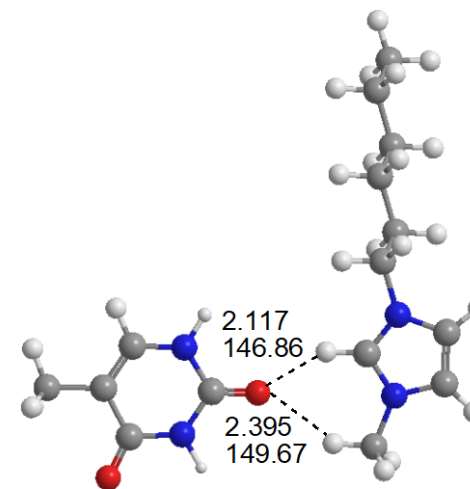

T-[C<sub>6</sub>mim]<sup>+</sup>-10 (2.00)

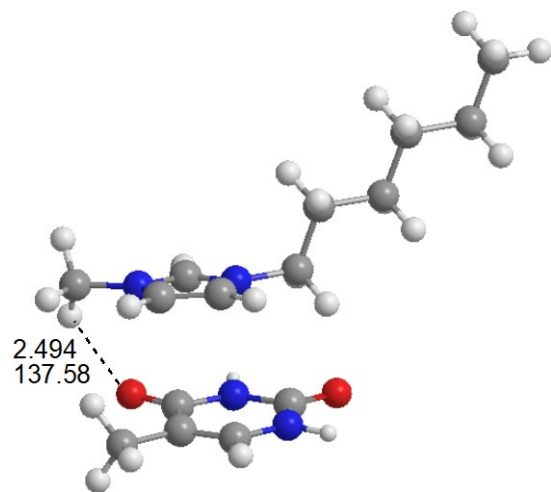

T-[C<sub>6</sub>mim]<sup>+</sup>-3 (0.27)

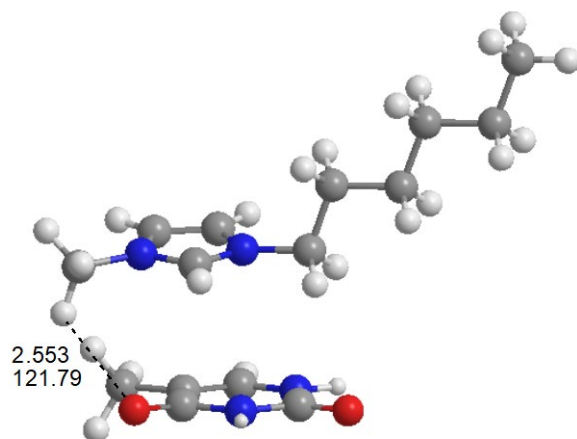

T-[C<sub>6</sub>mim]<sup>+</sup>-4 (0.73)

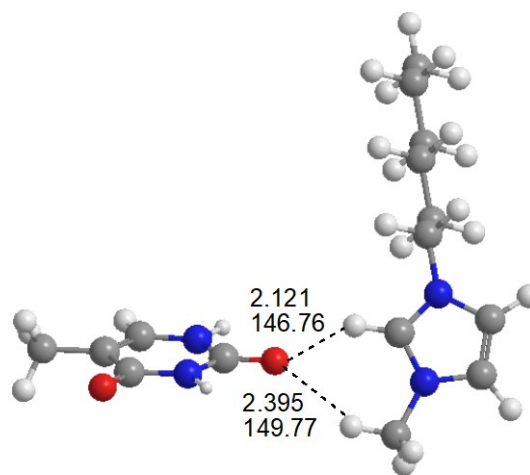

T-[C<sub>6</sub>mim]<sup>+</sup>-7 (3.52)

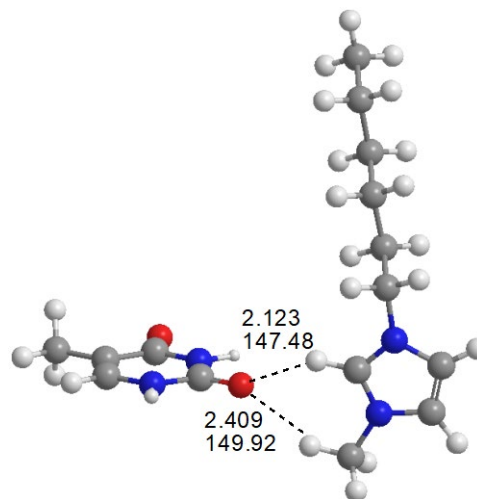

T-[C<sub>6</sub>mim]<sup>+</sup>-8 (3.77)

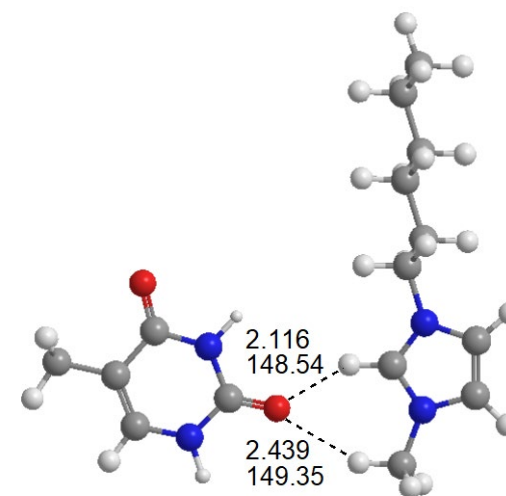

T-[C<sub>6</sub>mim]<sup>+</sup>-11 (2.37)

*Continued*

### Stacking (S)

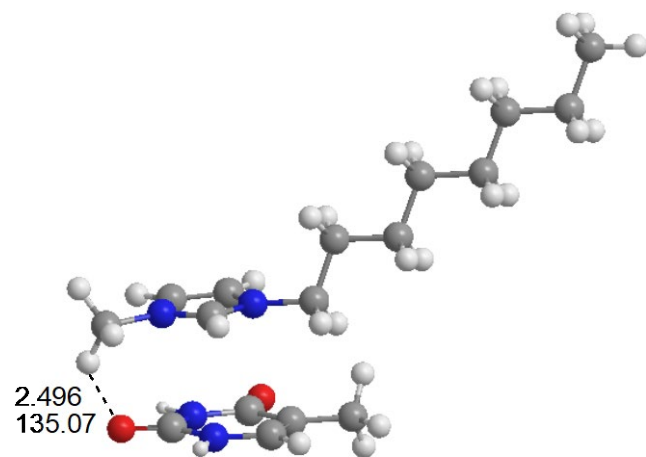

T-[C<sub>8</sub>mim]<sup>+</sup>-1 (0.00)

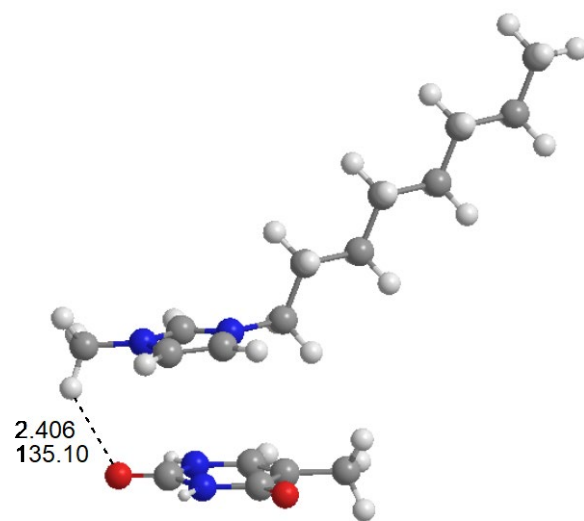

T-[C<sub>8</sub>mim]<sup>+</sup>-2 (0.01)

### Perpendicular (P)

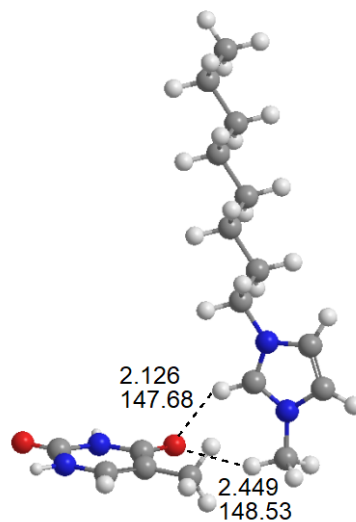

T-[C<sub>8</sub>mim]<sup>+</sup>-5 (0.00)

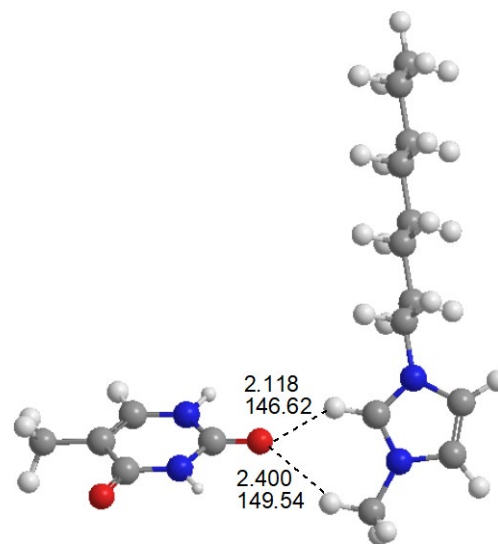

T-[C<sub>8</sub>mim]<sup>+</sup>-6 (3.44)

### Coplanar (H)

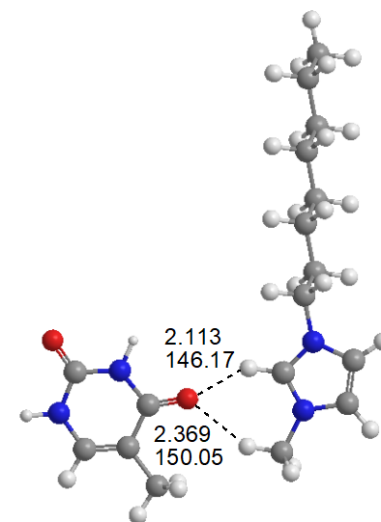

T-[C<sub>8</sub>mim]<sup>+</sup>-9 (0.00)

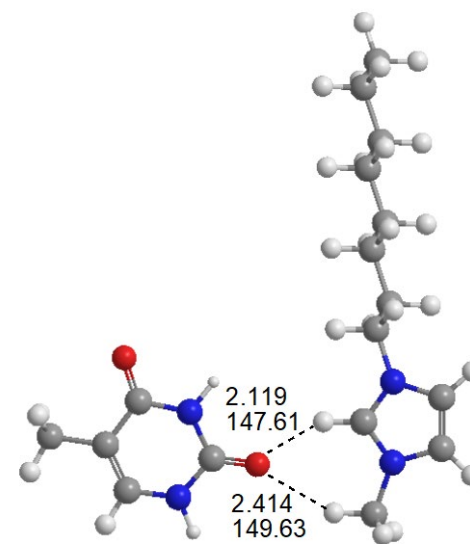

T-[C<sub>8</sub>mim]<sup>+</sup>-10 (2.17)



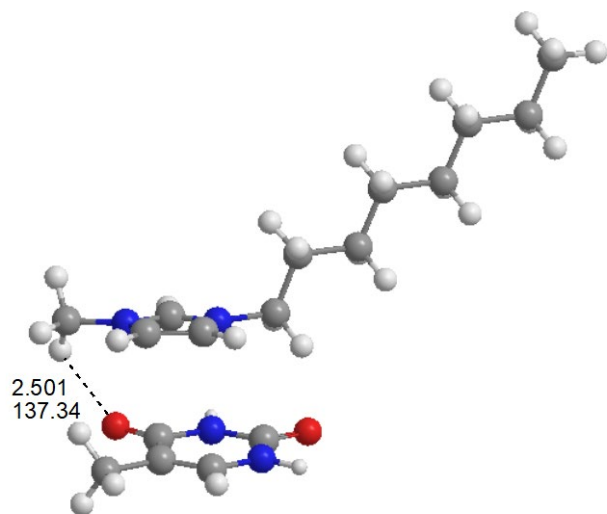

T-[C<sub>8</sub>mim]<sup>+</sup>-3 (0.77)

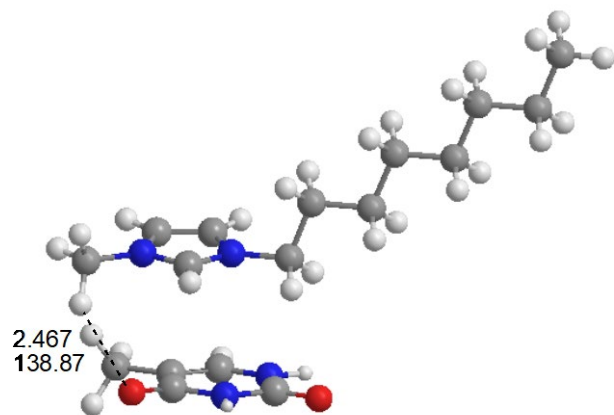

T-[C<sub>8</sub>mim]<sup>+</sup>-4 (0.85)

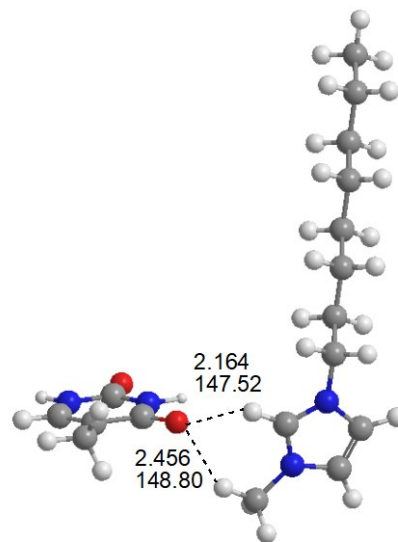

T-[C<sub>8</sub>mim]<sup>+</sup>-7 (3.80)

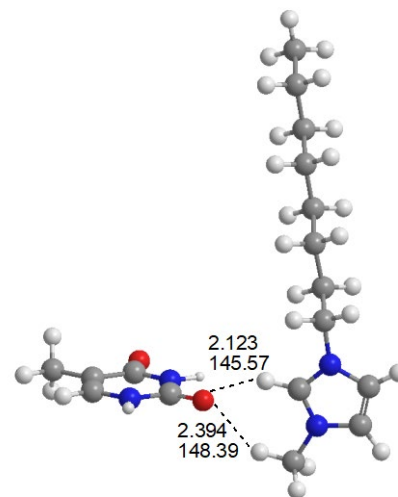

T-[C<sub>8</sub>mim]<sup>+</sup>-8 (4.07)

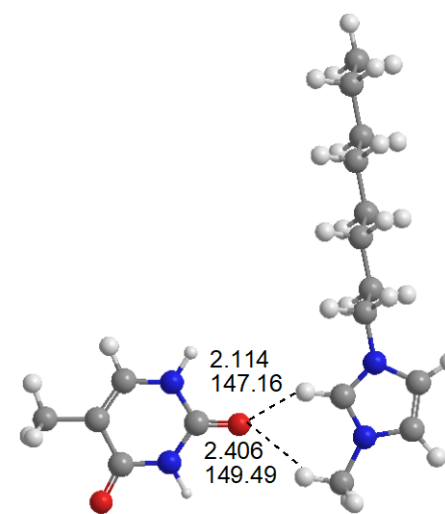

T-[C<sub>8</sub>mim]<sup>+</sup>-11 (2.26)

*Continued*

### Stacking (S)

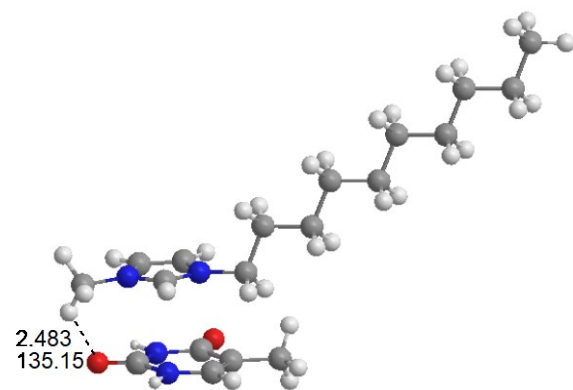

T-[C<sub>10</sub>mim]<sup>+</sup>-1 (0.00)

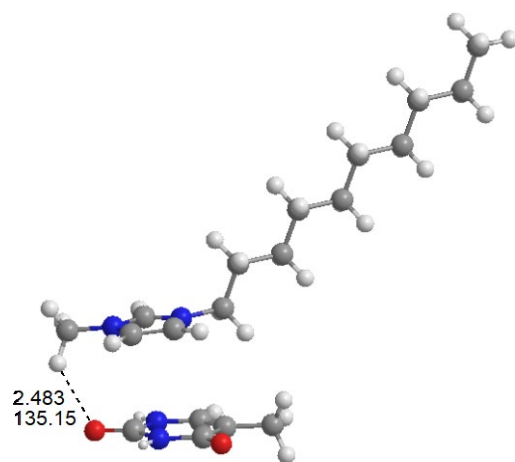

T-[C<sub>10</sub>mim]<sup>+</sup>-2 (0.34)

### Perpendicular (P)

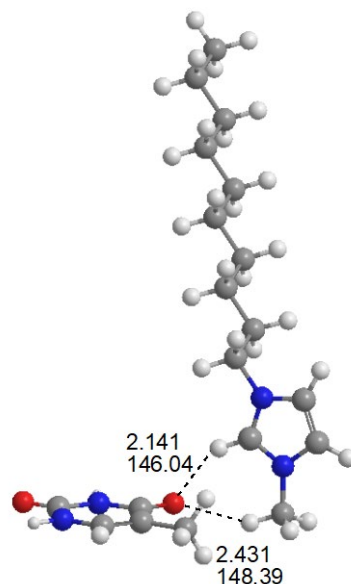

T-[C<sub>10</sub>mim]<sup>+</sup>-5 (0.00)

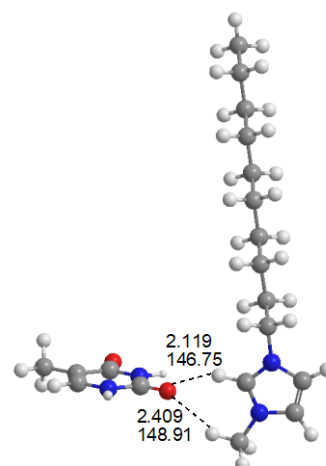

T-[C<sub>10</sub>mim]<sup>+</sup>-6 (1.45)

### Coplanar (H)

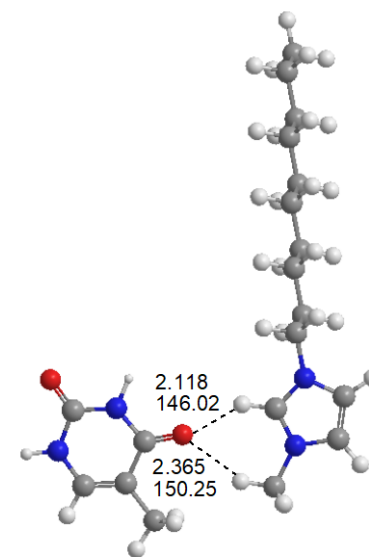

T-[C<sub>10</sub>mim]<sup>+</sup>-9 (0.00)

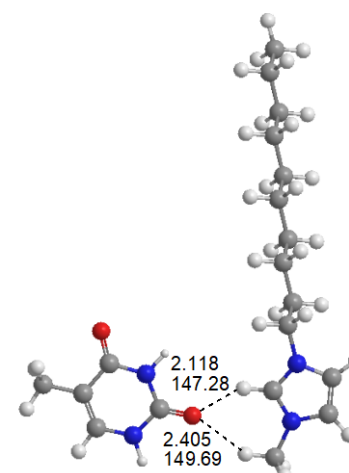

T-[C<sub>10</sub>mim]<sup>+</sup>-10 (1.18)

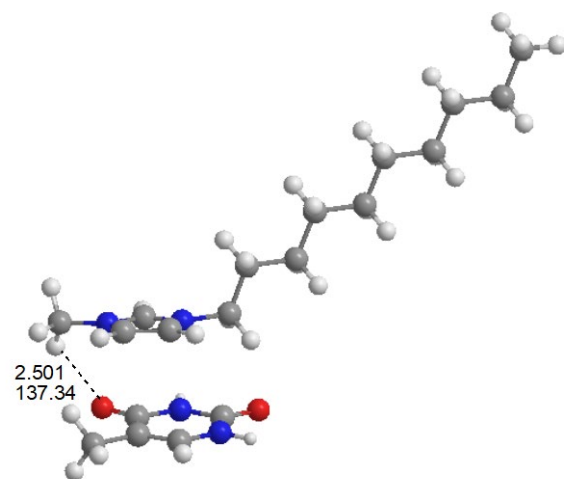T-[C<sub>10</sub>mim]<sup>+</sup>-3 (1.15)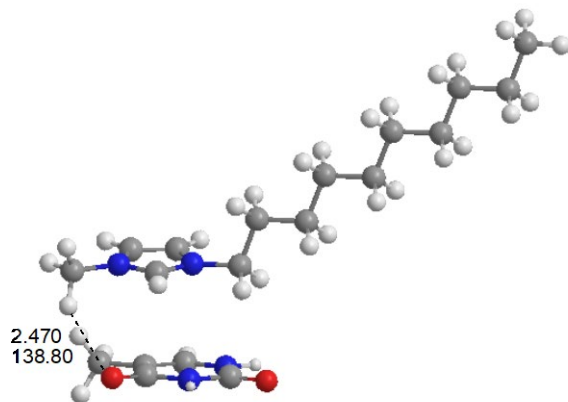T-[C<sub>10</sub>mim]<sup>+</sup>-4 (1.42)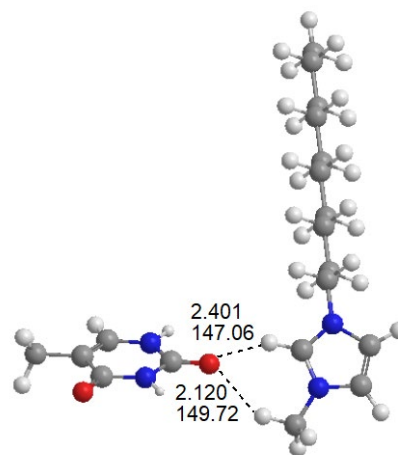T-[C<sub>10</sub>mim]<sup>+</sup>-7 (2.91)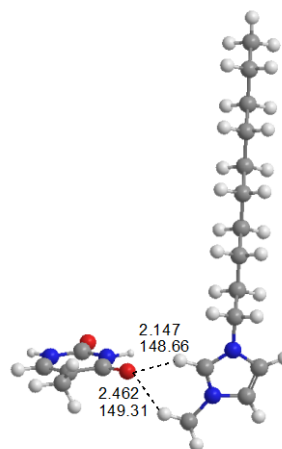T-[C<sub>10</sub>mim]<sup>+</sup>-9 (3.45)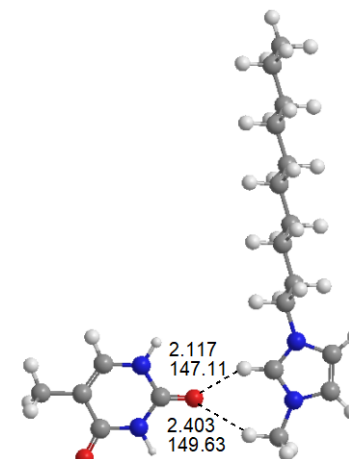T-[C<sub>10</sub>mim]<sup>+</sup>-11 (1.49)

**Figure S3.** 11 of the mono-cationic structures of thymine with five imidazolium cations (T-[C<sub>n</sub>mim]<sup>+</sup>, n = 2, 4, 6, 8, 10) calculated at the M06-2X/6-311++G(2d, p)/PCM/water level of theory. The ZPVE-corrected stability decreases from top to bottom for each configuration (in kJ/mol).

### Stacking (S)

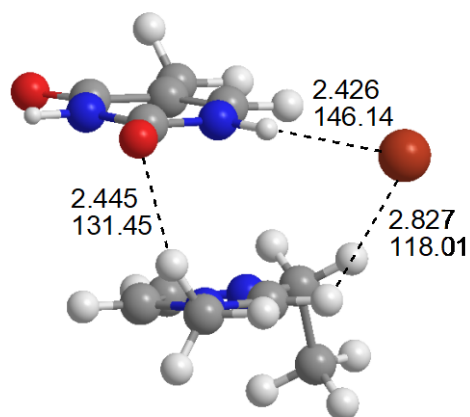

T-[C<sub>2</sub>mim]<sup>+</sup>-Br<sup>-</sup>-1 (0.00)

### Perpendicular (P)

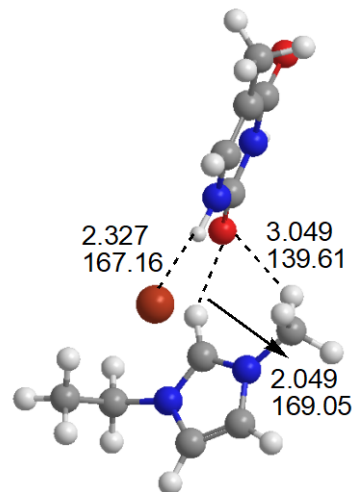

T-[C<sub>2</sub>mim]<sup>+</sup>-Br<sup>-</sup>-5 (0.00)

### Coplanar (H)

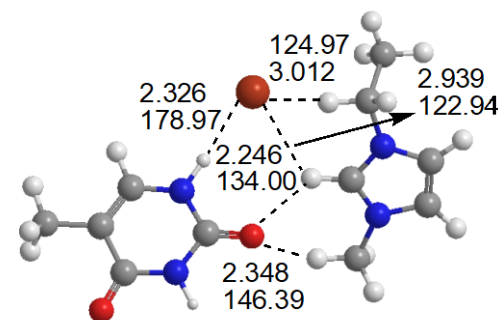

T-[C<sub>2</sub>mim]<sup>+</sup>-Br<sup>-</sup>-9 (0.00)

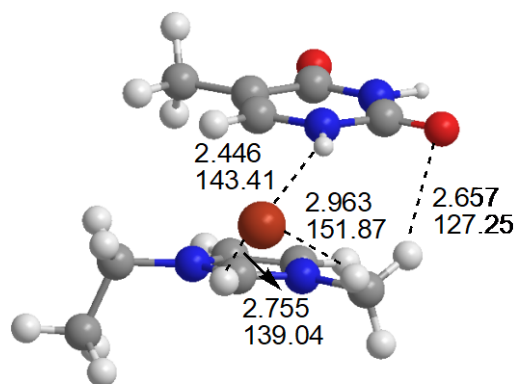

T-[C<sub>2</sub>mim]<sup>+</sup>-Br<sup>-</sup>-2 (2.57)

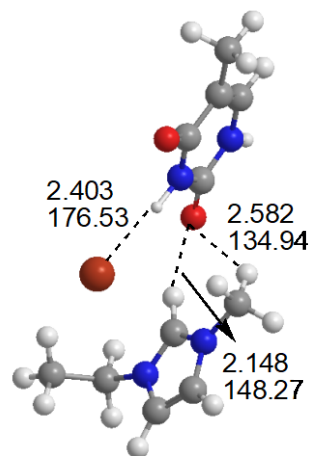

T-[C<sub>2</sub>mim]<sup>+</sup>-Br<sup>-</sup>-6 (4.83)

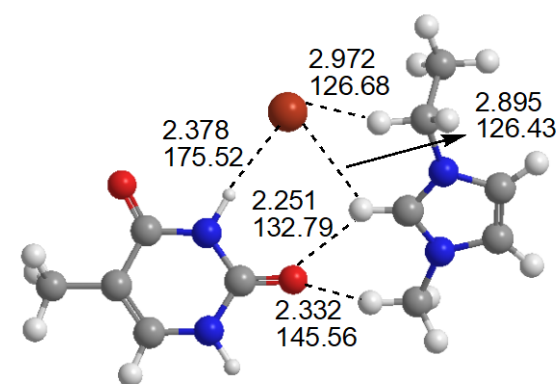

T-[C<sub>2</sub>mim]<sup>+</sup>-Br<sup>-</sup>-10 (2.95)

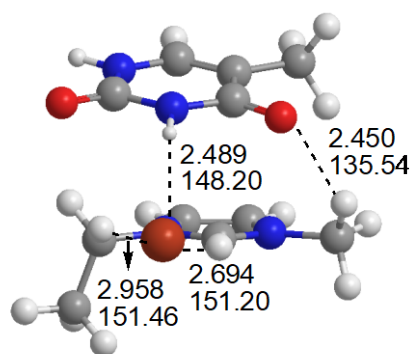T-[C<sub>2</sub>mim]<sup>+</sup>-Br<sup>-</sup>-3 (4.28)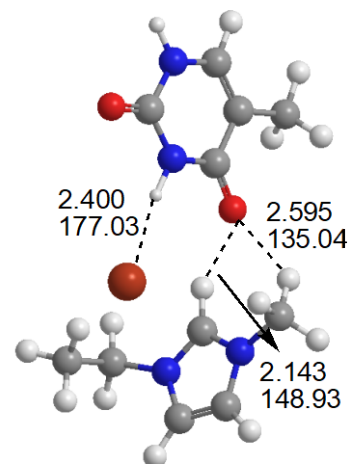T-[C<sub>2</sub>mim]<sup>+</sup>-Br<sup>-</sup>-7 (4.95)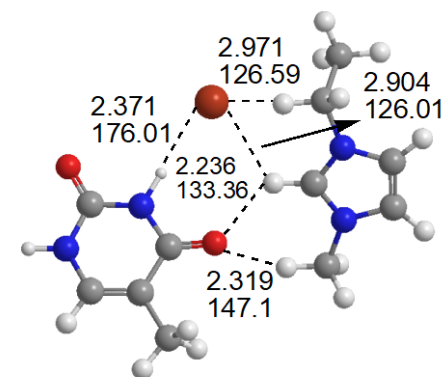T-[C<sub>2</sub>mim]<sup>+</sup>-Br<sup>-</sup>-11 (3.08)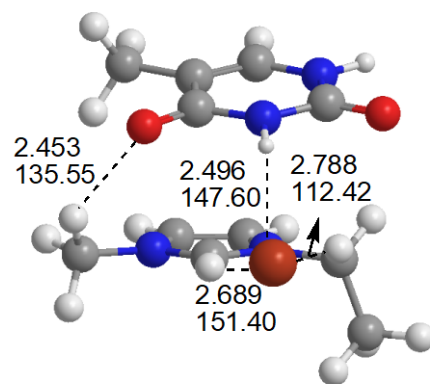T-[C<sub>2</sub>mim]<sup>+</sup>-Br<sup>-</sup>-4 (4.33)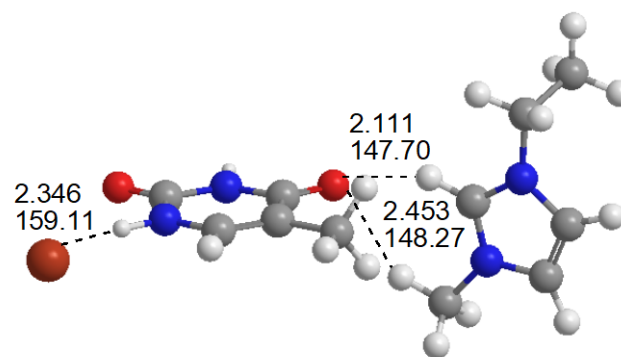T-[C<sub>2</sub>mim]<sup>+</sup>-Br<sup>-</sup>-8 (13.43)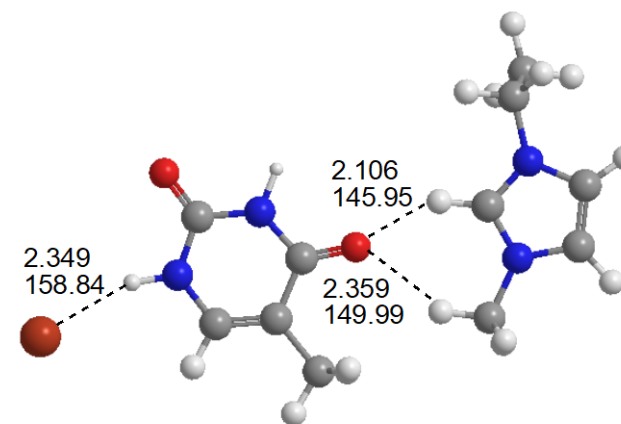T-[C<sub>2</sub>mim]<sup>+</sup>-Br<sup>-</sup>-12 (10.76)

### Stacking (S)

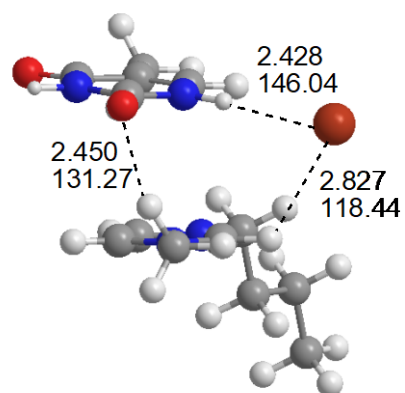

T-[C4mim]<sup>+</sup>-Br<sup>-</sup>-1 (0.00)

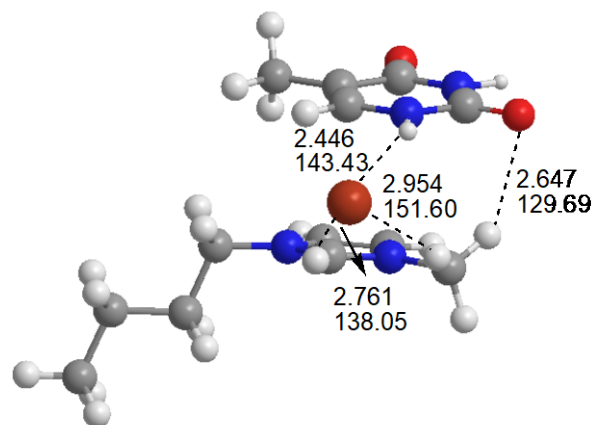

T-[C4mim]<sup>+</sup>-Br<sup>-</sup>-2 (2.27)

### Perpendicular (P)

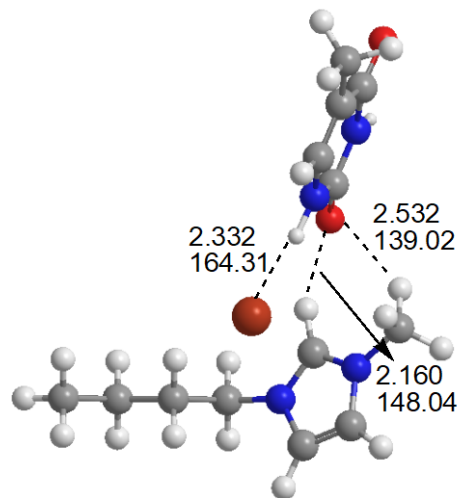

T-[C4mim]<sup>+</sup>-Br<sup>-</sup>-5 (0.00)

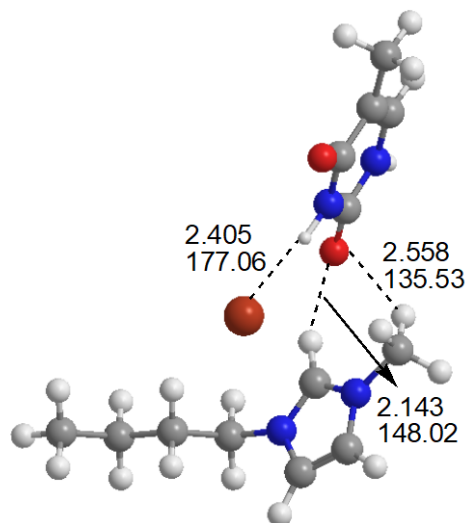

T-[C4mim]<sup>+</sup>-Br<sup>-</sup>-6 (4.21)

### Coplanar (H)

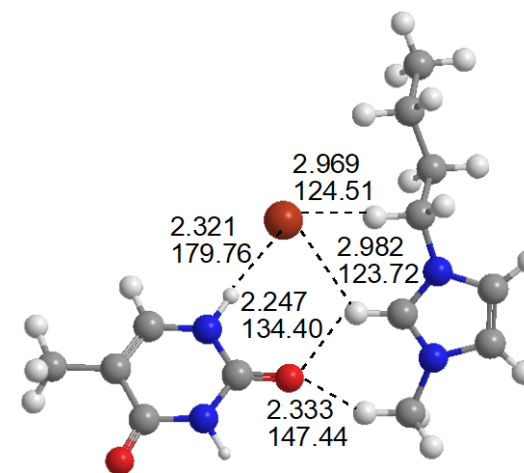

T-[C4mim]<sup>+</sup>-Br<sup>-</sup>-9 (0.00)

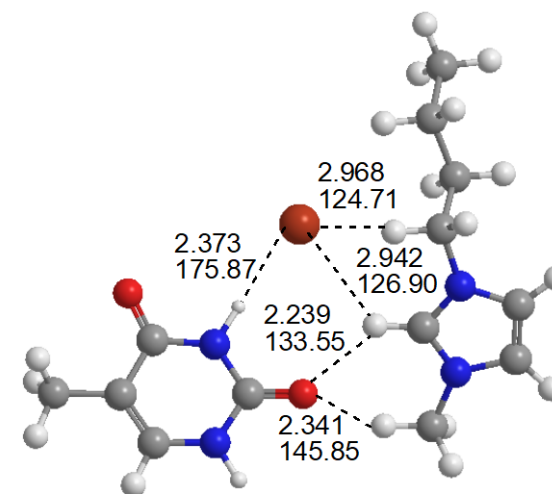

T-[C4mim]<sup>+</sup>-Br<sup>-</sup>-10 (3.23)

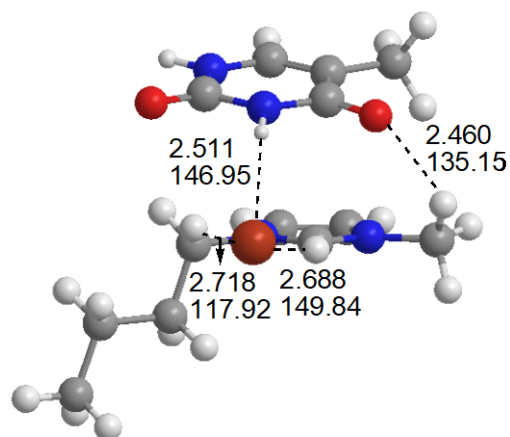T-[C<sub>4</sub>mim]<sup>+</sup>-Br<sup>-</sup>-3 (3.92)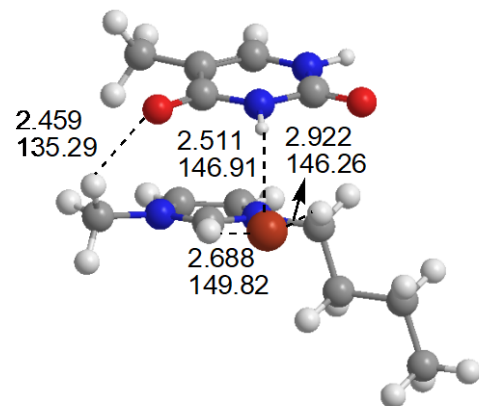T-[C<sub>4</sub>mim]<sup>+</sup>-Br<sup>-</sup>-4 (3.92)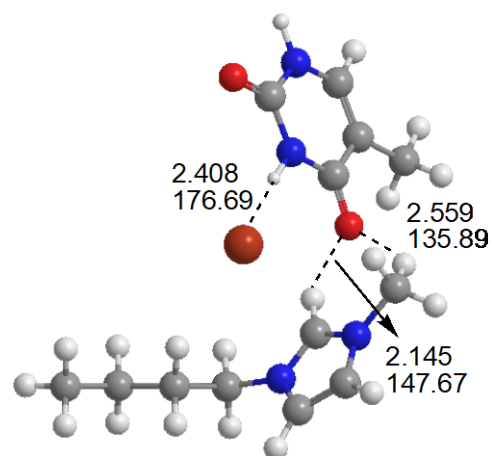T-[C<sub>4</sub>mim]<sup>+</sup>-Br<sup>-</sup>-7 (5.00)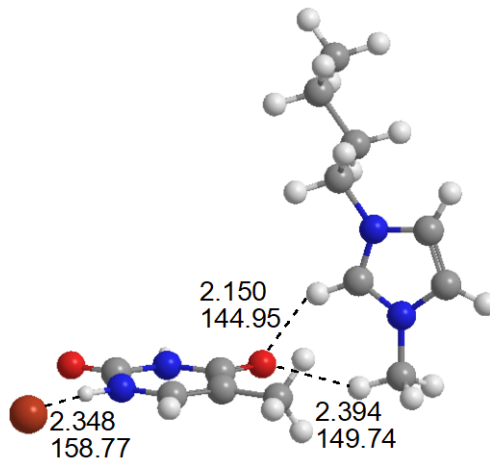T-[C<sub>4</sub>mim]<sup>+</sup>-Br<sup>-</sup>-8 (14.25)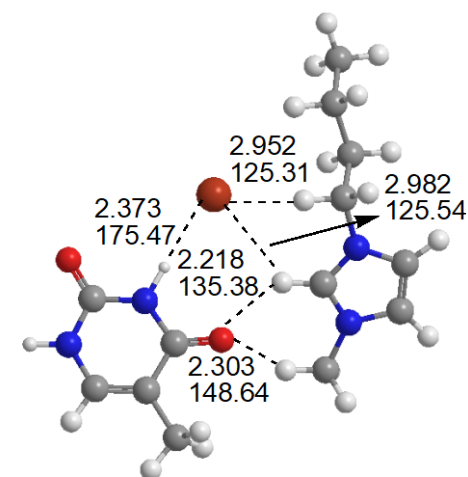T-[C<sub>4</sub>mim]<sup>+</sup>-Br<sup>-</sup>-11 (3.66)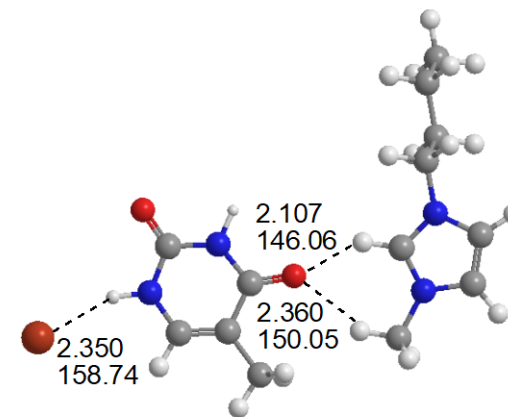T-[C<sub>4</sub>mim]<sup>+</sup>-Br<sup>-</sup>-12 (12.77)

### Stacking (S)

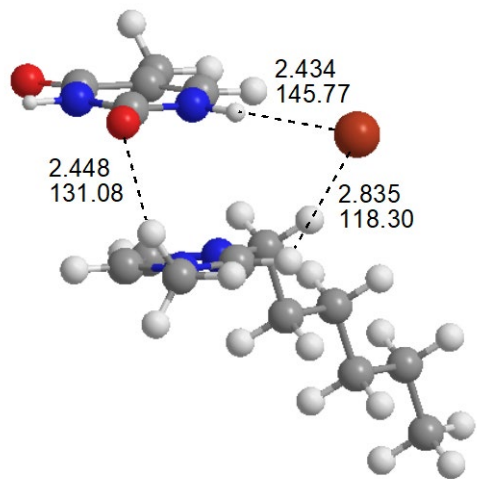

T-[C<sub>6</sub>mim]<sup>+</sup>-Br<sup>-</sup>-1 (0.00)

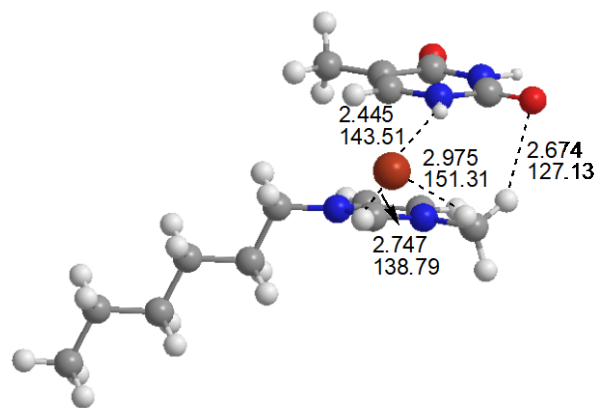

T-[C<sub>6</sub>mim]<sup>+</sup>-Br<sup>-</sup>-2 (2.42)

### Perpendicular (P)

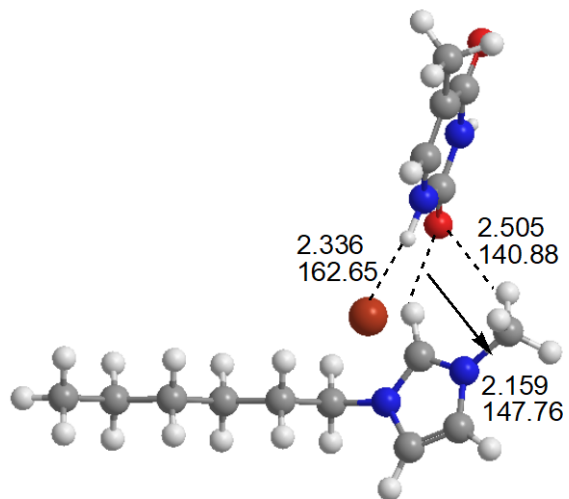

T-[C<sub>6</sub>mim]<sup>+</sup>-Br<sup>-</sup>-5 (0.00)

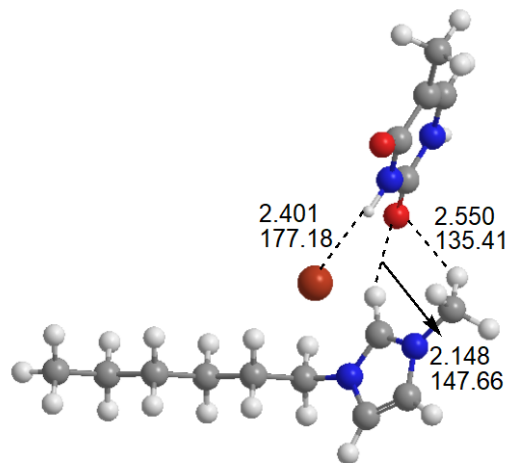

T-[C<sub>6</sub>mim]<sup>+</sup>-Br<sup>-</sup>-6 (4.36)

### Coplanar (H)

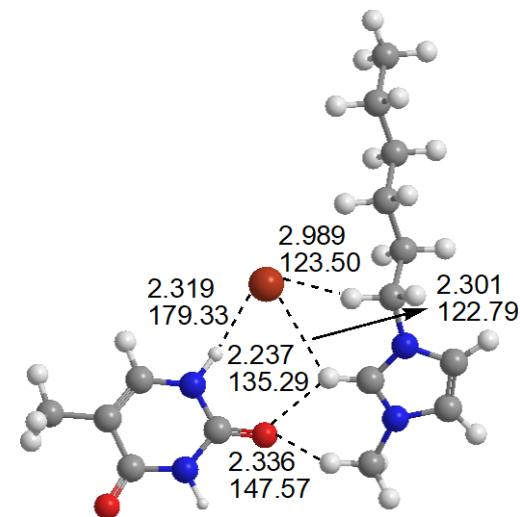

T-[C<sub>6</sub>mim]<sup>+</sup>-Br<sup>-</sup>-9 (0.00)

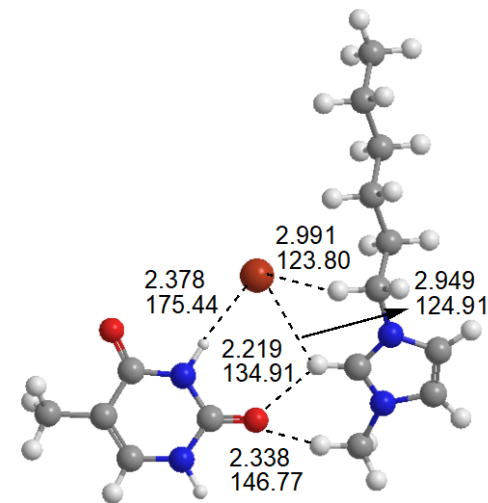

T-[C<sub>6</sub>mim]<sup>+</sup>-Br<sup>-</sup>-10 (2.81)



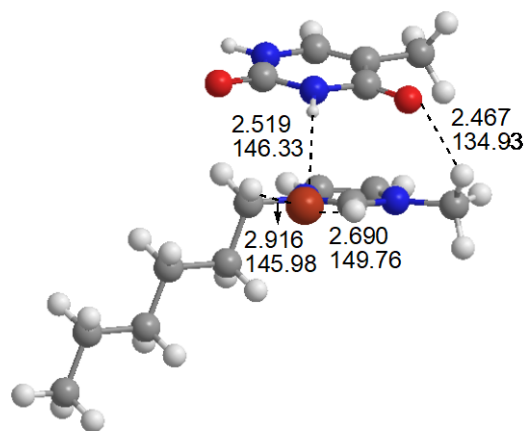T-[C<sub>6</sub>mim]<sup>+</sup>-Br<sup>-</sup>-3 (4.07)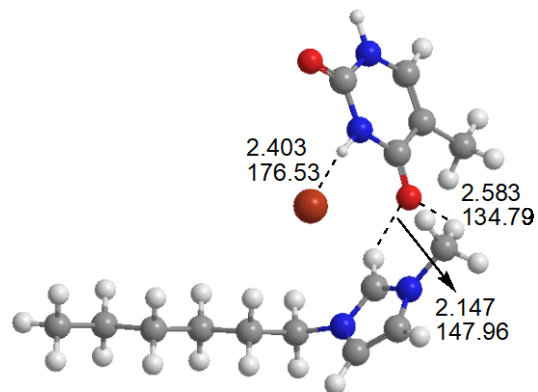T-[C<sub>6</sub>mim]<sup>+</sup>-Br<sup>-</sup>-7 (4.86)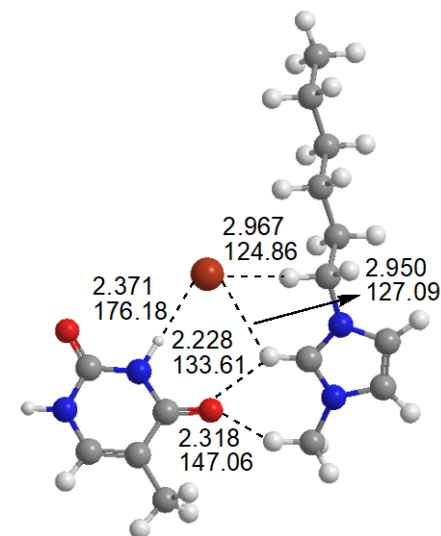T-[C<sub>6</sub>mim]<sup>+</sup>-Br<sup>-</sup>-11 (3.52)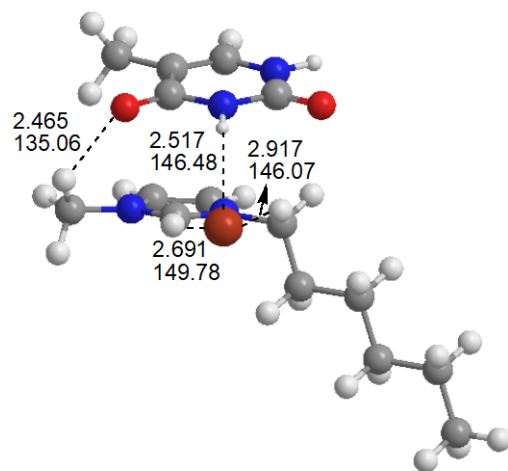T-[C<sub>6</sub>mim]<sup>+</sup>-Br<sup>-</sup>-4 (4.08)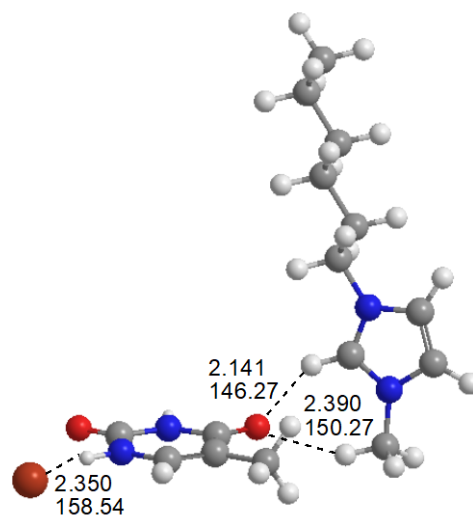T-[C<sub>6</sub>mim]<sup>+</sup>-Br<sup>-</sup>-8 (14.20)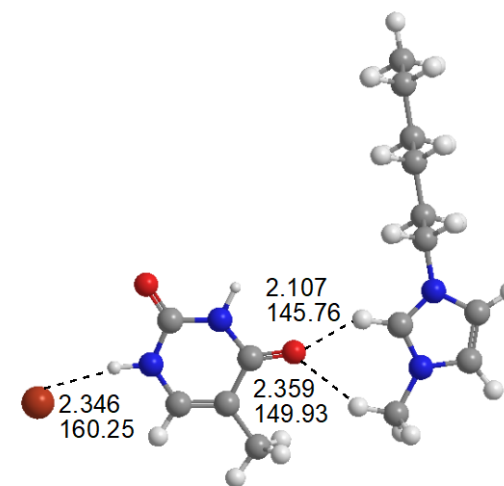T-[C<sub>6</sub>mim]<sup>+</sup>-Br<sup>-</sup>-12 (12.58)

### Stacking (S)

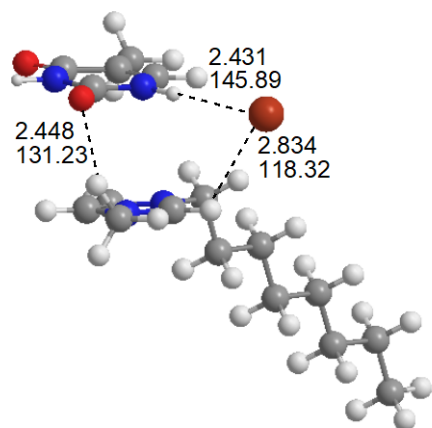

T-[C<sub>8</sub>mim]<sup>+</sup>-Br<sup>-</sup>-1 (0.00)

### Perpendicular (P)

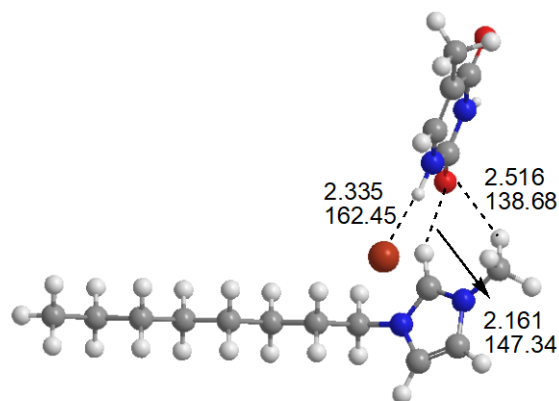

T-[C<sub>8</sub>mim]<sup>+</sup>-Br<sup>-</sup>-5 (0.00)

### Coplanar (H)

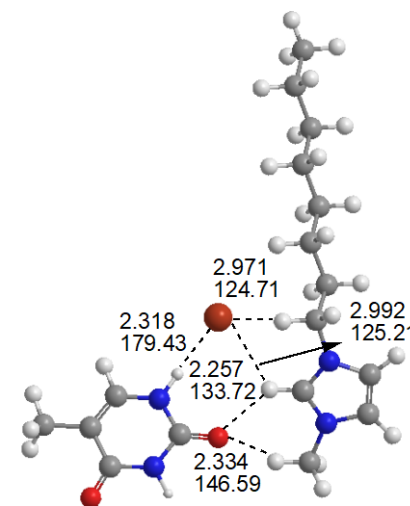

T-[C<sub>8</sub>mim]<sup>+</sup>-Br<sup>-</sup>-9 (0.00)

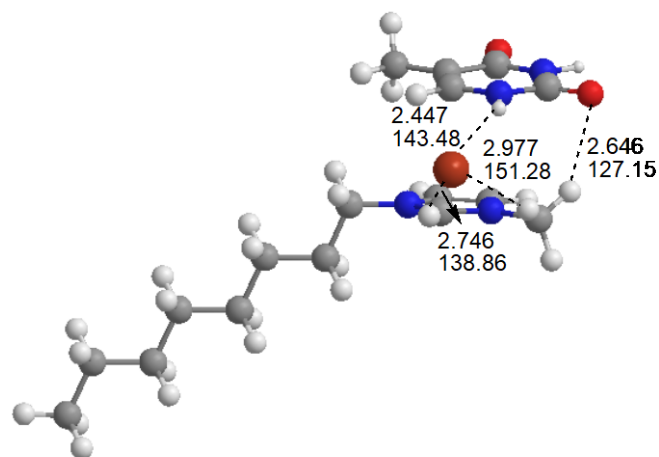

T-[C<sub>8</sub>mim]<sup>+</sup>-Br<sup>-</sup>-2 (2.33)

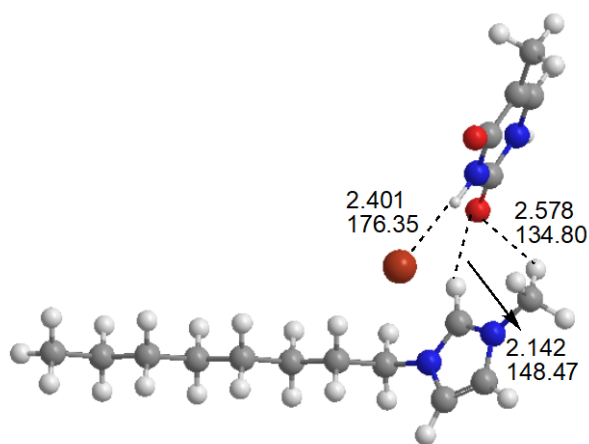

T-[C<sub>8</sub>mim]<sup>+</sup>-Br<sup>-</sup>-6 (4.20)

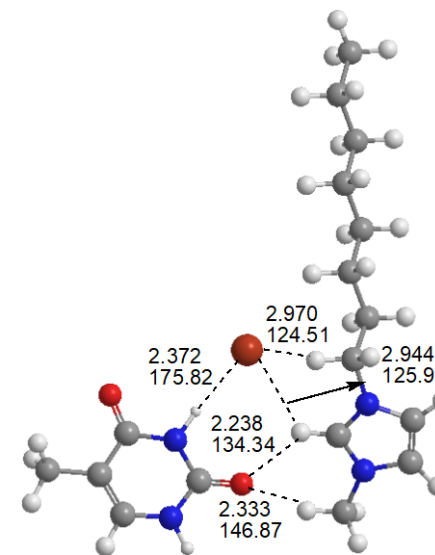

T-[C<sub>8</sub>mim]<sup>+</sup>-Br<sup>-</sup>-10 (3.81)

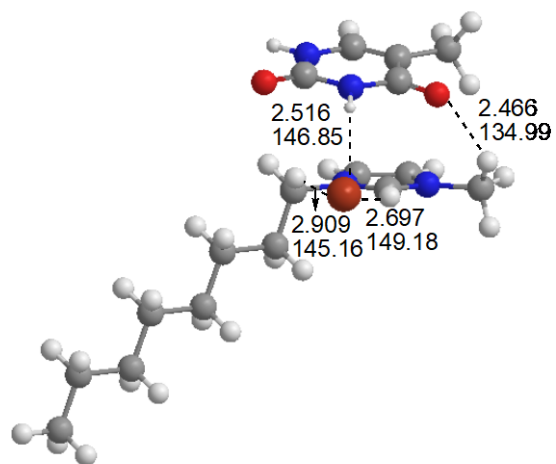T-[C<sub>8</sub>mim]<sup>+</sup>-Br<sup>-</sup>-3 (4.20)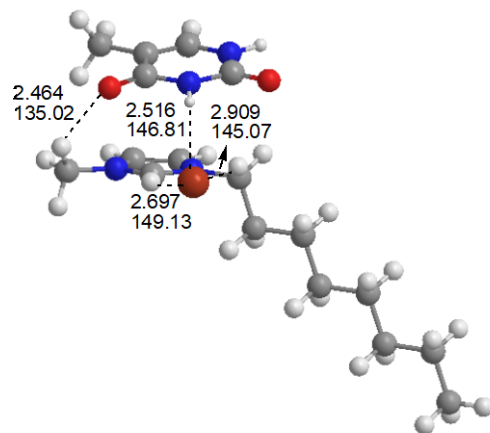T-[C<sub>8</sub>mim]<sup>+</sup>-Br<sup>-</sup>-4 (4.26)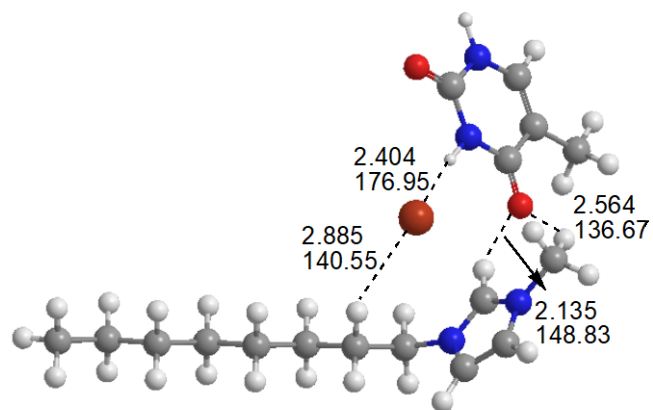T-[C<sub>8</sub>mim]<sup>+</sup>-Br<sup>-</sup>-7 (5.04)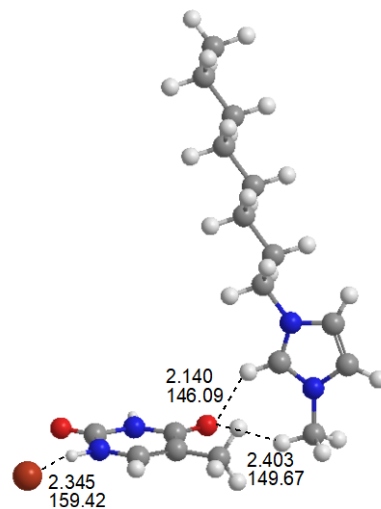T-[C<sub>8</sub>mim]<sup>+</sup>-Br<sup>-</sup>-8 (14.02)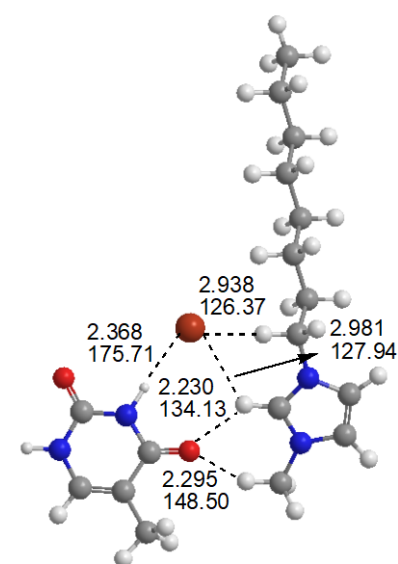T-[C<sub>8</sub>mim]<sup>+</sup>-Br<sup>-</sup>-11 (4.10)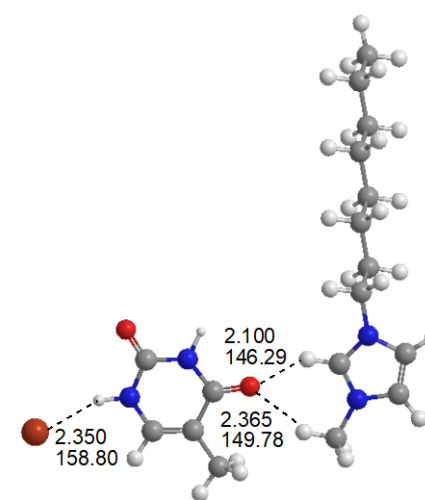T-[C<sub>8</sub>mim]<sup>+</sup>-Br<sup>-</sup>-12 (13.76)

### Stacking (S)

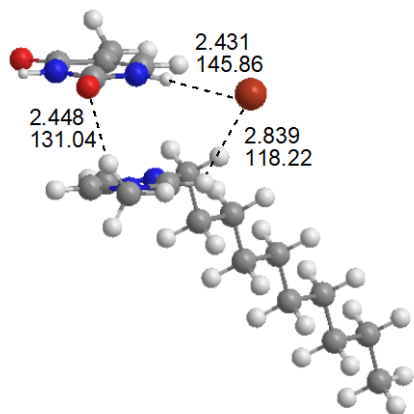

T-[C<sub>10</sub>mim]<sup>+</sup>-Br<sup>-</sup>-1 (0.00)

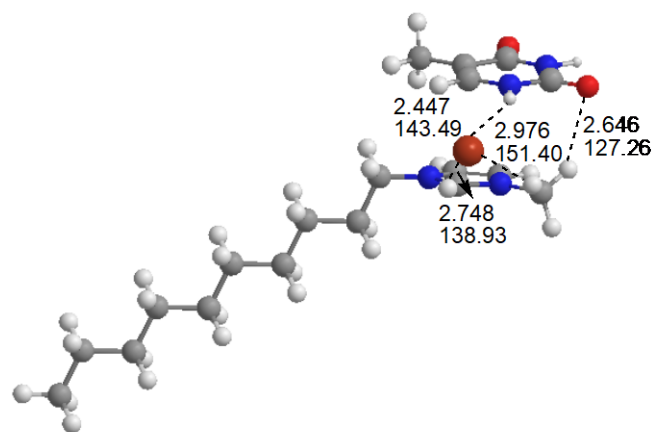

T-[C<sub>10</sub>mim]<sup>+</sup>-Br<sup>-</sup>-2 (3.07)

### Perpendicular (P)

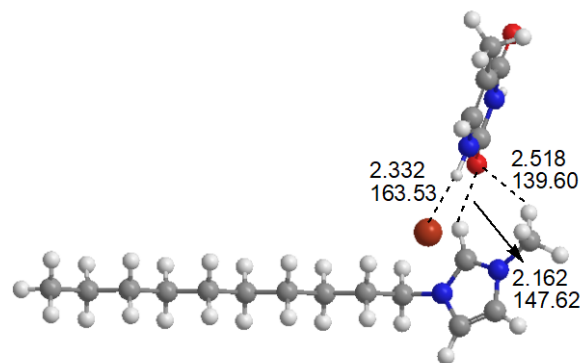

T-[C<sub>10</sub>mim]<sup>+</sup>-Br<sup>-</sup>-5 (0.00)

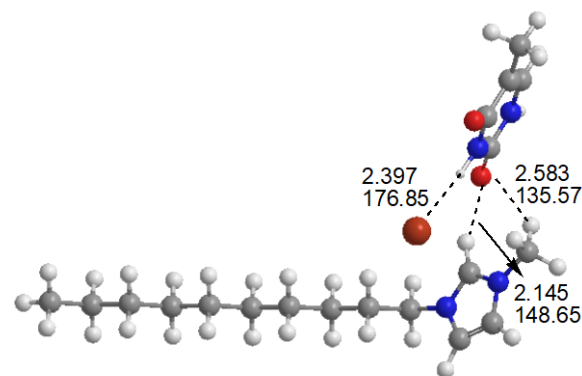

T-[C<sub>10</sub>mim]<sup>+</sup>-Br<sup>-</sup>-6 (4.31)

### Coplanar (H)

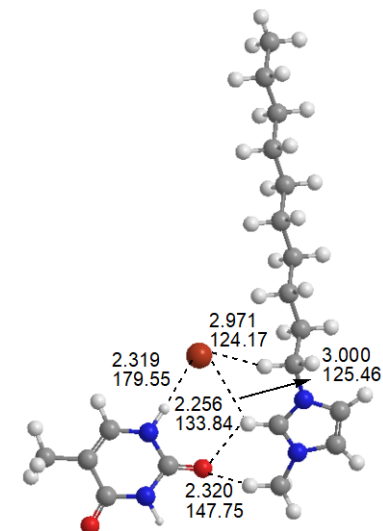

T-[C<sub>10</sub>mim]<sup>+</sup>-Br<sup>-</sup>-9 (0.00)

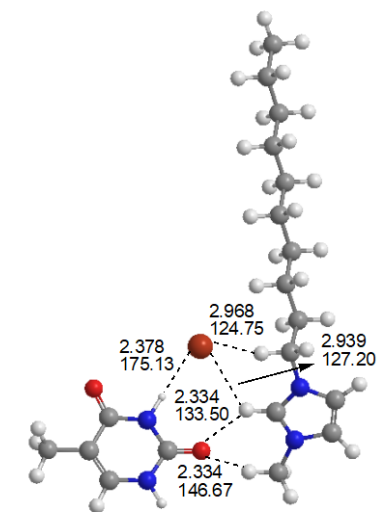

T-[C<sub>10</sub>mim]<sup>+</sup>-Br<sup>-</sup>-10 (3.15)

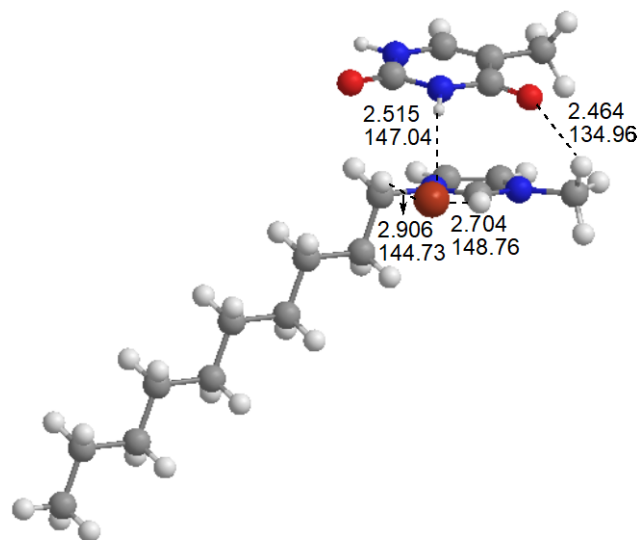T-[C<sub>10</sub>mim]<sup>+</sup>-Br<sup>-</sup>-3 (4.09)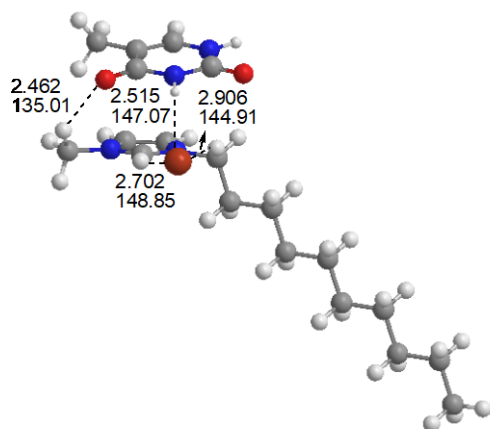T-[C<sub>10</sub>mim]<sup>+</sup>-Br<sup>-</sup>-4 (4.27)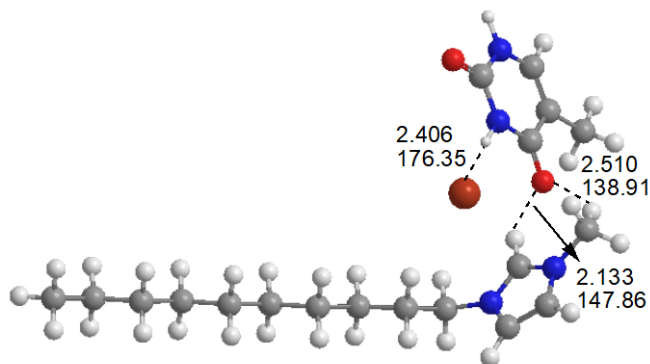T-[C<sub>10</sub>mim]<sup>+</sup>-Br<sup>-</sup>-7 (4.91)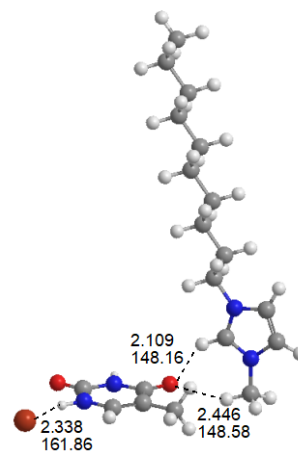T-[C<sub>10</sub>mim]<sup>+</sup>-Br<sup>-</sup>-8 (12.80)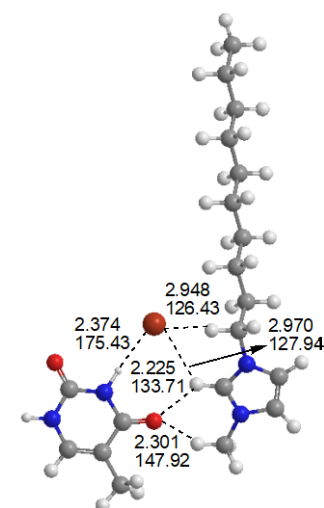T-[C<sub>10</sub>mim]<sup>+</sup>-Br<sup>-</sup>-11 (3.67)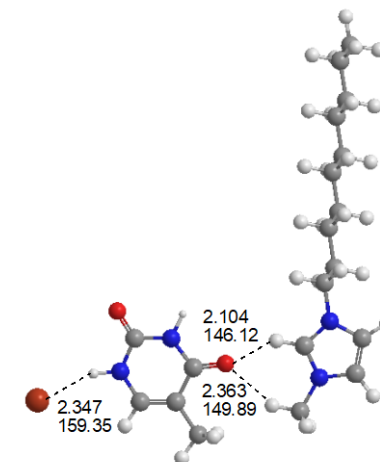T-[C<sub>10</sub>mim]<sup>+</sup>-Br<sup>-</sup>-12 (13.12)

**Figure S4.** 12 of the di-ionic structures of thymine with five imidazolium ILs (T-[C<sub>n</sub>mim]<sup>+</sup>-Br<sup>-</sup>, n = 2, 4, 6, 8, 10) calculated at the M06-2X/6-311++G(2d, p)/PCM/water level of theory. The ZPVE-corrected stability decreases from top to bottom for each configuration (in kJ/mol).

**Stacking (S)**

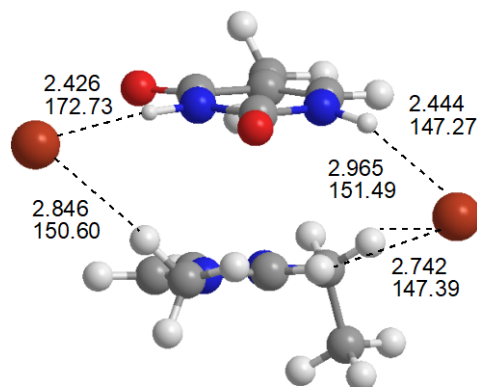

T-[C<sub>2</sub>mim]<sup>+</sup>-2Br<sup>-</sup>-1 (0.00)

**Perpendicular (P)**

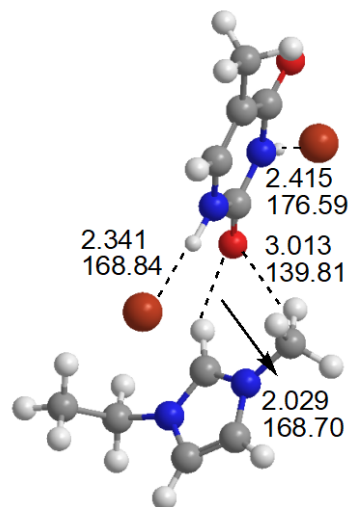

T-[C<sub>2</sub>mim]<sup>+</sup>-2Br<sup>-</sup>-2 (15.75)

**Coplanar (H)**

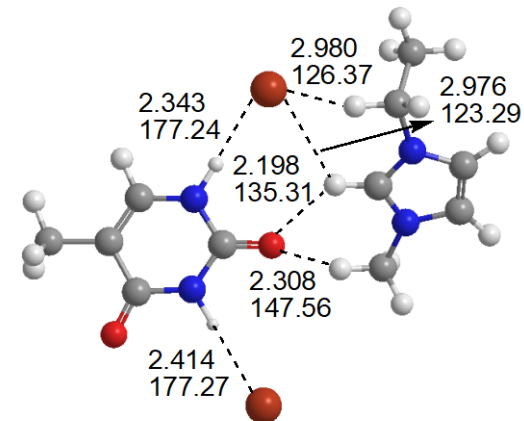

T-[C<sub>2</sub>mim]<sup>+</sup>-2Br<sup>-</sup>-3 (18.95)

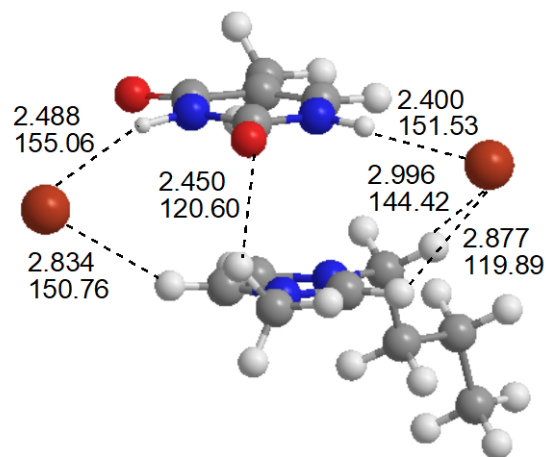

T-[C<sub>4</sub>mim]<sup>+</sup>-2Br<sup>-</sup>-1 (0.00)

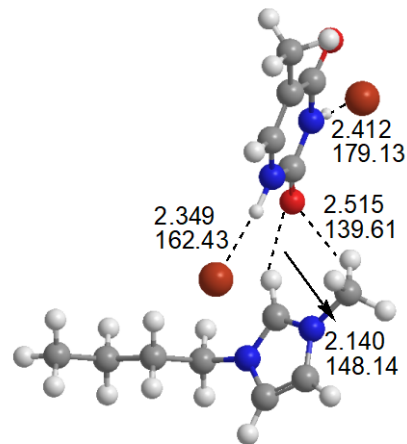

T-[C<sub>4</sub>mim]<sup>+</sup>-2Br<sup>-</sup>-2 (11.77)

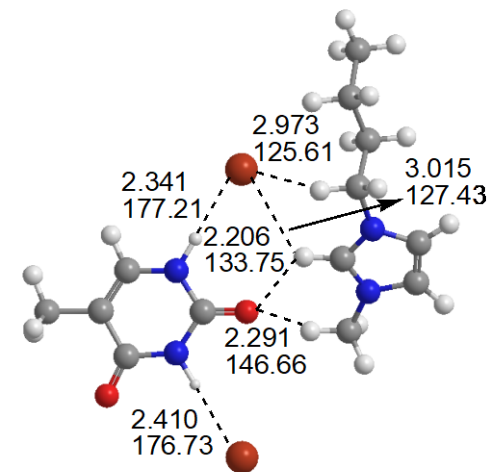

T-[C<sub>4</sub>mim]<sup>+</sup>-2Br<sup>-</sup>-3 (13.14)

Continued

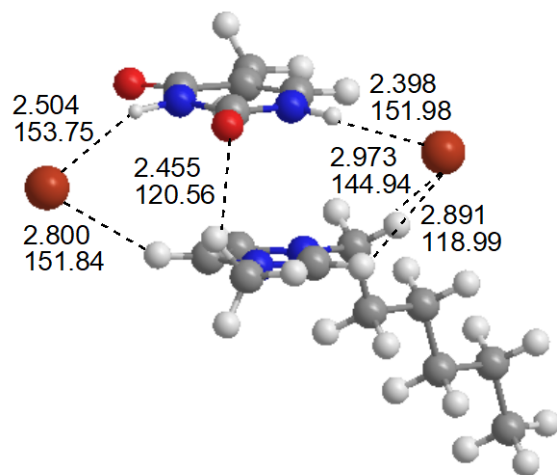

*Continued*

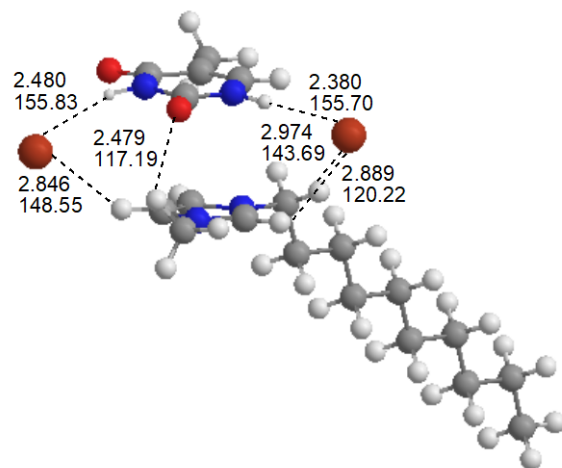

T-[C<sub>10</sub>mim]<sup>+</sup>-2Br<sup>-</sup>-1 (0.00)

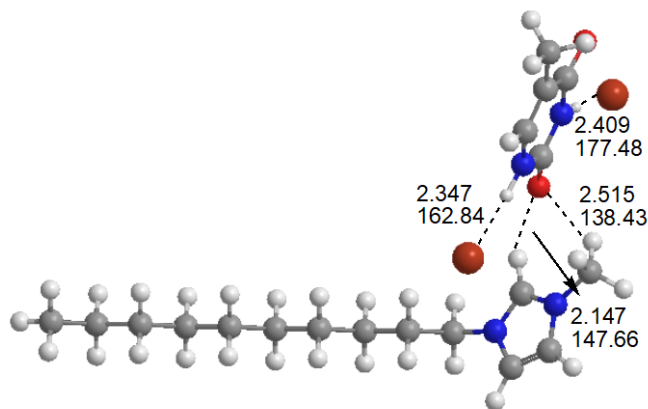

T-[C<sub>10</sub>mim]<sup>+</sup>-2Br<sup>-</sup>-2 (12.53)

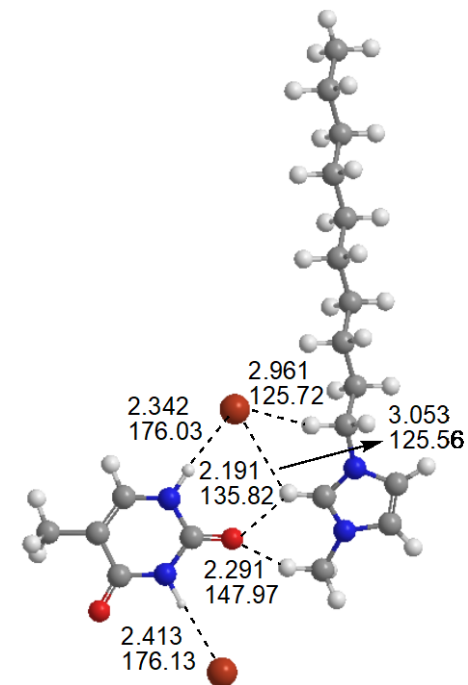

T-[C<sub>10</sub>mim]<sup>+</sup>-2Br<sup>-</sup>-3 (12.62)

**Figure S5.** 3 of the tri-ionic structures of thymine with five imidazolium ILs (T-[C<sub>n</sub>mim]<sup>+</sup>-2Br<sup>-</sup>, n = 2, 4, 6, 8, 10) based on the stacking, perpendicular, and coplanar configurations and calculated at the M06-2X/6-311++G(2d, p)/PCM/water level of theory. The ZPVE-corrected stability decreases from left to right (in kJ/mol).



**Stacking (S)**

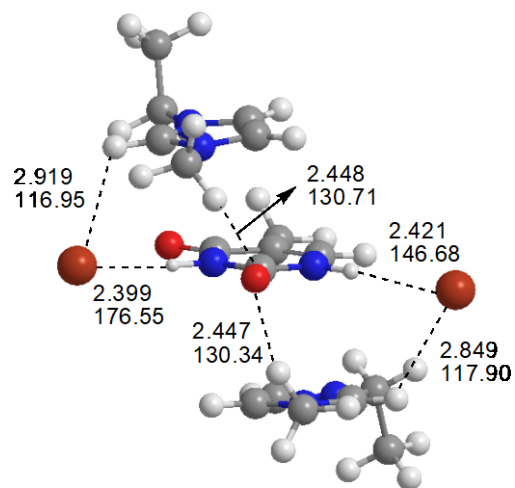

T-2[C<sub>2</sub>mim]<sup>+</sup>-2Br<sup>-</sup>-1 (0.00)

**Perpendicular (P)**

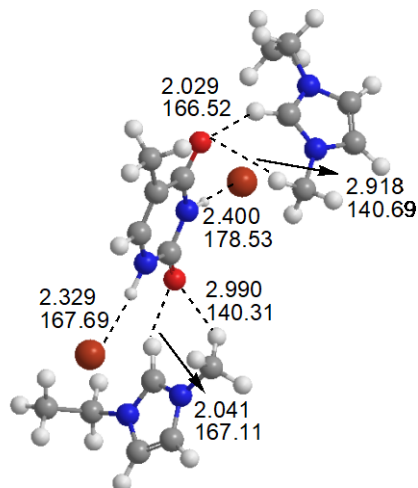

T-2[C<sub>2</sub>mim]<sup>+</sup>-2Br<sup>-</sup>-2 (18.69)

**Coplanar (H)**

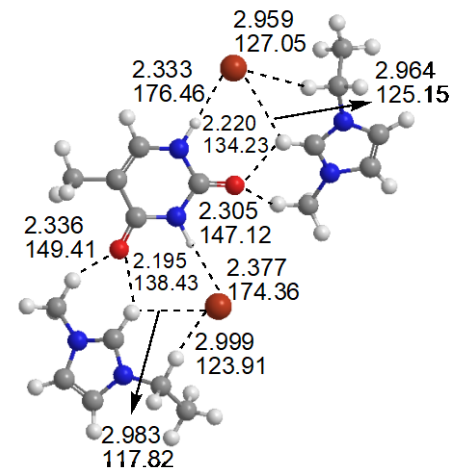

T-2[C<sub>2</sub>mim]<sup>+</sup>-2Br<sup>-</sup>-3 (25.38)

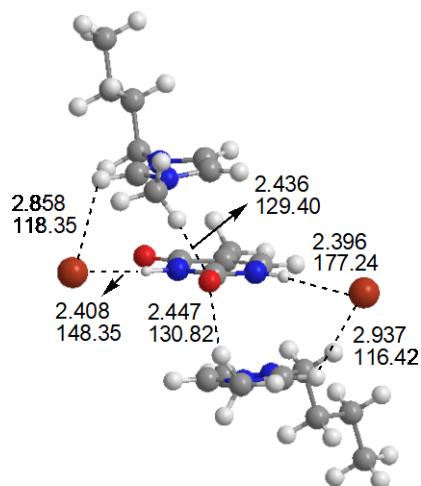

T-2[C<sub>4</sub>mim]<sup>+</sup>-2Br<sup>-</sup>-1 (0.00)

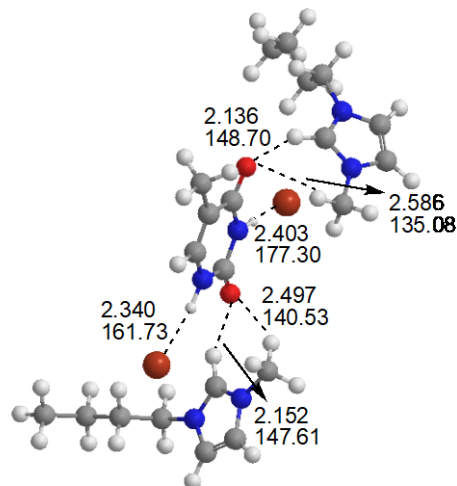

T-2[C<sub>4</sub>mim]<sup>+</sup>-2Br<sup>-</sup>-2 (19.17)

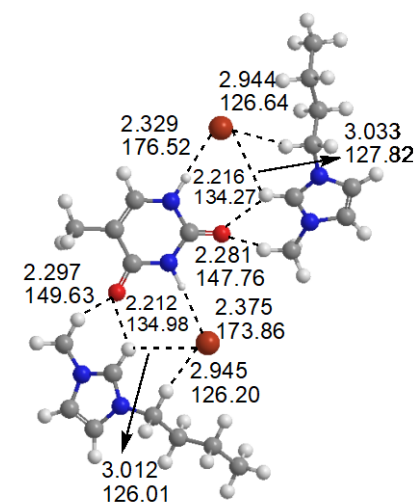

T-2[C<sub>4</sub>mim]<sup>+</sup>-2Br<sup>-</sup>-3 (21.95)

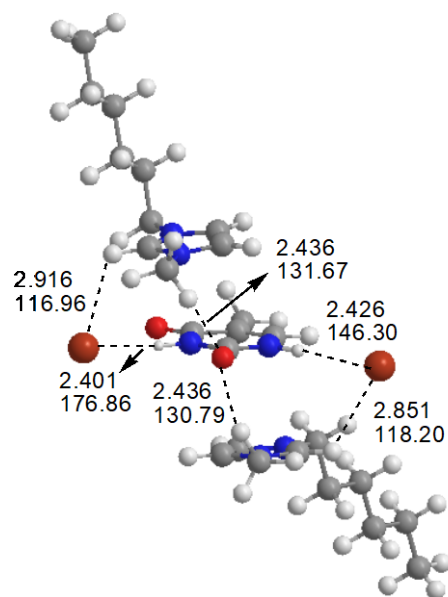T-2[C<sub>6</sub>mim]<sup>+</sup>-2Br<sup>-</sup>-1 (0.00)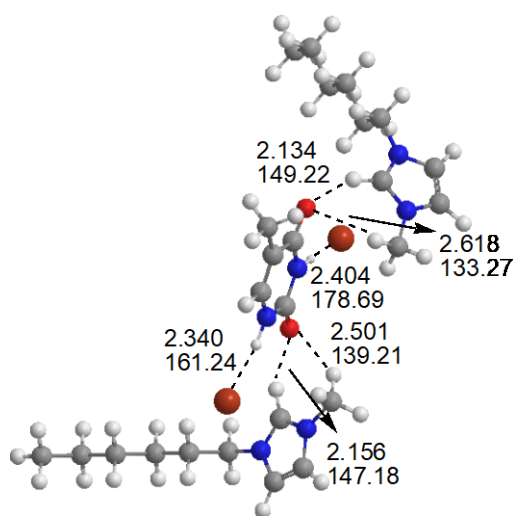T-2[C<sub>6</sub>mim]<sup>+</sup>-2Br<sup>-</sup>-2 (19.13)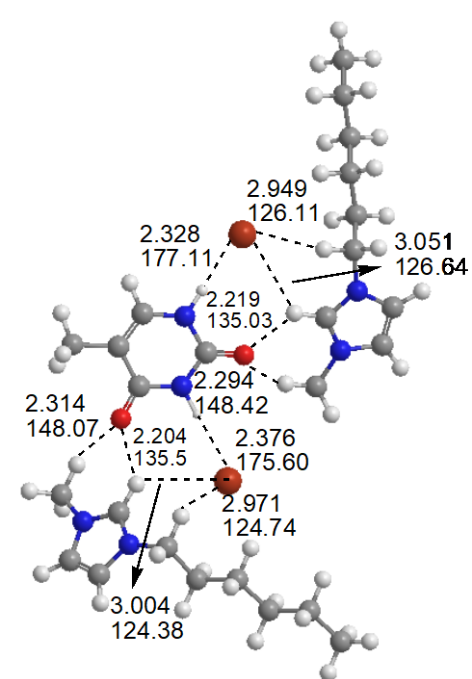T-2[C<sub>6</sub>mim]<sup>+</sup>-2Br<sup>-</sup>-3 (21.04)

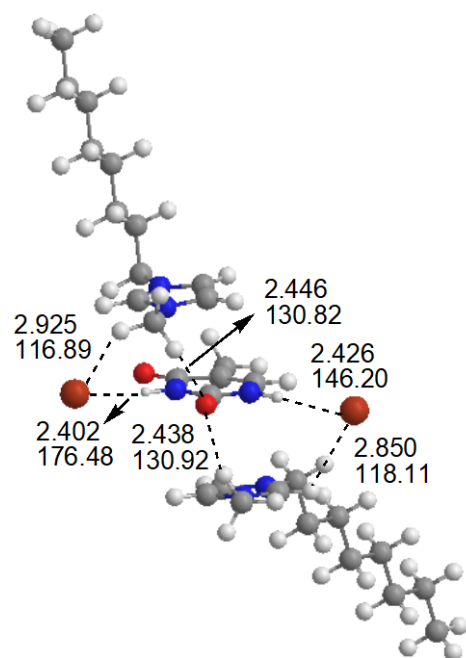T-2[C<sub>8</sub>mim]<sup>+</sup>-2Br<sup>-</sup>-1 (0.00)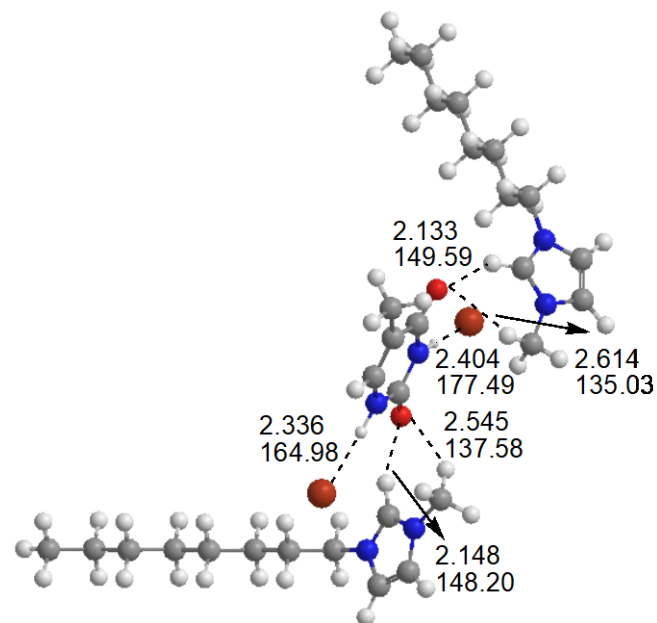T-2[C<sub>8</sub>mim]<sup>+</sup>-2Br<sup>-</sup>-2 (20.20)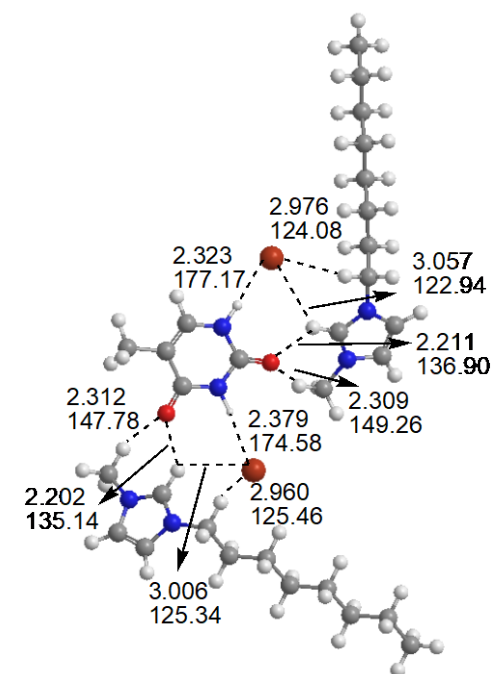T-2[C<sub>8</sub>mim]<sup>+</sup>-2Br<sup>-</sup>-3 (21.60)

Continued

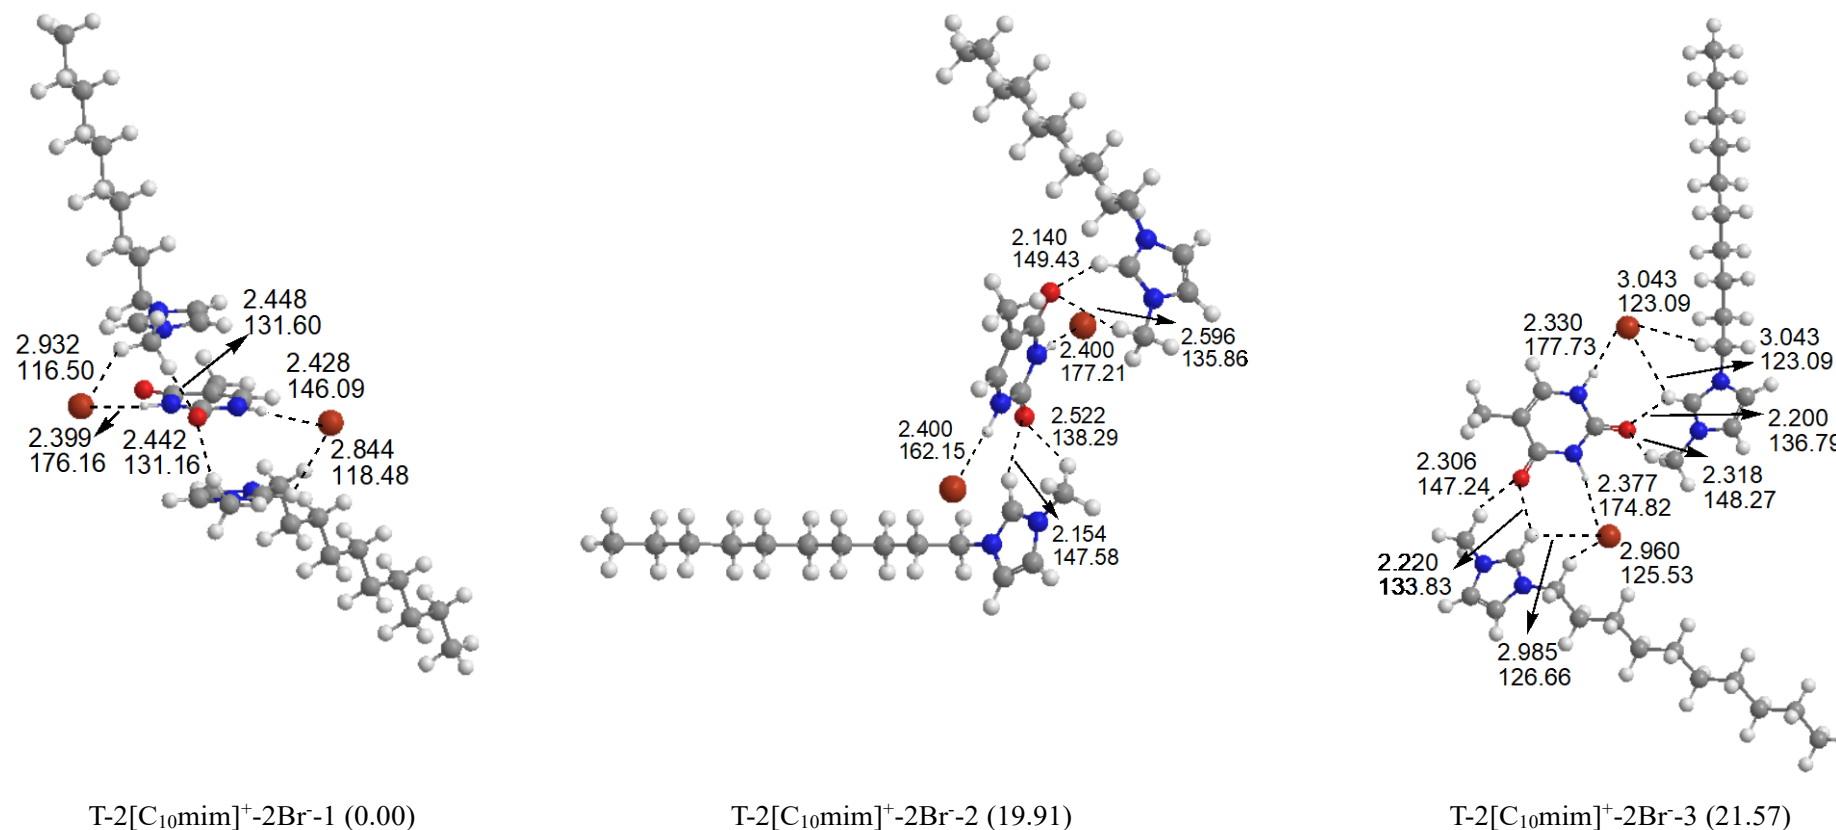

T-2[C<sub>10</sub>mim]<sup>+</sup>-2Br<sup>-</sup>-1 (0.00)

T-2[C<sub>10</sub>mim]<sup>+</sup>-2Br<sup>-</sup>-2 (19.91)

T-2[C<sub>10</sub>mim]<sup>+</sup>-2Br<sup>-</sup>-3 (21.57)

**Figure S6.** 3 of the tetra-ionic structures of thymine with five imidazolium ILs (T-2[C<sub>n</sub>mim]<sup>+</sup>-2Br<sup>-</sup>, n = 2, 4, 6, 8, 10) based on the stacking, perpendicular, and coplanar configurations and calculated at the M06-2X/6-311++G(2d, p)/PCM/water level of theory. The ZPVE-corrected stability decreases from left to right (in kJ/mol).

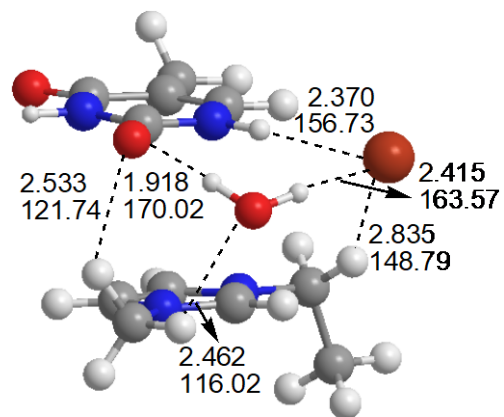

T-1H<sub>2</sub>O-[C<sub>2</sub>mim]<sup>+</sup>-Br<sup>-</sup>-1 (0.00)

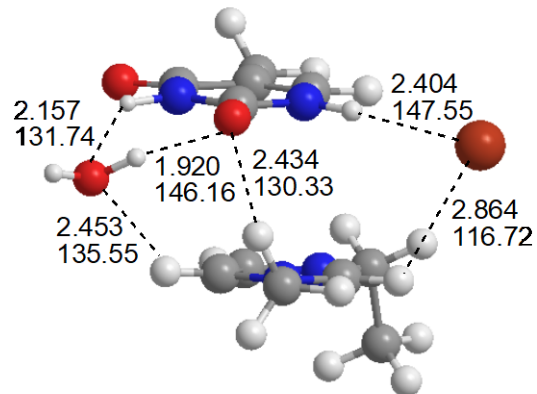

T-1H<sub>2</sub>O-[C<sub>2</sub>mim]<sup>+</sup>-Br<sup>-</sup>-2 (5.59)

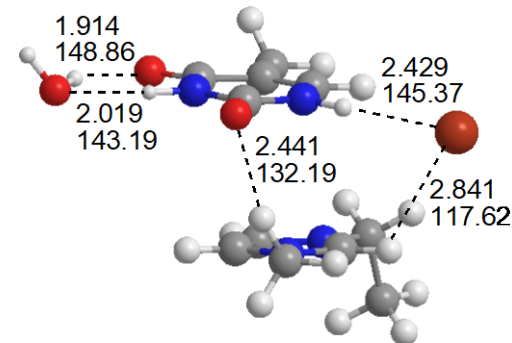

T-1H<sub>2</sub>O-[C<sub>2</sub>mim]<sup>+</sup>-Br<sup>-</sup>-3 (7.05)

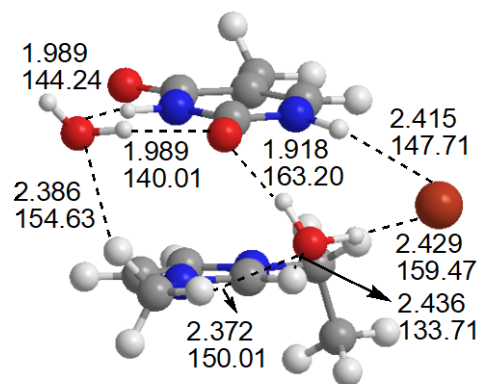

T-2H<sub>2</sub>O-[C<sub>2</sub>mim]<sup>+</sup>-Br<sup>-</sup>-1 (0.00)

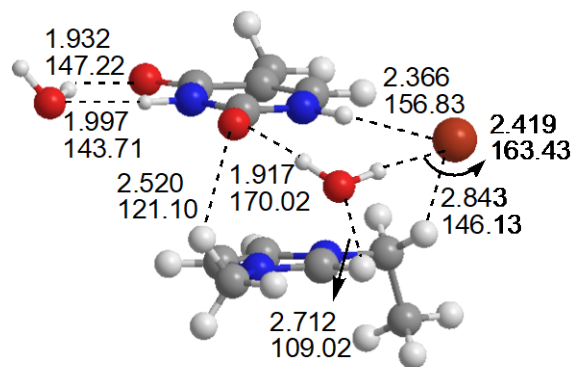

T-2H<sub>2</sub>O-[C<sub>2</sub>mim]<sup>+</sup>-Br<sup>-</sup>-2 (1.67)

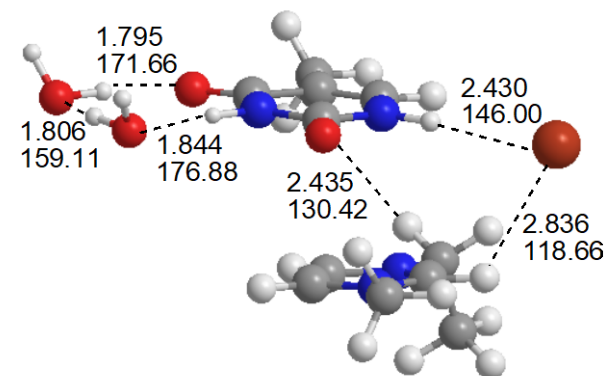

T-2H<sub>2</sub>O-[C<sub>2</sub>mim]<sup>+</sup>-Br<sup>-</sup>-3 (3.85)

Continued

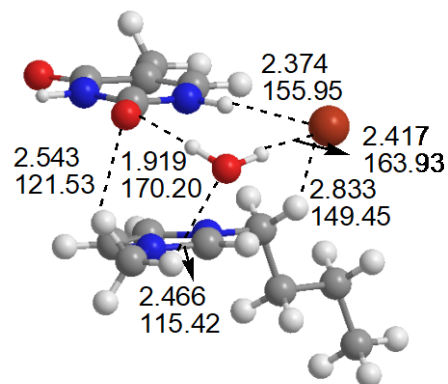

T-1H<sub>2</sub>O-[C<sub>4</sub>mim]<sup>+</sup>-Br-1 (0.00)

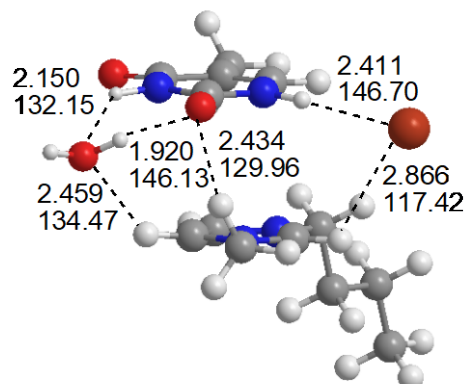

T-1H<sub>2</sub>O-[C<sub>4</sub>mim]<sup>+</sup>-Br-2 (6.87)

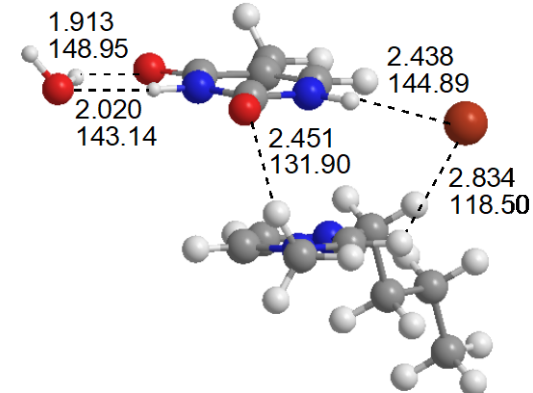

T-1H<sub>2</sub>O-[C<sub>4</sub>mim]<sup>+</sup>-Br-3 (7.91)

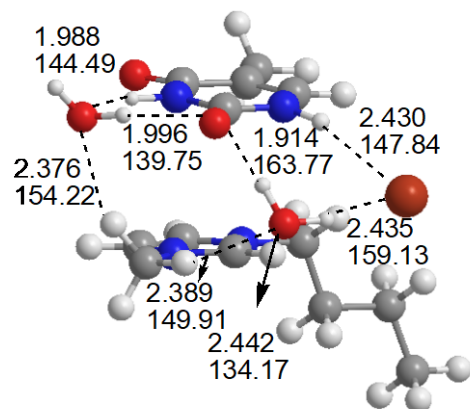

T-2H<sub>2</sub>O-[C<sub>4</sub>mim]<sup>+</sup>-Br-1 (0.00)

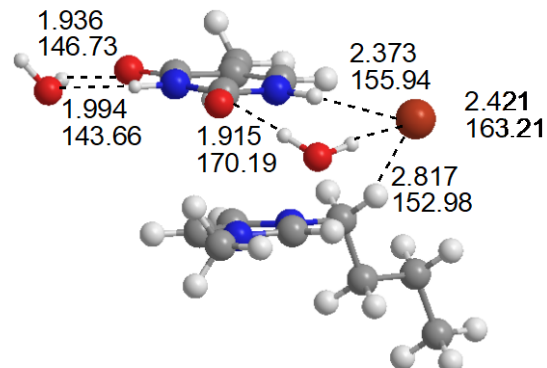

T-2H<sub>2</sub>O-[C<sub>4</sub>mim]<sup>+</sup>-Br-2 (2.21)

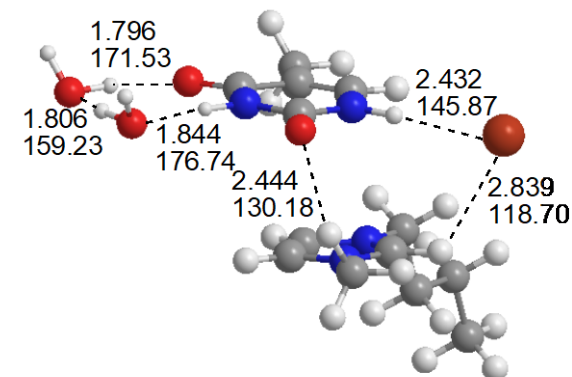

T-2H<sub>2</sub>O-[C<sub>4</sub>mim]<sup>+</sup>-Br-3 (4.88)

Continued

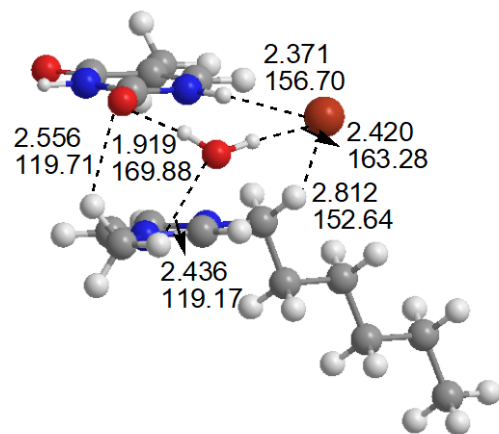

T-1H<sub>2</sub>O-[C<sub>6</sub>mim]<sup>+</sup>-Br<sup>-</sup>-1 (0.00)

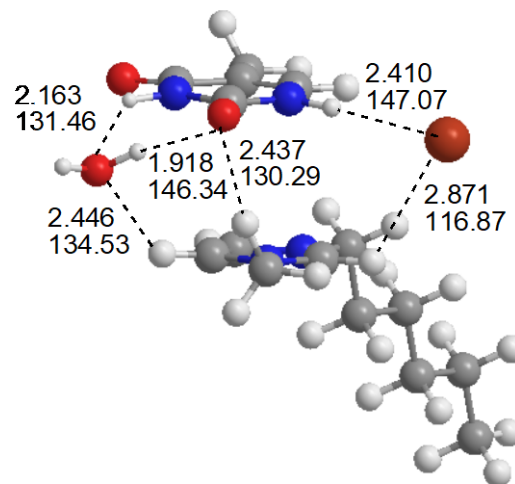

T-1H<sub>2</sub>O-[C<sub>6</sub>mim]<sup>+</sup>-Br<sup>-</sup>-2 (7.16)

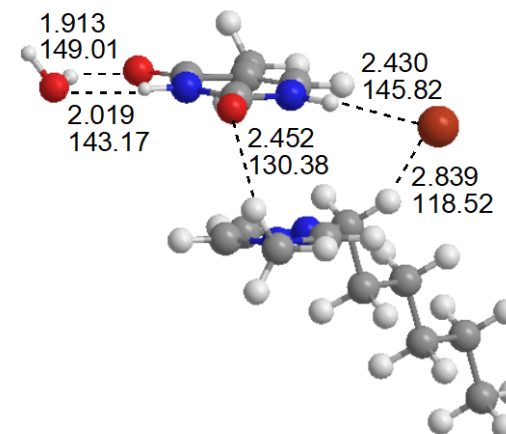

T-1H<sub>2</sub>O-[C<sub>6</sub>mim]<sup>+</sup>-Br<sup>-</sup>-3 (8.66)

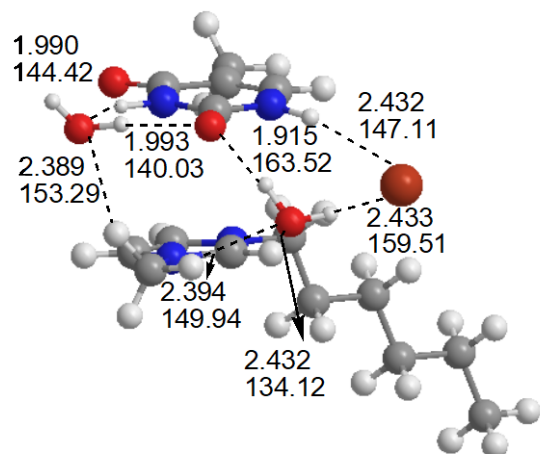

T-2H<sub>2</sub>O-[C<sub>6</sub>mim]<sup>+</sup>-Br<sup>-</sup>-1 (0.00)

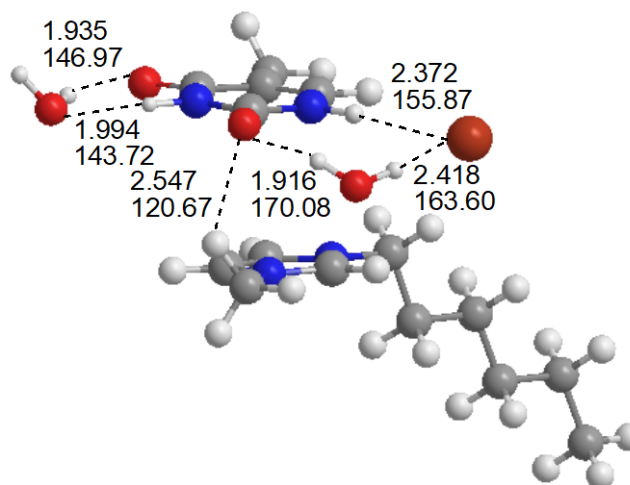

T-2H<sub>2</sub>O-[C<sub>6</sub>mim]<sup>+</sup>-Br<sup>-</sup>-2 (2.25)

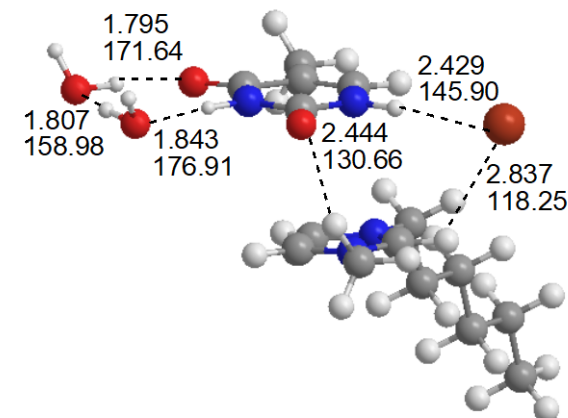

T-2H<sub>2</sub>O-[C<sub>6</sub>mim]<sup>+</sup>-Br<sup>-</sup>-3 (5.77)



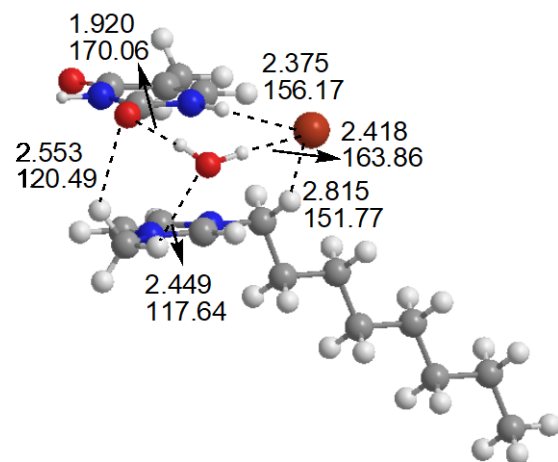T-1H<sub>2</sub>O-[C<sub>8</sub>mim]<sup>+</sup>-Br<sup>-</sup>-1 (0.00)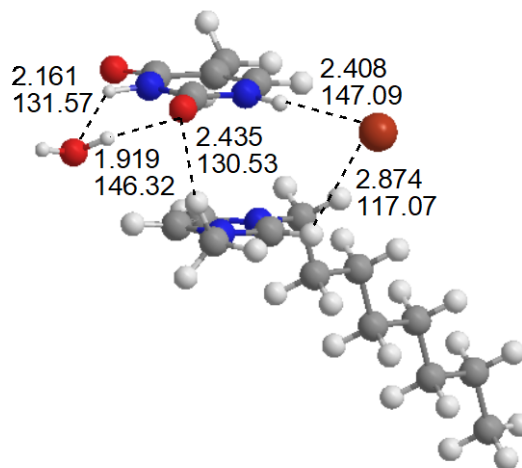T-1H<sub>2</sub>O-[C<sub>8</sub>mim]<sup>+</sup>-Br<sup>-</sup>-2 (6.89)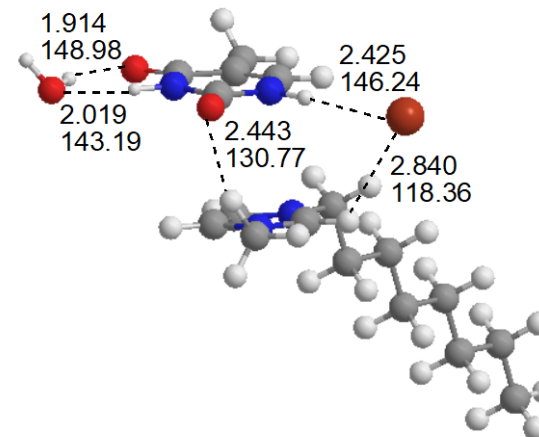T-1H<sub>2</sub>O-[C<sub>8</sub>mim]<sup>+</sup>-Br<sup>-</sup>-3 (8.29)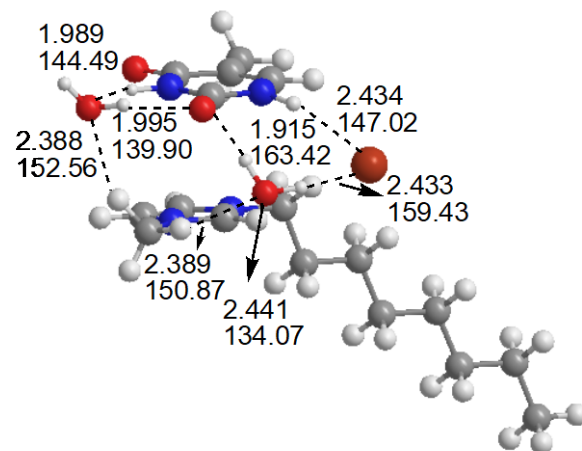T-2H<sub>2</sub>O-[C<sub>8</sub>mim]<sup>+</sup>-Br<sup>-</sup>-1 (0.00)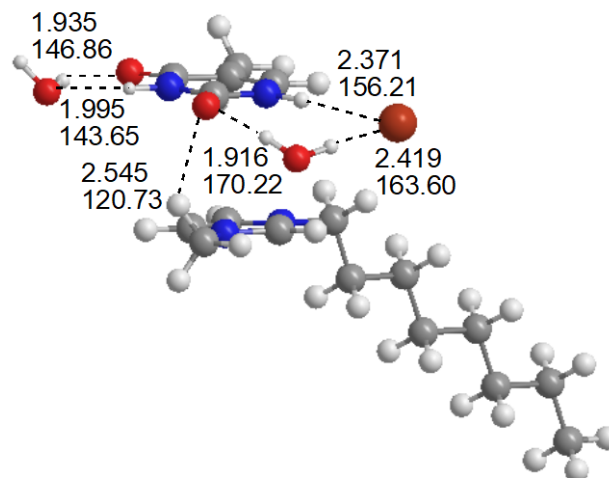T-2H<sub>2</sub>O-[C<sub>8</sub>mim]<sup>+</sup>-Br<sup>-</sup>-2 (3.30)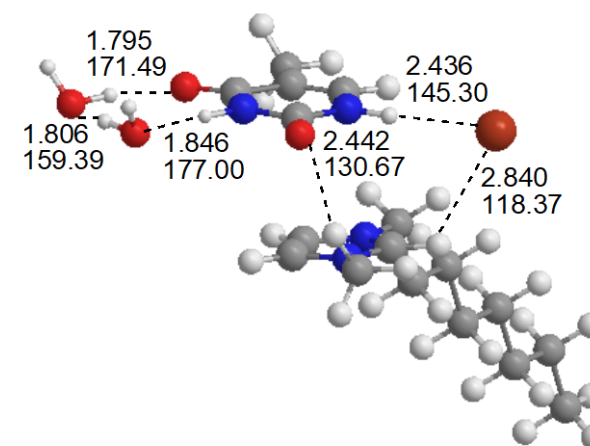T-2H<sub>2</sub>O-[C<sub>8</sub>mim]<sup>+</sup>-Br<sup>-</sup>-3 (5.77)



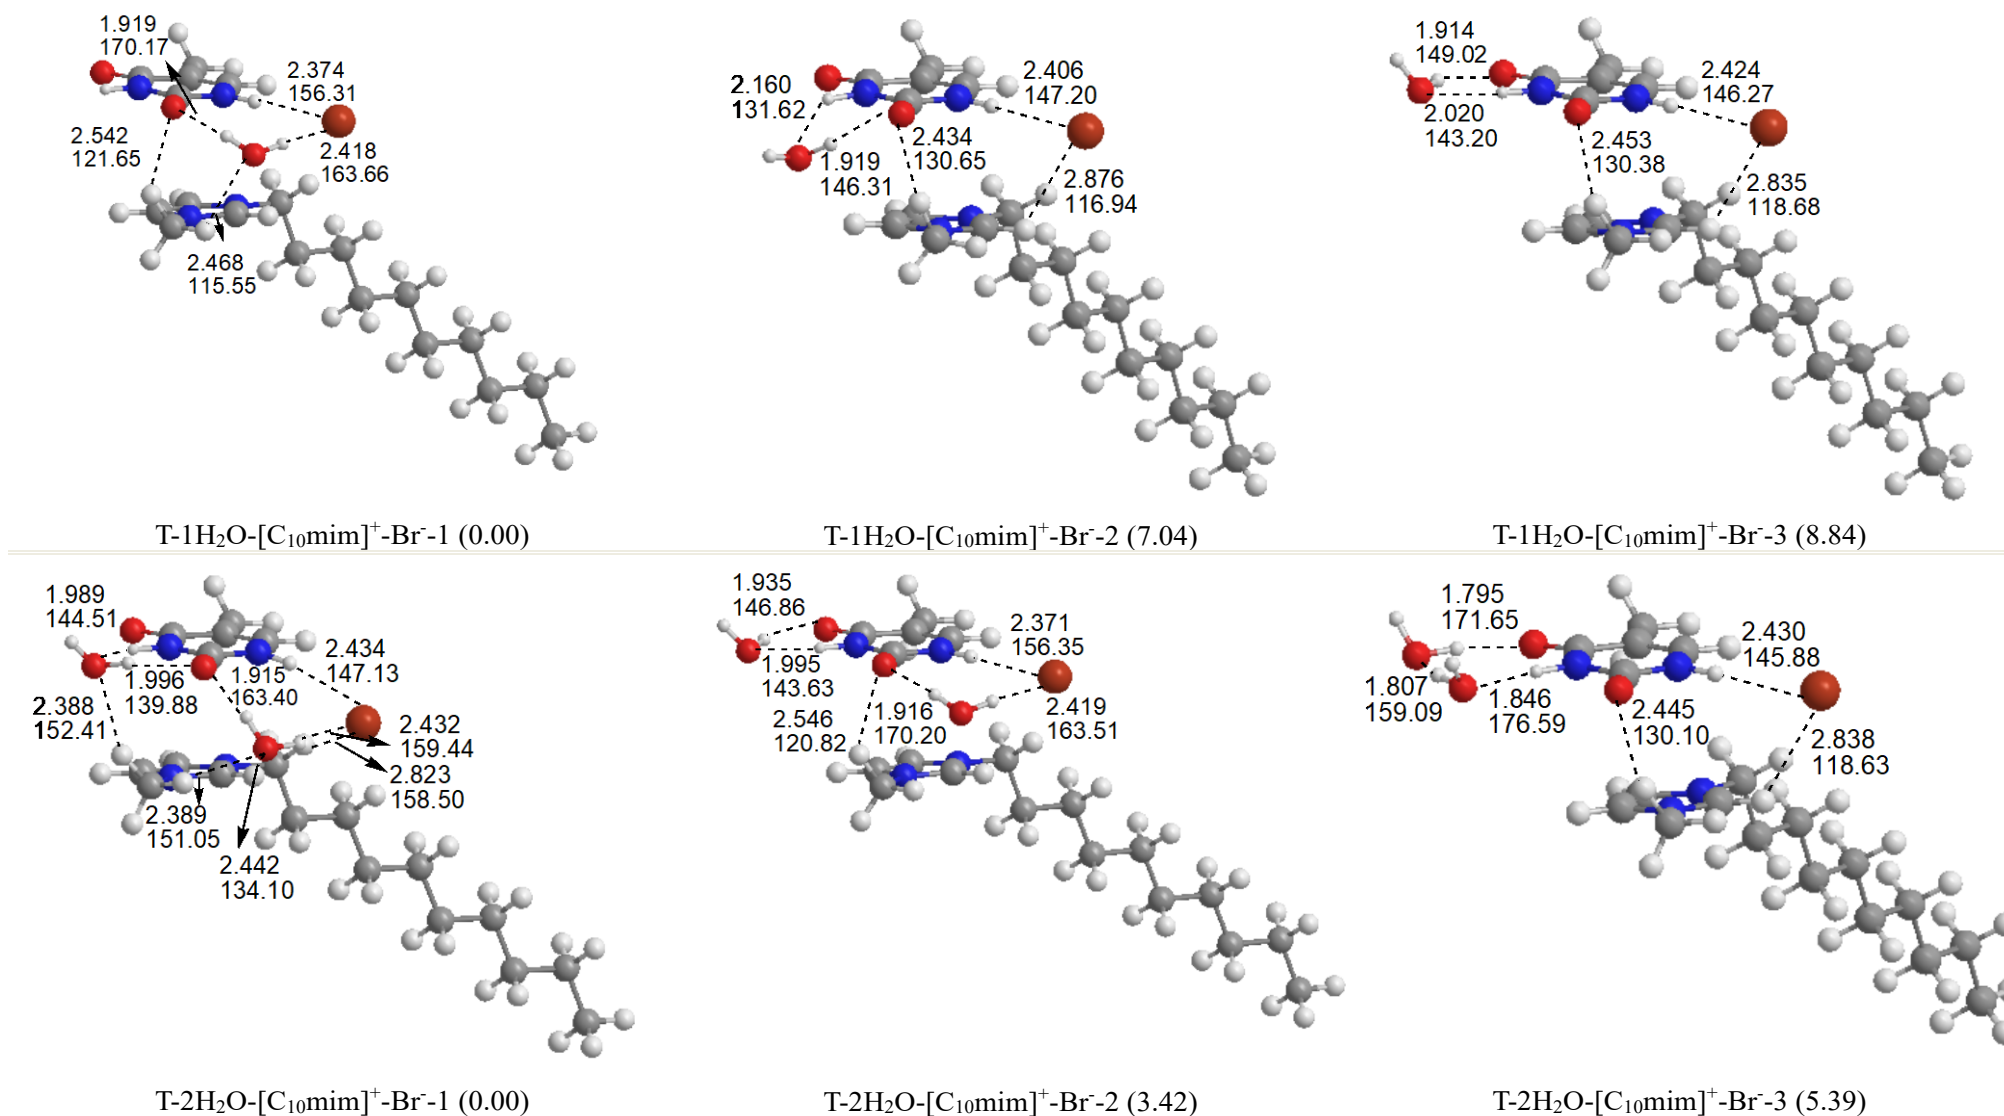

**Figure S1.** Optimized molecular structures of micro-hydrated T-*w*H<sub>2</sub>O-[C<sub>*n*</sub>mim]<sup>+</sup>-Br<sup>-</sup> (*w* = 1, 2 and *n* = 2, 4, 6, 8, 10) at the M06-2X/6-311++G(2*d*, *p*)/PCM/water level. The ZPVE-corrected stability decreases from left to right (in kJ/mol).

Occupied orbitals

T

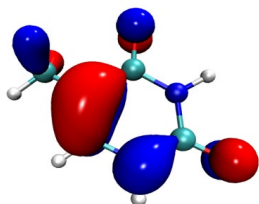

T-4H<sub>2</sub>O-Br-1

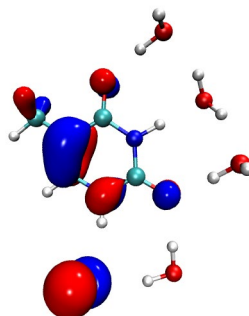

HOMO

T-3H<sub>2</sub>O-[C<sub>2</sub>mim]<sup>+</sup>-Br-1

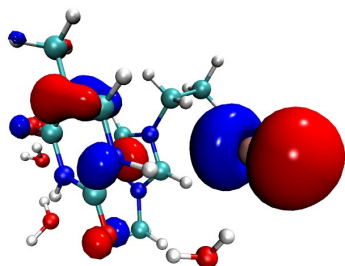

HOMO

HOMO-2

T-2H<sub>2</sub>O-[C<sub>2</sub>mim]<sup>+</sup>-2Br-1

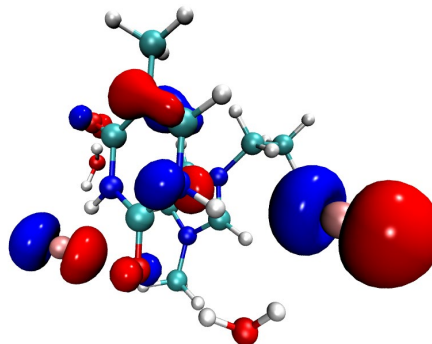

HOMO-1

T-1H<sub>2</sub>O-2[C<sub>2</sub>mim]<sup>+</sup>-2Br-1

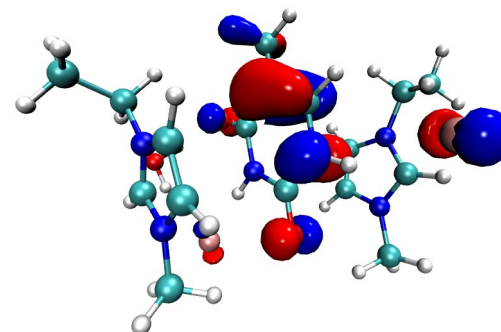

HOMO-3

---

T-3H<sub>2</sub>O-[C<sub>4</sub>mim]<sup>+</sup>-Br<sup>-</sup>-1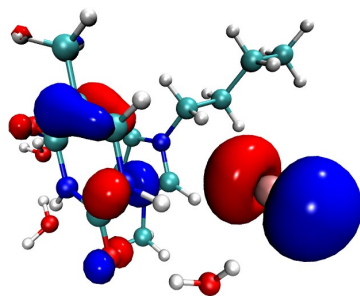

HOMO

---

T-2H<sub>2</sub>O-[C<sub>4</sub>mim]<sup>+</sup>-2Br<sup>-</sup>-1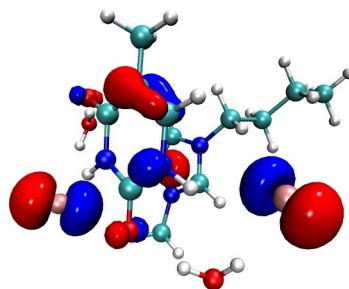

HOMO

---

T-1H<sub>2</sub>O-2[C<sub>4</sub>mim]<sup>+</sup>-2Br<sup>-</sup>-1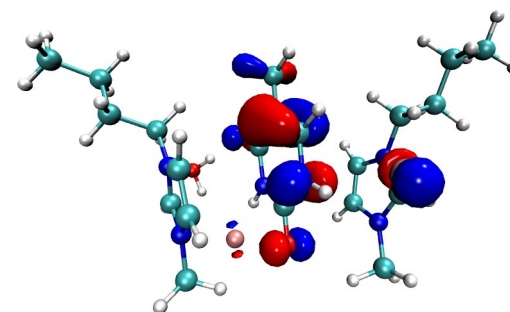

HOMO-3

---

T-3H<sub>2</sub>O-[C<sub>6</sub>mim]<sup>+</sup>-Br<sup>-</sup>-1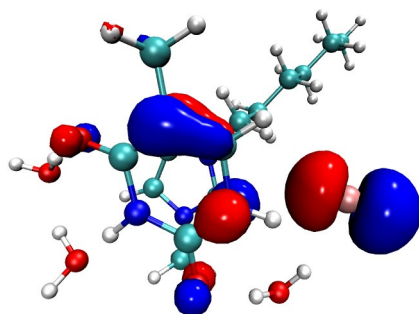

HOMO

---

T-2H<sub>2</sub>O-[C<sub>6</sub>mim]<sup>+</sup>-2Br<sup>-</sup>-1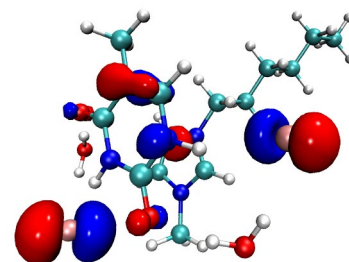

HOMO

---

T-1H<sub>2</sub>O-2[C<sub>6</sub>mim]<sup>+</sup>-2Br<sup>-</sup>-1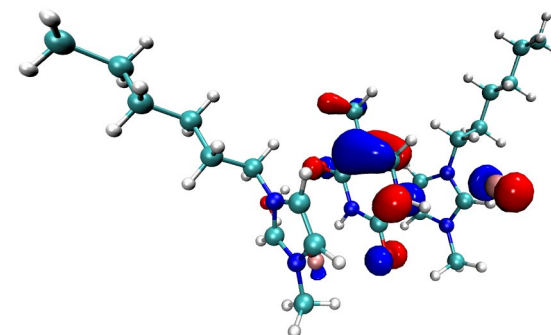

HOMO-3

*continued*

T-3H<sub>2</sub>O-[C<sub>8</sub>mim]<sup>+</sup>-Br<sup>-</sup>-1

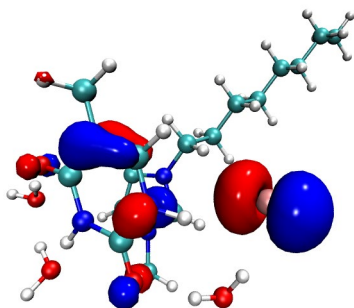

T-2H<sub>2</sub>O-[C<sub>8</sub>mim]<sup>+</sup>-2Br<sup>-</sup>-1

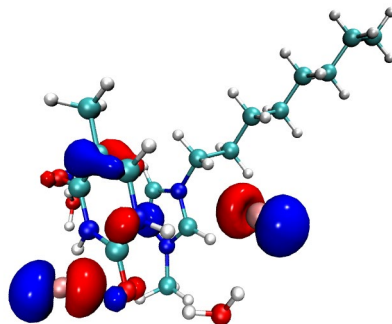

T-1H<sub>2</sub>O-2[C<sub>8</sub>mim]<sup>+</sup>-2Br<sup>-</sup>-1

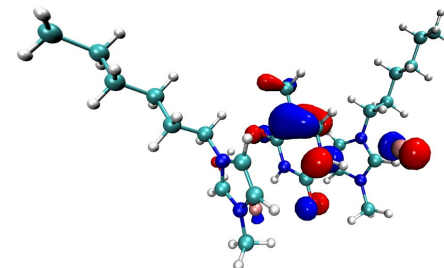

HOMO

T-3H<sub>2</sub>O-[C<sub>10</sub>mim]<sup>+</sup>-Br<sup>-</sup>-1

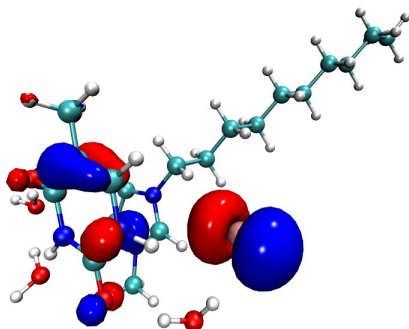

HOMO

HOMO

T-2H<sub>2</sub>O-[C<sub>10</sub>mim]<sup>+</sup>-2Br<sup>-</sup>-1

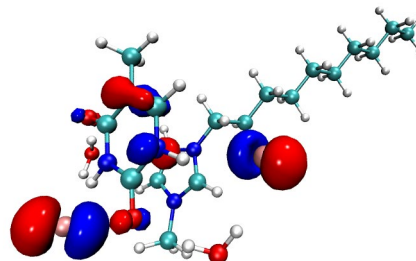

HOMO

HOMO-3

T-1H<sub>2</sub>O-2[C<sub>10</sub>mim]<sup>+</sup>-2Br<sup>-</sup>-1

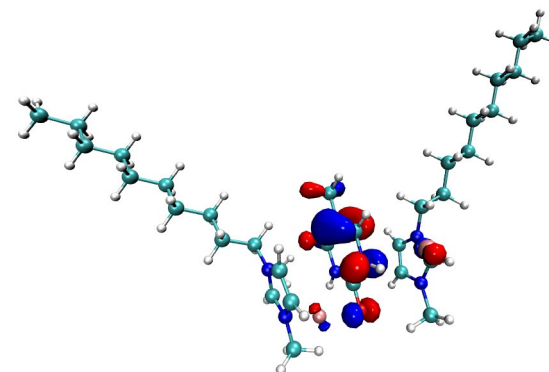

HOMO-3

Unoccupied orbitals

T

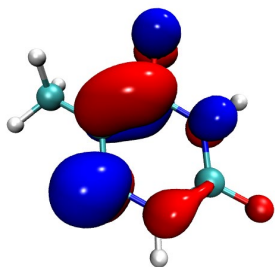

T-4H<sub>2</sub>O-Br<sup>-</sup>-1

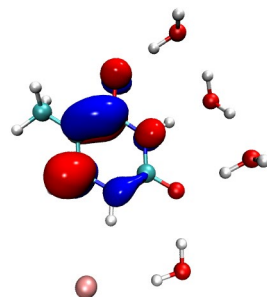

LUMO

T-3H<sub>2</sub>O-[C<sub>2</sub>mim]<sup>+</sup>-Br<sup>-</sup>-1

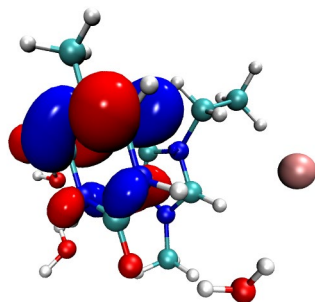

LUMO

T-2H<sub>2</sub>O-[C<sub>2</sub>mim]<sup>+</sup>-2Br<sup>-</sup>-1

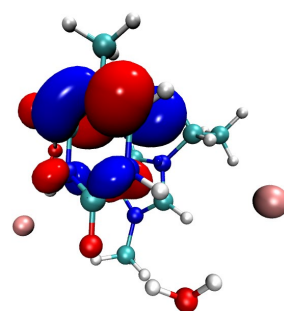

T-1H<sub>2</sub>O-2[C<sub>2</sub>mim]<sup>+</sup>-2Br<sup>-</sup>-1

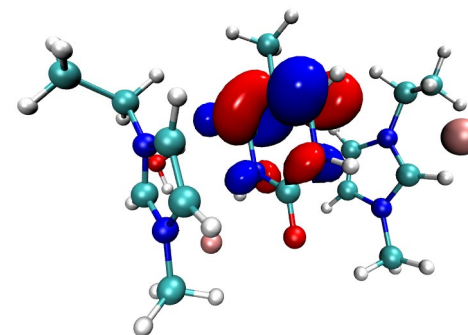

LUMO

LUMO

LUMO

*continued*

T-3H<sub>2</sub>O-[C<sub>4</sub>mim]<sup>+</sup>-Br<sup>-</sup>1

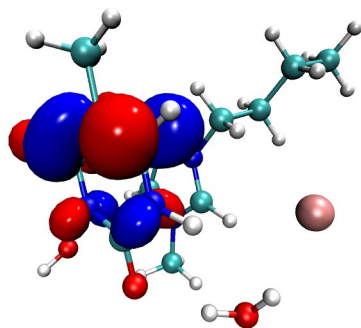

LUMO

T-2H<sub>2</sub>O-[C<sub>4</sub>mim]<sup>+</sup>-2Br<sup>-</sup>1

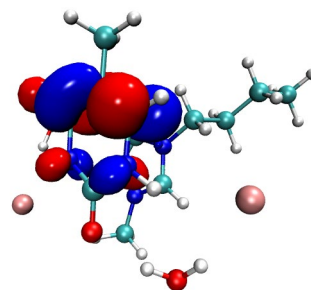

LUMO

T-1H<sub>2</sub>O-2[C<sub>4</sub>mim]<sup>+</sup>-2Br<sup>-</sup>1

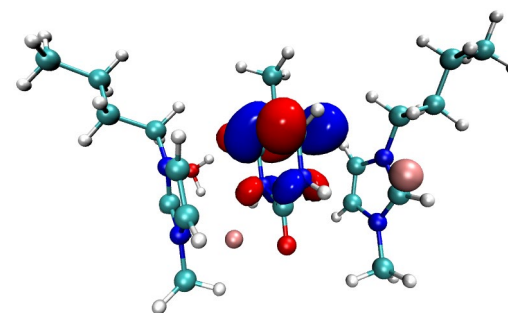

LUMO

T-3H<sub>2</sub>O-[C<sub>6</sub>mim]<sup>+</sup>-Br<sup>-</sup>1

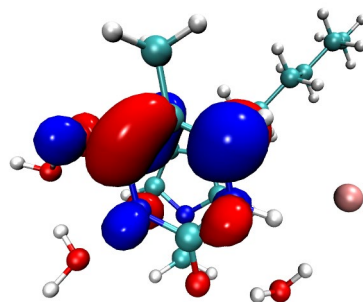

LUMO

T-2H<sub>2</sub>O-[C<sub>6</sub>mim]<sup>+</sup>-2Br<sup>-</sup>1

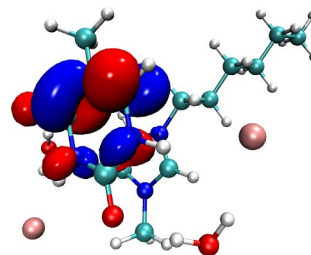

LUMO

T-1H<sub>2</sub>O-2[C<sub>6</sub>mim]<sup>+</sup>-2Br<sup>-</sup>1

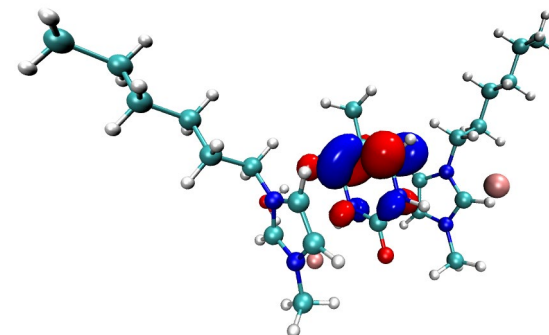

LUMO

T-3H<sub>2</sub>O-[C<sub>8</sub>mim]<sup>+</sup>-Br<sup>-</sup>1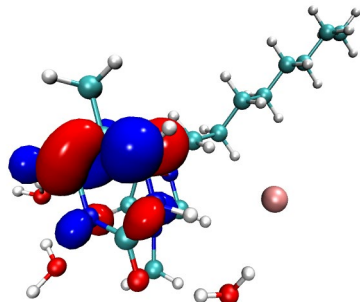T-2H<sub>2</sub>O-[C<sub>8</sub>mim]<sup>+</sup>-2Br<sup>-</sup>1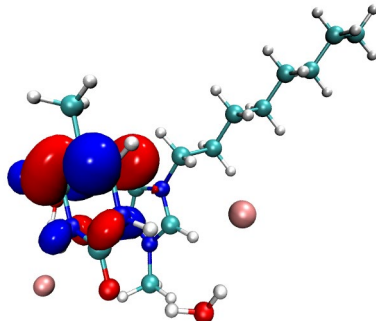T-1H<sub>2</sub>O-2[C<sub>8</sub>mim]<sup>+</sup>-2Br<sup>-</sup>1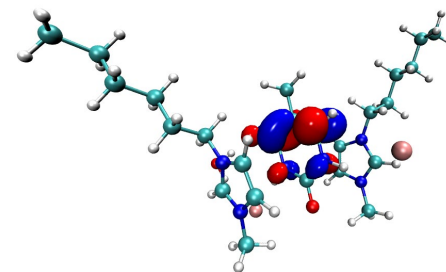

LUMO

T-3H<sub>2</sub>O-[C<sub>10</sub>mim]<sup>+</sup>-Br<sup>-</sup>1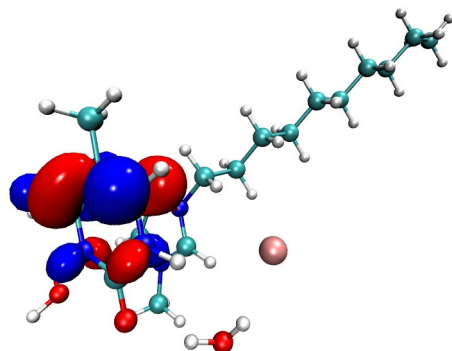

LUMO

T-2H<sub>2</sub>O-[C<sub>10</sub>mim]<sup>+</sup>-2Br<sup>-</sup>1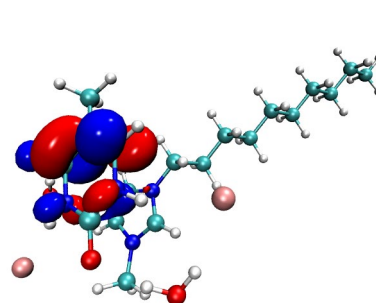

LUMO

T-1H<sub>2</sub>O-2[C<sub>10</sub>mim]<sup>+</sup>-2Br<sup>-</sup>1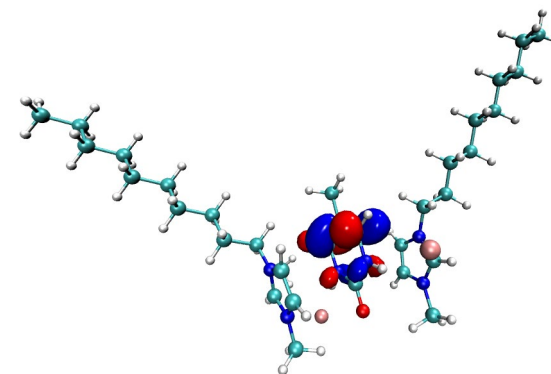

LUMO

LUMO

LUMO

**Figure S2.** The isosurface maps of the frontier molecular orbitals for the isolated T, micro-hydrated T-4H<sub>2</sub>O-Br<sup>-</sup>1, T-3H<sub>2</sub>O-[C<sub>n</sub>mim]<sup>+</sup>-Br<sup>-</sup>1, T-2H<sub>2</sub>O-[C<sub>n</sub>mim]<sup>+</sup>-2Br<sup>-</sup>1, and T-1H<sub>2</sub>O-2[C<sub>n</sub>mim]<sup>+</sup>-2Br<sup>-</sup>1 species calculated at the TD-M06-2X/6-311++G(2d, p)/PCM/water level (isovalues = 0.0 1 a.u.).
